# Supplementary material
Source: MDPI journal article supplement (https://www.mdpi.com/1999-4893/14/7/217)
Supplement: s1 [file s1]

## Supplementary Materials

|                                                                                              |        |
|----------------------------------------------------------------------------------------------|--------|
| S1. Cultural Heritage Conservation Center of Central Java .....                              | 1      |
| S1.1 Criteria assessment by Cultural Heritage Conservation Center of Central Java.....       | 1      |
| S1.2 Scenario assessment based on (C1) Integration Transport System .....                    | 2      |
| S1.3 Scenario assessment based on (C5) Comprehensif Planning .....                           | 2      |
| S1.4 Scenario assessment based on (C6) Protection of cultural assets .....                   | 3      |
| S1.5 Scenario assessment based on (C7) Low-impact transportation.....                        | 3      |
| S1.6 Scenario assessment based on (C8) Visitor management.....                               | 3      |
| S1.7 Scenario assessment by Cultural Heritage Conservation Center of Central Java.....       | 3      |
| <br>S2. Natural Resources Conservation Center of Central Java .....                          | <br>4  |
| S2.1 Criteria Assessment by Natural Resources Conservation Center of Central Java.....       | 4      |
| S2.2 Scenario assessment based on (C1) integration transport system.....                     | 4      |
| S2.3 Scenario assessment based on (C7) low impact transportation system.....                 | 4      |
| S2.4 Scenario assessment based on (C6) protection cultural assets.....                       | 5      |
| S2.5 Scenario assessment based on (C5) comprehensif Planning.....                            | 5      |
| S2.6 Scenario assessment based on (C8) visitor management.....                               | 6      |
| S2.7 Scenario Assessment by Natural Resources Conservation Center of Central Java.....       | 6      |
| <br>S3. Regional Development Planning Agency of Central Java Province .....                  | <br>7  |
| S3.1 Criteria Assessment by Regional Development Planning Agency of Central Java Province... | 7      |
| S3.2 Scenario assessment based on (C1) integrated transport system.....                      | 7      |
| S3.3 Scenario assessment based on (C4) various transport system.....                         | 7      |
| S3.4 Scenario assessment based on (C3) Accesibility .....                                    | 8      |
| S3.5 Scenario assessment based on (C5) comprehensif planning.....                            | 8      |
| S3.6 Scenario assessment based on (C8) visitor management.....                               | 9      |
| S3.7 Scenario assessment based on (C12) transport equality.....                              | 9      |
| S3.8 Scenario Assessment by Regional Development Planning Agency of Central Java Province..  | 9      |
| <br>S4. Provincial Transportation Agency Central Java .....                                  | <br>10 |
| S4.1 Criteria Assessment by Provincial Transportation Agency of Central Java.....            | 10     |
| S4.2 Scenario assessment based on (C1) integrated transport system.....                      | 10     |
| S4.3 Scenario assessment based on (C2) Safety and security.....                              | 10     |
| S4.4 Scenario assessment based on (C3) Accesibility.....                                     | 11     |
| S4.5 Scenario assessment based on (C5) comprehensif planning.....                            | 11     |
| S4.6 Scenario assessment based on (C4) various transport system.....                         | 12     |
| S4.7 Scenario Assessment by Central Java Provincial Transportation Office.....               | 12     |
| <br>S5. The Central Java Provincial Tourism Office (Dispar Jateng) .....                     | <br>13 |
| S5.1 Criteria Assessment by The Central Java Provincial Tourism Office.....                  | 13     |
| S5.2 Scenario assessment based on (C4) various transport system.....                         | 13     |
| S5.3 Scenario assessment based on (C1) integrated transport system.....                      | 13     |
| S5.4 Scenario assessment based on (C5) comprehensif planning.....                            | 14     |
| S5.5 Scenario assessment based on (C8) visitor management.....                               | 14     |
| S5.6 Scenario assessment based on (C13) suporting cultural event.....                        | 15     |
| S5.7 Scenario Assessment by The Central Java Provincial Tourism Office .....                 | 15     |

|                                                                                             |    |
|---------------------------------------------------------------------------------------------|----|
| S6. The Central Java Land Transport Organization .....                                      | 16 |
| S6.1 Criteria Assessment by The Central Java Land Transport Organization .....              | 16 |
| S6.2 Scenario assessment based on (C4) Various transport System .....                       | 16 |
| S6.3 Scenario assessment based on (C1) Integration Transport System .....                   | 16 |
| S6.4 Scenario assessment based on (C5) Comprehensif Planning .....                          | 17 |
| S6.5 Scenario assessment based on (C2) Safety and security .....                            | 17 |
| S6.6 Scenario assessment by The Central Java Land Transport Organization .....              | 18 |
| <br>S7. Regional Planning and Development Agency of Wonosobo Regency.....                   | 19 |
| S7. 1 Criteria assessment by Regional Planning and Development Agency of Wonosobo .....     | 19 |
| S7. 2 Scenario assessment based on (C1) Integration Transport System .....                  | 19 |
| S7. 3 Scenario assessment based on (C4) Various transport System .....                      | 19 |
| S7. 4 Scenario assessment based on (C3) Accesibility .....                                  | 20 |
| S7. 5 Scenario assessment based on (C5) Comprehensif Planning .....                         | 20 |
| S7. 6 Scenario assessment by Regional Planning and Development Agency of Wonosobo .....     | 21 |
| <br>S8. Transportation Office of Wonosobo Regency .....                                     | 22 |
| S8.1 Criteria assessment byTransportation Office of Wonosobo Regency .....                  | 22 |
| S8.2 Scenario assessment based on (C1) Integration Transport System .....                   | 22 |
| S8.3 Scenario assessment based on (C2) Safety and security .....                            | 22 |
| S8.4 Scenario assessment based on (C3) Accesibility .....                                   | 23 |
| S8.5 Scenario assessment based on (C5) Comprehensif Planning .....                          | 23 |
| S8.6 Scenario assessment based on (C8) Visitor management .....                             | 24 |
| S8.7 Scenario assessment byTransportation Office of Wonosobo Regency .....                  | 24 |
| <br>S9. Tourism and Culture Office of Wonosobo Regency .....                                | 25 |
| S9.1 Criteria assessment by Tourism and Culture Office of Wonosobo Regency .....            | 25 |
| S9.2 Scenario assessment based on (C4) Various transport System .....                       | 25 |
| S9.3 Scenario assessment based on (C1) Integration Transport System .....                   | 25 |
| S9.4 Scenario assessment based on (C5) Comprehensif Planning .....                          | 26 |
| S9.5 Scenario assessment based on (C8) Visitor management .....                             | 26 |
| S9.6 Scenario assessment based on (C10) Visitors experience .....                           | 27 |
| S9.7 Scenario assessment based on (C13) Suporting Cultural Event .....                      | 27 |
| S9.8 Scenario assessment by Tourism and Culture Office of Wonosobo Regency .....            | 27 |
| <br>S10. Wonosobo Land Transportation Organization .....                                    | 28 |
| S10.1 Criteria assessment byThe Wonosobo Land Transportation Organization .....             | 28 |
| S10. 2 Scenario assessment based on (C4) Various transport System .....                     | 28 |
| S10. 3 Scenario assessment based on (C1) Integration Transport System .....                 | 28 |
| S10. 4 Scenario assessment based on (C5) Comprehensif Planning .....                        | 29 |
| S10. 5 Scenario assessment based on (C8) Visitor management .....                           | 29 |
| S10. 6 Scenario assessment based on (C11) Efisiensi Operasional .....                       | 30 |
| S10. 7 Scenario assessment byThe Wonosobo Land Transportation Organization .....            | 30 |
| <br>S11. Research and Development Planning Agency of Banjarnegara Regency .....             | 31 |
| S11.1 Criteria assessment by Research and Development Planning Agency of Banjarnegara ..... | 31 |
| S11. 2 Scenario assessment based on (C1) Integration Transport System .....                 | 31 |
| S11.3 Scenario assessment based on (C2) Safety and security .....                           | 31 |
| S11.4 Scenario assessment based on (C3) Accesibility .....                                  | 32 |
| S11.5 Scenario assessment based on (C5) Comprehensif Planning .....                         | 32 |
| S11.6 Scenario assessment based on (C8) Visitor management .....                            | 33 |

|                                                                                             |    |
|---------------------------------------------------------------------------------------------|----|
| S11.7 Scenario assessment by Research and Development Planning Agency of Banjarnegara ..... | 33 |
| S12. Transportation Office of Banjarnegara Regency .....                                    | 34 |
| S12.1 Criteria assessment by Transportation Office of Banjarnegara Regency .....            | 34 |
| S12.2 Scenario assessment based on (C1) Integration Transport System .....                  | 34 |
| S12.3 Scenario assessment based on (C2) Safety and security .....                           | 34 |
| S12.4 Scenario assessment based on (C3) Accesibility .....                                  | 35 |
| S12.5 Scenario assessment based on (C5) Comprehensif Planning .....                         | 35 |
| S12.6 Scenario assessment based on (C8) Visitor management .....                            | 36 |
| S12.7 Scenario assessment by Transportation Office of Banjarnegara Regency .....            | 36 |
| S13. Tourism and Culture Office of Banjarnegara Regency .....                               | 37 |
| S13.1 Criteria assessment Tourism and Culture Office of Banjarnegara Regency .....          | 37 |
| S13.2 Scenario assessment based on (C4) Various transport System .....                      | 37 |
| S13.3 Scenario assessment based on (C1) Integration Transport System .....                  | 37 |
| S13.4 Scenario assessment based on (C5) Comprehensif Planning .....                         | 38 |
| S13.5 Scenario assessment based on (C8) Visitor management .....                            | 38 |
| S13.6 Scenario assessment based on (C13) Suporting Cultural Event .....                     | 39 |
| S13.7 Scenario assessment Tourism and Culture Office of Banjarnegara Regency .....          | 39 |
| S14. Land Transportation Organization Banjarnegara .....                                    | 40 |
| S14.1 Criteria assessment Land Transportation Organization Banjarnegara .....               | 40 |
| S14.2 Scenario assessment based on (C4) Various transport System .....                      | 40 |
| S14.3 Scenario assessment based on (C1) Integration Transport System .....                  | 40 |
| S14.4 Scenario assessment based on (C5) Comprehensif Planning .....                         | 41 |
| S14.5 Scenario assessment based on (C2) Safety and security .....                           | 41 |
| S14.6 Scenario assessment based on (C11) Efisienci Operasional .....                        | 42 |
| S14.7 Scenario assessment Land Transportation Organization Banjarnegara .....               | 42 |
| S15. Pokdarwis Dieng Pandhawa (Tourism Awareness Group ).....                               | 43 |
| S15.1 Criteria assessment Pokdarwis Dieng Pandhawa .....                                    | 43 |
| S15.2 Scenario assessment based on (C1) Integration Transport System .....                  | 43 |
| S15.3 Scenario assessment based on (C2) Safety and security .....                           | 43 |
| S15.4 Scenario assessment based on (C3) Accesibility .....                                  | 44 |
| S15.5 Scenario assessment based on (C5) Comprehensif Planning .....                         | 44 |
| S15.6 Scenario assessment based on (C9) Supporting local entrepreneurs .....                | 45 |
| S15.7 Scenario assessment based on (C13) Suporting Cultural Event .....                     | 45 |
| S15.8 Scenario assessment by Pokdarwis Dieng Pandhawa .....                                 | 45 |
| S16. Pokdarwis Dieng Kulon (Tourism Awareness Group ) .....                                 | 46 |
| S16.1 Criteria assessment Pokdarwis Dieng Kulon .....                                       | 46 |
| S16.2 Scenario assessment based on (C1) Integration Transport System .....                  | 46 |
| S16.3 Scenario assessment based on (C2) Safety and security .....                           | 46 |
| S16.4 Scenario assessment based on (C3) Accesibility .....                                  | 47 |
| S16.5 Scenario assessment based on (C5) Comprehensif Planning .....                         | 47 |
| S16.6 Scenario assessment based on (C9) Supporting local entrepreneurs .....                | 48 |
| S16.7 Scenario assessment based on (C13) Suporting Cultural Event .....                     | 48 |
| S16.8 Scenario assessment Pokdarwis Dieng Kulon (Tourism Awareness Group ) .....            | 48 |

|                                                                                |        |
|--------------------------------------------------------------------------------|--------|
| S17. Homestay association .....                                                | 49     |
| S17.1 Criteria assessment by the homestay association .....                    | 49     |
| S17.2 Scenario assessment based on (C4) Various transport System .....         | 49     |
| S17.3 Scenario assessment based on (C1) Integration Transport System .....     | 49     |
| S17.4 Scenario assessment based on (C3) Accesibility.....                      | 50     |
| S17.5 Scenario assessment based on (C9) Supporting local entrepreneurs .....   | 50     |
| S17.6 Scenario assessment by homestay association .....                        | 51     |
| <br>S18. ASITA (Association of The Indonesian Tours and Travel Agencies) ..... | <br>52 |
| S18.1 Criteria assessment by ASITA .....                                       | 52     |
| S18.2 Scenario assessment based on (C1) Integration Transport System .....     | 52     |
| S18.3 Scenario assessment based on (C4) Various transport System .....         | 52     |
| S18.4 Scenario assessment based on (C3) Accesibility .....                     | 53     |
| S18.5 Scenario assessment based on (C5) Comprehensif Planning .....            | 53     |
| S18.6 Scenario assessment based on (C2) Safety and security .....              | 54     |
| S18.7 Scenario assessment based on (C10) Visitors experience .....             | 54     |
| S18.8 Scenario assessment by ASITA .....                                       | 54     |
| <br>S19. IPI .....                                                             | <br>55 |
| S19.1 Criteria assessment by IPI .....                                         | 55     |
| S19.2 Scenario assessment based on (C1) Integration Transport System .....     | 55     |
| S19.3 Scenario assessment based on (C2) Safety and security .....              | 55     |
| S19.4 Scenario assessment based on (C3) Accesibility .....                     | 56     |
| S19.5 Scenario assessment based on (C5) Comprehensif Planning .....            | 56     |
| S19.6 Scenario assessment based on (C8) Visitor management .....               | 57     |
| S19.7 Scenario assessment by IPI .....                                         | 57     |
| <br>S20. ASPPI .....                                                           | <br>58 |
| S20.1 Criteria assessment by ASPPI .....                                       | 58     |
| S20.2 Scenario assessment based on (C4) Various transport System .....         | 58     |
| S20.3 Scenario assessment based on (C1) Integration Transport System .....     | 58     |
| S20.4 Scenario assessment based on (C5) Comprehensif Planning .....            | 59     |
| S20.5 Scenario assessment based on (C8) Visitor management .....               | 59     |
| S20.6 Scenario assessment by ASPPI .....                                       | 60     |
| <br>S21. Stakeholder Weight .....                                              | <br>61 |
| S21.1 Cultural Heritage Conservation Center of Central Java .....              | 61     |
| S21.2 Natural Resources Conservation Center of Central Java .....              | 62     |
| S21.3 Regional Development Planning Agency of Central Java Province .....      | 63     |
| S21.4 Provincial Transportation Agency Central Java .....                      | 64     |
| S21.5 The Central Java Provincial Tourism Office .....                         | 65     |
| S21.6 The Central Java Land Transport Organization .....                       | 66     |
| S21.7 Regional Planning and Development Agency of Wonosobo Regency .....       | 67     |
| S21.8 Transportation Office of Wonosobo Regency .....                          | 68     |
| S21.9 Tourism and Culture Office of Wonosobo Regency .....                     | 69     |
| S21.10 The Wonosobo Land Transportation Organization .....                     | 70     |
| S21.11 Research and Development Planning Agency of Banjarnegara Regency .....  | 71     |
| S21.12 Transportation Office of Banjarnegara Regency .....                     | 72     |
| S21.13 Tourism and Culture Office of Banjarnegara Regency .....                | 73     |
| S21.14 Land Transportation Organization Banjarnegara .....                     | 74     |
| S21.15 Pokdarwis Dieng Pandhawa .....                                          | 75     |

|                                                                                                |    |
|------------------------------------------------------------------------------------------------|----|
| S21.16 Pokdarwis Dieng Kulon .....                                                             | 76 |
| S21.17 The homestay association .....                                                          | 77 |
| S21.18 ASITA .....                                                                             | 78 |
| S21.19 IPI .....                                                                               | 79 |
| S21.20 ASPPI .....                                                                             | 80 |
| S21.21 Total Stakeholder Weight .....                                                          | 81 |
| S.22 Multiplication of the Mamca(A) policy scenario matrix and stakeholder weight matrix ..... | 82 |

## Multi-actor multi-criteria analisis with stakeholder weight

|                                  |                                   |                                    |                               |
|----------------------------------|-----------------------------------|------------------------------------|-------------------------------|
| C1. Integration Transport Svstem | C5. Comprehensif Planning         | C9. Supporting local entrepreneurs | C13. Suporting Cultural Event |
| C2. Safety and security          | C6. Protection of cultural assets | C10. Visitors experience           |                               |
| C3. Accesibility                 | C7. Low-impact transportation     | C11. Efisiensi Operasional         |                               |
| C4. Various transport System     | C8. Visitor management            | C12. Transport equality            |                               |

|                                                                                      |                                                                               |                                                                      |
|--------------------------------------------------------------------------------------|-------------------------------------------------------------------------------|----------------------------------------------------------------------|
| S1. Cultural Heritage Conservation Center of Central Java (BPCB Jateng)              | S8. Transportation Office of Wonosobo Regency (Dishub Wonosobo)               | S15. Pokdarwis Dieng Pandhawa (Tourism Awareness Group )             |
| S2. Natural Resources Conservation Center of Central Java (BKSDA Jateng)             | S9. Tourism and Culture Office of Wonosobo Regency (Dispar Wonosobo)          | S16. Pokdarwis Dieng Kulon (Tourism Awareness Group )                |
| S3. Regional Development Planning Agency of Central Java Province (Bappeda Jateng)   | S10. The Wonosobo Land Transportation Organization (Organda Wonosobo)         | S17. The homestay association (paguyuban Homestay)                   |
| S4. Central Java Provincial Transportation Office (Dishub Jateng)                    | S11. Research and Development Planning Agency of Banjarnegara Regency         | S18. ASITA (Association of The Indonesian Tours and Travel Agencies) |
| S5. The Central Java Provincial Tourism Office (Dispar Jateng)                       | S12. Transportation Office of Banjarnegara Regency (Dishub Banjarnegara)      | S19. IPI (Insan Pariwisata Indonesia)                                |
| S6. The Central Java Land Transport Organization (ORGANDA Jateng)                    | S13. Tourism and Culture Office of Banjarnegara Regency (Dispar Banjarnegara) | S20. ASPPI (Assosiasi Pelaku Pariwisata Indonesia)                   |
| S7. Regional Planning and Development Agency of Wonosobo Regency (Bappeda Wonosobo), | S14. Land Transportation Organization Banjarnegara (Organda Banjarnegara)     |                                                                      |

### S1. Cultural Heritage Conservation Center of Central Java (BPCB Jateng)

#### S1.1 Criteria assessment by Cultural Heritage Conservation Center of Central Java (BPCB Jateng)

| Criteria | C1    | C5   | C6    | C7   | C8   |
|----------|-------|------|-------|------|------|
| C1       | 1.00  | 0.14 | 0.50  | 0.11 | 0.20 |
| C5       | 7.00  | 1.00 | 5.00  | 0.50 | 2.00 |
| C6       | 2.00  | 0.20 | 1.00  | 0.17 | 0.50 |
| C7       | 9.00  | 2.00 | 6.00  | 1.00 | 4.00 |
| C8       | 5.00  | 0.50 | 2.00  | 0.25 | 1.00 |
|          | 24.00 | 3.84 | 14.50 | 2.03 | 7.70 |

| Criteria | C1   | C5   | C6   | C7   | C8   | Everage (a) |
|----------|------|------|------|------|------|-------------|
| C1       | 0.04 | 0.04 | 0.03 | 0.05 | 0.03 | 0.04        |
| C5       | 0.29 | 0.26 | 0.34 | 0.25 | 0.26 | 0.28        |
| C6       | 0.08 | 0.05 | 0.07 | 0.08 | 0.06 | 0.07        |
| C7       | 0.38 | 0.52 | 0.41 | 0.49 | 0.52 | 0.46        |
| C8       | 0.21 | 0.13 | 0.14 | 0.12 | 0.13 | 0.15        |
|          | 1.00 | 1.00 | 1.00 | 1.00 | 1.00 | 1.00        |

| mmult (b) | (a x b) | Lamda | CI    | RI    | CR    |
|-----------|---------|-------|-------|-------|-------|
| 0.195     | 5.019   | 5.065 | 0.016 | 1.188 | 0.014 |
| 1.428     | 5.088   |       |       |       |       |
| 0.354     | 5.042   |       |       |       |       |
| 2.380     | 5.126   |       |       |       |       |
| 0.737     | 5.051   |       |       |       |       |

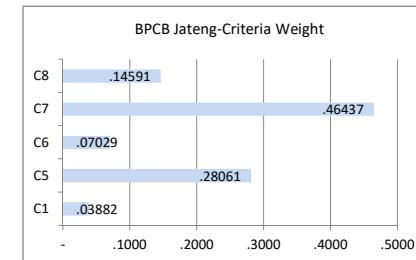

#### S1.2 Scenario assessment based on (C1) Integration Transport System

| Criteria | Sce 1 | Sce 2 | Sce 3 | Sce 4 |
|----------|-------|-------|-------|-------|
| Sce 1    | 1.00  | 0.33  | 0.20  | 0.14  |
| Sce 2    | 3.00  | 1.00  | 0.33  | 0.33  |
| Sce 3    | 5.00  | 3.00  | 1.00  | 0.50  |
| Sce 4    | 7.00  | 3.00  | 2.00  | 1.00  |
|          | 16.00 | 7.33  | 3.53  | 1.98  |

| Criteria | Sce 1 | Sce 2 | Sce 3 | Sce 4 | Everage (a) |
|----------|-------|-------|-------|-------|-------------|
| Sce 1    | 0.06  | 0.05  | 0.06  | 0.07  | 0.06        |
| Sce 2    | 0.19  | 0.14  | 0.09  | 0.17  | 0.15        |
| Sce 3    | 0.31  | 0.41  | 0.28  | 0.25  | 0.31        |
| Sce 4    | 0.44  | 0.41  | 0.57  | 0.51  | 0.48        |
|          | 1.00  | 1.00  | 1.00  | 1.00  |             |

| mmult (b) | (a x b) | Lamda | CI    | RI    | CR    |
|-----------|---------|-------|-------|-------|-------|
| 0.240     | 4.045   | 4.064 | 0.021 | 0.990 | 0.022 |
| 0.589     | 4.015   |       |       |       |       |
| 1.290     | 4.104   |       |       |       |       |
| 1.963     | 4.093   |       |       |       |       |

S1.3 Scenario assessment based on (C5) Comprehensive Planning



S1.4 Scenario assessment based on (C6) Protection of cultural assets

|       | Sce 1 | Sce 2 | Sce 3 | Sce 4 |  | Sce 1 | Sce 2 | Sce 3 | Sce 4 | Everage<br>(a) | mmult<br>(b) | (a x b) | Lamda | CI    | RI    | CR    |       |
|-------|-------|-------|-------|-------|--|-------|-------|-------|-------|----------------|--------------|---------|-------|-------|-------|-------|-------|
| Sce 1 | 1.00  | 0.33  | 0.20  | 0.17  |  | Sce 1 | 0.07  | 0.04  | 0.06  | 0.09           | 0.0626       | 0.252   | 4.025 | 4.080 | 0.027 | 0.990 | 0.027 |
| Sce 2 | 3.00  | 1.00  | 0.33  | 0.25  |  | Sce 2 | 0.20  | 0.12  | 0.09  | 0.13           | 0.1362       | 0.550   | 4.038 |       |       |       |       |
| Sce 3 | 5.00  | 3.00  | 1.00  | 0.50  |  | Sce 3 | 0.33  | 0.36  | 0.28  | 0.26           | 0.3093       | 1.277   | 4.127 |       |       |       |       |
| Sce 4 | 6.00  | 4.00  | 2.00  | 1.00  |  | Sce 4 | 0.40  | 0.48  | 0.57  | 0.52           | 0.4919       | 2.031   | 4.128 |       |       |       |       |
|       | 15.00 | 8.33  | 3.53  | 1.92  |  |       | 1.00  | 1.00  | 1.00  | 1.00           |              |         |       |       |       |       |       |

S1.5 Scenario assessment based on (C7) Low-impact transportation

|       | Sce 1 | Sce 2 | Sce 3 | Sce 4 |
|-------|-------|-------|-------|-------|
| Sce 1 | 1.00  | 0.33  | 0.20  | 0.14  |
| Sce 2 | 3.00  | 1.00  | 0.33  | 0.20  |
| Sce 3 | 5.00  | 3.00  | 1.00  | 0.50  |
| Sce 4 | 7.00  | 5.00  | 2.00  | 1.00  |
|       | 16.00 | 9.33  | 3.53  | 1.84  |

|       | Sce 1 | Sce 2 | Sce 3 | Sce 4 | Everage (a) |
|-------|-------|-------|-------|-------|-------------|
| Sce 1 | 0.06  | 0.04  | 0.06  | 0.08  | 0.0581      |
| Sce 2 | 0.19  | 0.11  | 0.09  | 0.11  | 0.1244      |
| Sce 3 | 0.31  | 0.32  | 0.28  | 0.27  | 0.2971      |
| Sce 4 | 0.44  | 0.54  | 0.57  | 0.54  | 0.5205      |
|       | 1.00  | 1.00  | 1.00  | 1.00  |             |

| mmult (b) | (a x b) | Lamda | CI    | RI    | CR    |
|-----------|---------|-------|-------|-------|-------|
| 0.233     | 4.017   | 4.070 | 0.023 | 0.990 | 0.023 |
| 0.502     | 4.034   |       |       |       |       |
| 1.221     | 4.110   |       |       |       |       |
| 2.143     | 4.118   |       |       |       |       |

S1.6 Scenario assessment based on (C8) Visitor management

|       | Sce 1 | Sce 2 | Sce 3 | Sce 4 |
|-------|-------|-------|-------|-------|
| Sce 1 | 1.00  | 0.33  | 0.20  | 0.14  |
| Sce 2 | 3.00  | 1.00  | 0.33  | 0.20  |
| Sce 3 | 5.00  | 3.00  | 1.00  | 0.33  |
| Sce 4 | 7.00  | 5.00  | 3.00  | 1.00  |
|       | 16.00 | 9.33  | 4.53  | 1.68  |

|       | Sce 1 | Sce 2 | Sce 3 | Sce 4 | Everage (a) |
|-------|-------|-------|-------|-------|-------------|
| Sce 1 | 0.06  | 0.04  | 0.04  | 0.09  | 0.0569      |
| Sce 2 | 0.19  | 0.11  | 0.07  | 0.12  | 0.1219      |
| Sce 3 | 0.31  | 0.32  | 0.22  | 0.20  | 0.2633      |
| Sce 4 | 0.44  | 0.54  | 0.66  | 0.60  | 0.5579      |
|       | 1.00  | 1.00  | 1.00  | 1.00  |             |

| mmult (b) | (a x b) | Lamda | CI    | RI    | CR    |
|-----------|---------|-------|-------|-------|-------|
| 0.230     | 4.041   | 4.118 | 0.039 | 0.990 | 0.040 |
| 0.492     | 4.036   |       |       |       |       |
| 1.099     | 4.175   |       |       |       |       |
| 2.356     | 4.222   |       |       |       |       |

S1.7 Scenario assessment by Cultural Heritage Conservation Center of Central Java

|       | C1     | C5     | C6     | C7     | C8     | Criteria | Scenario Priority |
|-------|--------|--------|--------|--------|--------|----------|-------------------|
| Sce 1 | 0.0592 | 0.0569 | 0.0626 | 0.0581 | 0.0569 | 0.039    | 5.79%             |
| Sce 2 | 0.1467 | 0.1219 | 0.1362 | 0.1244 | 0.1219 | 0.2806   | 12.50%            |
| Sce 3 | 0.3144 | 0.2633 | 0.3093 | 0.2971 | 0.2633 | 0.0703   | 28.42%            |
| Sce 4 | 0.4797 | 0.5579 | 0.4919 | 0.5205 | 0.5579 | 0.4644   | 53.28%            |
|       | 1.0000 | 1.0000 | 1.0000 | 1.0000 | 1.0000 | 0.1459   |                   |

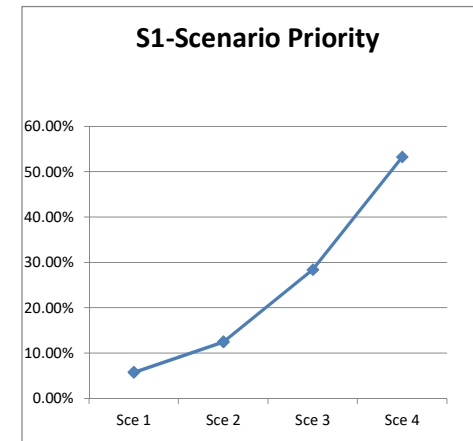



## S2. Natural Resources Conservation Center of Central Java (BKSDA Jateng)

### S2.1 Criteria Assessment by Natural Resources Conservation Center of Central Java

| Criteria | C1    | C7   | C6   | C5   | C8    |
|----------|-------|------|------|------|-------|
| C1       | 1.00  | 0.17 | 0.25 | 0.13 | 0.33  |
| C7       | 6.00  | 1.00 | 3.00 | 0.33 | 4.00  |
| C6       | 4.00  | 0.33 | 1.00 | 0.25 | 2.00  |
| C5       | 8.00  | 3.00 | 4.00 | 1.00 | 6.00  |
| C8       | 3.00  | 0.25 | 0.50 | 0.17 | 1.00  |
|          | 22.00 | 4.75 | 8.75 | 1.88 | 13.33 |

| Criteria | C1   | C7   | C6   | C5   | C8   | Everage (a) |
|----------|------|------|------|------|------|-------------|
| C1       | 0.05 | 0.04 | 0.03 | 0.07 | 0.03 | 0.04        |
| C7       | 0.27 | 0.21 | 0.34 | 0.18 | 0.30 | 0.26        |
| C6       | 0.18 | 0.07 | 0.11 | 0.13 | 0.15 | 0.13        |
| C5       | 0.36 | 0.63 | 0.46 | 0.53 | 0.45 | 0.49        |
| C8       | 0.14 | 0.05 | 0.06 | 0.09 | 0.08 | 0.08        |
|          | 1.00 | 1.00 | 1.00 | 1.00 | 1.00 | 1.00        |

| mmult(b) | (a x b) | Lamda | CI    | RI    | CR    |
|----------|---------|-------|-------|-------|-------|
| 0.204    | 5.088   | 5.176 | 0.044 | 1.188 | 0.037 |
| 1.382    | 5.299   |       |       |       |       |
| 0.663    | 5.105   |       |       |       |       |
| 2.602    | 5.342   |       |       |       |       |
| 0.414    | 5.046   |       |       |       |       |

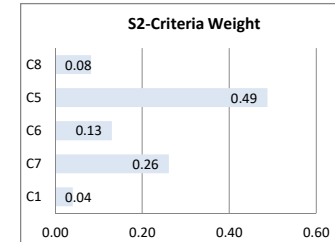

### S2.2 Scenario assessment based on (C1) integration transport system

|       | Sce 1 | Sce 2 | Sce 3 | Sce 4 |
|-------|-------|-------|-------|-------|
| Sce 1 | 1.00  | 0.33  | 0.20  | 0.14  |
| Sce 2 | 3.00  | 1.00  | 0.50  | 0.25  |
| Sce 3 | 5.00  | 2.00  | 1.00  | 0.33  |
| Sce 4 | 7.00  | 4.00  | 3.00  | 1.00  |
|       | 16.00 | 7.33  | 4.70  | 1.73  |

|       | Sce 1 | Sce 2 | Sce 3 | Sce 4 | Everage (a) |
|-------|-------|-------|-------|-------|-------------|
| Sce 1 | 0.06  | 0.05  | 0.04  | 0.08  | 0.0583      |
| Sce 2 | 0.19  | 0.14  | 0.11  | 0.14  | 0.1438      |
| Sce 3 | 0.31  | 0.27  | 0.21  | 0.19  | 0.2478      |
| Sce 4 | 0.44  | 0.55  | 0.64  | 0.58  | 0.5501      |
|       | 1.00  | 1.00  | 1.00  | 1.00  |             |

| mmult(b) | (a x b) | Lamda | CI    | RI    | CR    |
|----------|---------|-------|-------|-------|-------|
| 0.234    | 4.019   | 4.068 | 0.023 | 0.990 | 0.023 |
| 0.580    | 4.035   |       |       |       |       |
| 1.010    | 4.077   |       |       |       |       |
| 2.277    | 4.138   |       |       |       |       |

### S2.3 Scenario assessment based on (C7) low impact transportation system

|       | Sce 1 | Sce 2 | Sce 3 | Sce 4 |
|-------|-------|-------|-------|-------|
| Sce 1 | 1.00  | 0.17  | 0.25  | 0.13  |
| Sce 2 | 6.00  | 1.00  | 3.00  | 0.33  |
| Sce 3 | 4.00  | 0.33  | 1.00  | 0.25  |
| Sce 4 | 8.00  | 3.00  | 4.00  | 1.00  |
|       | 19.00 | 4.50  | 8.25  | 1.71  |

|       | Sce 1 | Sce 2 | Sce 3 | Sce 4 | Everage (a) |
|-------|-------|-------|-------|-------|-------------|
| Sce 1 | 0.05  | 0.04  | 0.03  | 0.07  | 0.0483      |
| Sce 2 | 0.32  | 0.22  | 0.36  | 0.20  | 0.2742      |
| Sce 3 | 0.21  | 0.07  | 0.12  | 0.15  | 0.1380      |
| Sce 4 | 0.42  | 0.67  | 0.48  | 0.59  | 0.5395      |
|       | 1.00  | 1.00  | 1.00  | 1.00  |             |

| mmult(b) | (a x b) | Lamda | CI    | RI    | CR    |
|----------|---------|-------|-------|-------|-------|
| 0.196    | 4.058   | 4.146 | 0.049 | 0.990 | 0.049 |
| 1.158    | 4.223   |       |       |       |       |
| 0.557    | 4.038   |       |       |       |       |
| 2.300    | 4.264   |       |       |       |       |

S2.4 Scenario assessment based on (C6) protection cultural assets

| Sce 1 | Sce 2 | Sce 3 | Sce 4 |      | Sce 1 | Sce 2 | Sce 3 | Sce 4 | Everage<br>(a) | mmult(b) | (a x b) | Lamda | CI    | RI    | CR    |       |
|-------|-------|-------|-------|------|-------|-------|-------|-------|----------------|----------|---------|-------|-------|-------|-------|-------|
| Sce 1 | 1.00  | 0.17  | 0.25  | 0.13 | Sce 1 | 0.05  | 0.04  | 0.03  | 0.07           | 0.0483   | 0.196   | 4.058 | 4.146 | 0.049 | 0.990 | 0.049 |
| Sce 2 | 6.00  | 1.00  | 3.00  | 0.33 | Sce 2 | 0.32  | 0.22  | 0.36  | 0.20           | 0.2742   | 1.158   | 4.223 |       |       |       |       |
| Sce 3 | 4.00  | 0.33  | 1.00  | 0.25 | Sce 3 | 0.21  | 0.07  | 0.12  | 0.15           | 0.1380   | 0.557   | 4.038 |       |       |       |       |
| Sce 4 | 8.00  | 3.00  | 4.00  | 1.00 | Sce 4 | 0.42  | 0.67  | 0.48  | 0.59           | 0.5395   | 2.300   | 4.264 |       |       |       |       |
| 19.00 | 4.50  | 8.25  | 1.71  |      | 1.00  | 1.00  | 1.00  | 1.00  |                |          |         |       |       |       |       |       |

S2.5 Scenario assessment based on (C5) comprehensif Planning

| Sce 1 | Sce 2 | Sce 3 | Sce 4 | 0 | Sce 1 | Sce 2 | Sce 3 | Sce 4 | Everage<br>(a) | mmult(b) | (a x b) | Lamda | CI    | RI    | CR    |       |       |
|-------|-------|-------|-------|---|-------|-------|-------|-------|----------------|----------|---------|-------|-------|-------|-------|-------|-------|
| Sce 1 | 1.00  | 0.17  | 0.25  |   | 0.13  | Sce 1 | 0.05  | 0.04  | 0.03           | 0.07     | 0.0483  | 0.196 | 4.058 | 4.146 | 0.049 | 0.990 | 0.049 |
| Sce 2 | 6.00  | 1.00  | 3.00  |   | 0.33  | Sce 2 | 0.32  | 0.22  | 0.36           | 0.20     | 0.2742  | 1.158 | 4.223 |       |       |       |       |
| Sce 3 | 4.00  | 0.33  | 1.00  |   | 0.25  | Sce 3 | 0.21  | 0.07  | 0.12           | 0.15     | 0.1380  | 0.557 | 4.038 |       |       |       |       |
| Sce 4 | 8.00  | 3.00  | 4.00  |   | 1.00  | Sce 4 | 0.42  | 0.67  | 0.48           | 0.59     | 0.5395  | 2.300 | 4.264 |       |       |       |       |
|       | 19.00 | 4.50  | 8.25  |   | 1.71  |       | 1.00  | 1.00  | 1.00           | 1.00     |         |       |       |       |       |       |       |
|       |       |       |       |   |       |       |       |       |                |          |         |       |       |       |       |       |       |

## S2.6 Scenario assessment based on (C8) visitor management

|       | Sce 1 | Sce 2 | Sce 3 | Sce 4 |
|-------|-------|-------|-------|-------|
| Sce 1 | 1.00  | 0.17  | 0.25  | 0.13  |
| Sce 2 | 6.00  | 1.00  | 3.00  | 0.33  |
| Sce 3 | 4.00  | 0.33  | 1.00  | 0.25  |
| Sce 4 | 8.00  | 3.00  | 4.00  | 1.00  |
|       | 19.00 | 4.50  | 8.25  | 1.71  |

|       | Sce 1 | Sce 2 | Sce 3 | Sce 4 | Everage (a) |
|-------|-------|-------|-------|-------|-------------|
| Sce 1 | 0.05  | 0.04  | 0.03  | 0.07  | 0.0483      |
| Sce 2 | 0.32  | 0.22  | 0.36  | 0.20  | 0.2742      |
| Sce 3 | 0.21  | 0.07  | 0.12  | 0.15  | 0.1380      |
| Sce 4 | 0.42  | 0.67  | 0.48  | 0.59  | 0.5395      |
|       | 1.00  | 1.00  | 1.00  | 1.00  |             |

| mmult(b) | (a x b) | Lamda | CI    | RI    | CR    |
|----------|---------|-------|-------|-------|-------|
| 0.196    | 4.058   | 4.146 | 0.049 | 0.990 | 0.049 |
| 1.158    | 4.223   |       |       |       |       |
| 0.557    | 4.038   |       |       |       |       |
| 2.300    | 4.264   |       |       |       |       |

## S2.7 Scenario Assessment by Natural Resources Conservation Center of Central Java

|       | C1     | C7     | C6     | C5     | C8     | BOBO T | Scenario Priority |
|-------|--------|--------|--------|--------|--------|--------|-------------------|
| Sce 1 | 0.0583 | 0.0483 | 0.0483 | 0.0483 | 0.0483 | 0.0402 | 4.87%             |
| Sce 2 | 0.1438 | 0.2742 | 0.2742 | 0.2742 | 0.2742 | 0.2608 | 26.90%            |
| Sce 3 | 0.2478 | 0.1380 | 0.1380 | 0.1380 | 0.1380 | 0.1299 | 14.24%            |
| Sce 4 | 0.5501 | 0.5395 | 0.5395 | 0.5395 | 0.5395 | 0.4871 | 53.99%            |
|       | 1.0000 | 1.0000 | 1.0000 | 1.0000 | 1.0000 | 0.0820 |                   |

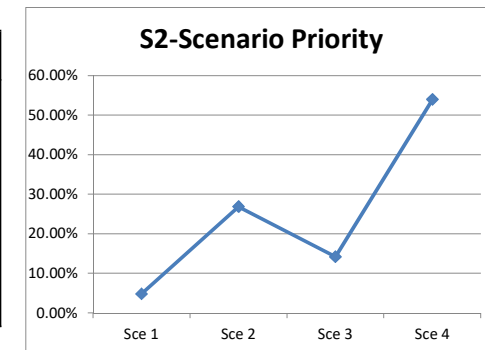

### S3. Regional Development Planning Agency of Central Java Province (Bappeda Jateng)

#### S3.1 Criteria Assessment by Regional Development Planning Agency of Central Java Province

| Criteria | C1   | C4    | C3   | C5   | C8    | C12   |
|----------|------|-------|------|------|-------|-------|
| C1       | 1.00 | 3.00  | 1.00 | 0.20 | 4.00  | 5.00  |
| C4       | 0.33 | 1.00  | 0.33 | 0.14 | 3.00  | 0.33  |
| C3       | 1.00 | 3.00  | 1.00 | 0.25 | 3.00  | 1.00  |
| C5       | 5.00 | 7.00  | 4.00 | 1.00 | 5.00  | 4.00  |
| C8       | 0.25 | 0.33  | 0.33 | 0.20 | 1.00  | 0.33  |
| C12      | 0.20 | 3.00  | 1.00 | 0.25 | 3.00  | 1.00  |
|          | 7.78 | 17.33 | 7.67 | 2.04 | 19.00 | 11.67 |

| Criteria | C1   | C4   | C3   | C5   | C8   | C12  | Everage (a) |
|----------|------|------|------|------|------|------|-------------|
| C1       | 0.13 | 0.17 | 0.13 | 0.10 | 0.21 | 0.43 | 0.19        |
| C4       | 0.04 | 0.06 | 0.04 | 0.07 | 0.16 | 0.03 | 0.07        |
| C3       | 0.13 | 0.17 | 0.13 | 0.12 | 0.16 | 0.09 | 0.13        |
| C5       | 0.64 | 0.40 | 0.52 | 0.49 | 0.26 | 0.34 | 0.44        |
| C8       | 0.03 | 0.02 | 0.04 | 0.10 | 0.05 | 0.03 | 0.05        |
| C12      | 0.03 | 0.17 | 0.13 | 0.12 | 0.16 | 0.09 | 0.12        |
|          | 1.00 | 1.00 | 1.00 | 1.00 | 1.00 | 1.00 | 1.00        |

mmult(b)

(a x b)

Lamda

CI

RI

CR

1.379

7.077

6.612

0.122

1.320

0.093

0.415

6.219

0.892

6.706

3.109

7.003

0.288

6.316

0.736

6.352

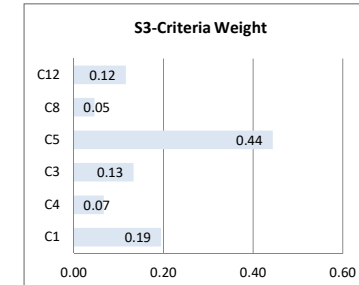

#### S3.2 Scenario assessment based on (C1) integrated transport system

|       | Sce 1 | Sce 2 | Sce 3 | Sce 4 |
|-------|-------|-------|-------|-------|
| Sce 1 | 1.00  | 0.33  | 0.14  | 0.20  |
| Sce 2 | 3.00  | 1.00  | 0.25  | 0.33  |
| Sce 3 | 7.00  | 4.00  | 1.00  | 3.00  |
| Sce 4 | 5.00  | 3.00  | 0.33  | 1.00  |
|       | 16.00 | 8.33  | 1.73  | 4.53  |

|       | Sce 1 | Sce 2 | Sce 3 | Sce 4 | Everage (a) |
|-------|-------|-------|-------|-------|-------------|
| Sce 1 | 0.06  | 0.04  | 0.08  | 0.04  | 0.0573      |
| Sce 2 | 0.19  | 0.12  | 0.14  | 0.07  | 0.1315      |
| Sce 3 | 0.44  | 0.48  | 0.58  | 0.66  | 0.5396      |
| Sce 4 | 0.31  | 0.36  | 0.19  | 0.22  | 0.2715      |
|       | 1.00  | 1.00  | 1.00  | 1.00  |             |

mmult(b)

(a x b)

Lamda

CI

RI

CR

0.233

4.056

4.119

0.040

0.990

0.040

0.529

4.023

2.282

4.228

1.133

4.171

#### S3.3 Scenario assessment based on (C4) various transport system

|       | Sce 1 | Sce 2 | Sce 3 | Sce 4 |
|-------|-------|-------|-------|-------|
| Sce 1 | 1.00  | 0.33  | 0.33  | 0.25  |
| Sce 2 | 3.00  | 1.00  | 0.33  | 0.20  |
| Sce 3 | 3.00  | 3.00  | 1.00  | 1.00  |
| Sce 4 | 4.00  | 5.00  | 1.00  | 1.00  |
|       | 11.00 | 9.33  | 2.67  | 2.45  |

|       | Sce 1 | Sce 2 | Sce 3 | Sce 4 | Everage (a) |
|-------|-------|-------|-------|-------|-------------|
| Sce 1 | 0.09  | 0.04  | 0.13  | 0.10  | 0.0884      |
| Sce 2 | 0.27  | 0.11  | 0.13  | 0.08  | 0.1466      |
| Sce 3 | 0.27  | 0.32  | 0.38  | 0.41  | 0.3443      |
| Sce 4 | 0.36  | 0.54  | 0.38  | 0.41  | 0.4206      |
|       | 1.00  | 1.00  | 1.00  | 1.00  |             |

mmult(b)

(a x b)

Lamda

CI

RI

CR

0.357

4.040

4.219

0.073

0.990

0.074

0.611

4.166

1.470

4.269

1.852

4.402

### S3.4 Scenario assessment based on (C3) Accesibility

|       | Sce 1 | Sce 2 | Sce 3 | Sce 4 |
|-------|-------|-------|-------|-------|
| Sce 1 | 1.00  | 0.20  | 0.14  | 0.25  |
| Sce 2 | 5.00  | 1.00  | 0.25  | 0.33  |
| Sce 3 | 7.00  | 4.00  | 1.00  | 1.00  |
| Sce 4 | 4.00  | 3.00  | 1.00  | 1.00  |
|       | 17.00 | 8.20  | 2.39  | 2.58  |

|       | Sce 1 | Sce 2 | Sce 3 | Sce 4 | Everage<br>(a) |
|-------|-------|-------|-------|-------|----------------|
| Sce 1 | 0.06  | 0.02  | 0.06  | 0.10  | 0.0599         |
| Sce 2 | 0.29  | 0.12  | 0.10  | 0.13  | 0.1624         |
| Sce 3 | 0.41  | 0.49  | 0.42  | 0.39  | 0.4261         |
| Sce 4 | 0.24  | 0.37  | 0.42  | 0.39  | 0.3515         |
|       | 1.00  | 1.00  | 1.00  | 1.00  |                |

| mmult(b) | (a x b) | Lamda | CI    | RI    | CR    |
|----------|---------|-------|-------|-------|-------|
| 0.241    | 4.025   | 4.215 | 0.072 | 0.990 | 0.072 |
| 0.686    | 4.223   |       |       |       |       |
| 1.847    | 4.334   |       |       |       |       |
| 1.505    | 4.280   |       |       |       |       |

### S3.5 Scenario assessment based on (C5) comprehensif planning

|       | Sce 1 | Sce 2 | Sce 3 | Sce 4 |
|-------|-------|-------|-------|-------|
| Sce 1 | 1.00  | 0.50  | 0.20  | 0.14  |
| Sce 2 | 2.00  | 1.00  | 0.33  | 0.33  |
| Sce 3 | 5.00  | 3.00  | 1.00  | 0.33  |
| Sce 4 | 7.00  | 3.00  | 3.00  | 1.00  |
|       | 15.00 | 7.50  | 4.53  | 1.81  |

|       | Sce 1 | Sce 2 | Sce 3 | Sce 4 | Everage<br>(a) |
|-------|-------|-------|-------|-------|----------------|
| Sce 1 | 0.07  | 0.07  | 0.04  | 0.08  | 0.0641         |
| Sce 2 | 0.13  | 0.13  | 0.07  | 0.18  | 0.1311         |
| Sce 3 | 0.33  | 0.40  | 0.22  | 0.18  | 0.2845         |
| Sce 4 | 0.47  | 0.40  | 0.66  | 0.55  | 0.5203         |
|       | 1.00  | 1.00  | 1.00  | 1.00  |                |

| mmult(b) | (a x b) | Lamda | CI    | RI    | CR    |
|----------|---------|-------|-------|-------|-------|
| 0.261    | 4.070   | 4.118 | 0.039 | 0.990 | 0.040 |
| 0.528    | 4.024   |       |       |       |       |
| 1.172    | 4.118   |       |       |       |       |
| 2.216    | 4.259   |       |       |       |       |

### S3.6 Scenario assessment based on (C8) visitor management

|       | Sce 1 | Sce 2 | Sce 3 | Sce 4 |
|-------|-------|-------|-------|-------|
| Sce 1 | 1.00  | 0.33  | 0.20  | 0.13  |
| Sce 2 | 3.00  | 1.00  | 0.33  | 0.33  |
| Sce 3 | 5.00  | 3.00  | 1.00  | 0.33  |
| Sce 4 | 8.00  | 3.00  | 3.00  | 1.00  |
|       | 17.00 | 7.33  | 4.53  | 1.79  |

|       | Sce 1 | Sce 2 | Sce 3 | Sce 4 | Everage (a) |
|-------|-------|-------|-------|-------|-------------|
| Sce 1 | 0.06  | 0.05  | 0.04  | 0.07  | 0.0545      |
| Sce 2 | 0.18  | 0.14  | 0.07  | 0.19  | 0.1431      |
| Sce 3 | 0.29  | 0.41  | 0.22  | 0.19  | 0.2775      |
| Sce 4 | 0.47  | 0.41  | 0.66  | 0.56  | 0.5249      |
|       | 1.00  | 1.00  | 1.00  | 1.00  |             |

| mmult(b) | (a x b) | Lamda | CI    | RI    | CR    |
|----------|---------|-------|-------|-------|-------|
| 0.223    | 4.095   | 4.126 | 0.042 | 0.990 | 0.042 |
| 0.574    | 4.012   |       |       |       |       |
| 1.154    | 4.161   |       |       |       |       |
| 2.223    | 4.235   |       |       |       |       |

### S3.7 Scenario assessment based on (C12) transport equality

|       | Sce 1 | Sce 2 | Sce 3 | Sce 4 |
|-------|-------|-------|-------|-------|
| Sce 1 | 1.00  | 0.33  | 0.20  | 0.14  |
| Sce 2 | 3.00  | 1.00  | 0.33  | 0.33  |
| Sce 3 | 5.00  | 3.00  | 1.00  | 0.33  |
| Sce 4 | 7.00  | 3.00  | 3.00  | 1.00  |
|       | 16.00 | 7.33  | 4.53  | 1.81  |

|       | Sce 1 | Sce 2 | Sce 3 | Sce 4 | Everage (a) |
|-------|-------|-------|-------|-------|-------------|
| Sce 1 | 0.06  | 0.05  | 0.04  | 0.08  | 0.0578      |
| Sce 2 | 0.19  | 0.14  | 0.07  | 0.18  | 0.1454      |
| Sce 3 | 0.31  | 0.41  | 0.22  | 0.18  | 0.2816      |
| Sce 4 | 0.44  | 0.41  | 0.66  | 0.55  | 0.5152      |
|       | 1.00  | 1.00  | 1.00  | 1.00  |             |

| mmult(b) | (a x b) | Lamda | CI    | RI    | CR    |
|----------|---------|-------|-------|-------|-------|
| 0.236    | 4.089   | 4.141 | 0.047 | 0.990 | 0.047 |
| 0.584    | 4.018   |       |       |       |       |
| 1.178    | 4.184   |       |       |       |       |
| 2.201    | 4.271   |       |       |       |       |

### S3.8 Scenario Assessment by Regional Development Planning Agency of Central Java Province

|       | C1     | C4     | C3     | C5     | C8     | C12    | Criteria Weight | S3-Scenario |
|-------|--------|--------|--------|--------|--------|--------|-----------------|-------------|
| Sce 1 | 0.0573 | 0.0884 | 0.0599 | 0.0641 | 0.0545 | 0.0578 | 0.1948          | 0.063       |
| Sce 2 | 0.1315 | 0.1466 | 0.1624 | 0.1311 | 0.1431 | 0.1454 | 0.0667          | 0.139       |
| Sce 3 | 0.5396 | 0.3443 | 0.4261 | 0.2845 | 0.2775 | 0.2816 | 0.1330          | 0.356       |
| Sce 4 | 0.2715 | 0.4206 | 0.3515 | 0.5203 | 0.5249 | 0.5152 | 0.4439          | 0.442       |
|       |        |        |        |        |        |        | 0.0457          |             |
|       |        |        |        |        |        |        | 0.1159          |             |

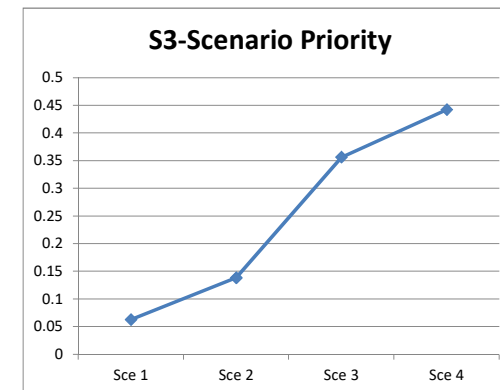

#### S4. Central Java Provincial Transportation Office (Dishub Jateng)

##### S4.1 Criteria Assessment by Provincial Transportation Agency of Central Java

| Criteria | C1    | C2   | C3   | C5   | C4    |
|----------|-------|------|------|------|-------|
| C1       | 1.00  | 0.20 | 0.33 | 0.20 | 3.00  |
| C2       | 5.00  | 1.00 | 4.00 | 0.33 | 3.00  |
| C3       | 3.00  | 0.25 | 1.00 | 0.25 | 2.00  |
| C5       | 5.00  | 3.00 | 4.00 | 1.00 | 7.00  |
| C4       | 0.20  | 0.33 | 0.50 | 0.14 | 1.00  |
|          | 14.20 | 4.78 | 9.83 | 1.93 | 16.00 |

| Criteria | C1   | C2   | C3   | C5   | C4   | Everage (a) |
|----------|------|------|------|------|------|-------------|
| C1       | 0.07 | 0.04 | 0.03 | 0.10 | 0.19 | 0.09        |
| C2       | 0.35 | 0.21 | 0.41 | 0.17 | 0.19 | 0.27        |
| C3       | 0.21 | 0.05 | 0.10 | 0.13 | 0.13 | 0.12        |
| C5       | 0.35 | 0.63 | 0.41 | 0.52 | 0.44 | 0.47        |
| C4       | 0.01 | 0.07 | 0.05 | 0.07 | 0.06 | 0.05        |
|          | 1.00 | 1.00 | 1.00 | 1.00 | 1.00 | 1.00        |

| mmult(b) | (a x b) | Lamda | CI    | RI    | CR    |
|----------|---------|-------|-------|-------|-------|
| 0.438    | 5.011   | 5.406 | 0.102 | 1.188 | 0.086 |
| 1.518    | 5.714   |       |       |       |       |
| 0.679    | 5.472   |       |       |       |       |
| 2.579    | 5.504   |       |       |       |       |
| 0.289    | 5.331   |       |       |       |       |

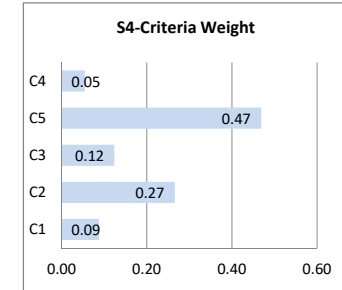

##### S4.2 Scenario assessment based on (C1) integrated transport system

| Criteria | Sce 1 | Sce 2 | Sce 3 | Sce 4 |
|----------|-------|-------|-------|-------|
| Sce 1    | 1.00  | 0.33  | 0.20  | 0.14  |
| Sce 2    | 3.00  | 1.00  | 0.33  | 0.25  |
| Sce 3    | 5.00  | 3.00  | 1.00  | 0.33  |
| Sce 4    | 7.00  | 4.00  | 3.00  | 1.00  |
|          | 16.00 | 8.33  | 4.53  | 1.73  |

|       | Sce 1 | Sce 2 | Sce 3 | Sce 4 | Everage (a) |
|-------|-------|-------|-------|-------|-------------|
| Sce 1 | 0.06  | 0.04  | 0.04  | 0.08  | 0.0573      |
| Sce 2 | 0.19  | 0.12  | 0.07  | 0.14  | 0.1315      |
| Sce 3 | 0.31  | 0.36  | 0.22  | 0.19  | 0.2715      |
| Sce 4 | 0.44  | 0.48  | 0.66  | 0.58  | 0.5396      |
|       | 1.00  | 1.00  | 1.00  | 1.00  |             |

| mmult(b) | (a x b) | Lamda | CI    | RI    | CR    |
|----------|---------|-------|-------|-------|-------|
| 0.233    | 4.056   | 4.119 | 0.040 | 0.990 | 0.040 |
| 0.529    | 4.023   |       |       |       |       |
| 1.133    | 4.171   |       |       |       |       |
| 2.282    | 4.228   |       |       |       |       |

##### S4.3 Scenario assessment based on (C2) Safety and security

|       | Sce 1 | Sce 2 | Sce 3 | Sce 4 |
|-------|-------|-------|-------|-------|
| Sce 1 | 1.00  | 0.33  | 0.20  | 0.14  |
| Sce 2 | 3.00  | 1.00  | 0.33  | 0.20  |
| Sce 3 | 5.00  | 3.00  | 1.00  | 0.33  |
| Sce 4 | 7.00  | 5.00  | 3.00  | 1.00  |
|       | 16.00 | 9.33  | 4.53  | 1.68  |

|       | Sce 1 | Sce 2 | Sce 3 | Sce 4 | Everage (a) |
|-------|-------|-------|-------|-------|-------------|
| Sce 1 | 0.06  | 0.04  | 0.04  | 0.09  | 0.0569      |
| Sce 2 | 0.19  | 0.11  | 0.07  | 0.12  | 0.1219      |
| Sce 3 | 0.31  | 0.32  | 0.22  | 0.20  | 0.2633      |
| Sce 4 | 0.44  | 0.54  | 0.66  | 0.60  | 0.5579      |
|       | 1.00  | 1.00  | 1.00  | 1.00  |             |

| mmult(b) | (a x b) | Lamda | CI    | RI    | CR    |
|----------|---------|-------|-------|-------|-------|
| 0.230    | 4.041   | 4.118 | 0.039 | 0.990 | 0.040 |
| 0.492    | 4.036   |       |       |       |       |
| 1.099    | 4.175   |       |       |       |       |
| 2.356    | 4.222   |       |       |       |       |

S4.4 Scenario assessment based on (C3) Accesibility

|       | Sce 1 | Sce 2 | Sce 3 | Sce 4 |
|-------|-------|-------|-------|-------|
| Sce 1 | 1.00  | 0.20  | 0.14  | 0.33  |
| Sce 2 | 5.00  | 1.00  | 0.33  | 3.00  |
| Sce 3 | 7.00  | 3.00  | 1.00  | 4.00  |
| Sce 4 | 3.00  | 0.33  | 0.25  | 1.00  |
|       | 16.00 | 4.53  | 1.73  | 8.33  |

|       | Sce 1 | Sce 2 | Sce 3 | Sce 4 | Everage<br>(a) | mmult(b) | (a x b) | Lamda | CI    | RI    | CR    |
|-------|-------|-------|-------|-------|----------------|----------|---------|-------|-------|-------|-------|
| Sce 1 | 0.06  | 0.04  | 0.08  | 0.04  | 0.0573         | 0.233    | 4.056   | 4.119 | 0.040 | 0.990 | 0.040 |
| Sce 2 | 0.31  | 0.22  | 0.19  | 0.36  | 0.2715         | 1.133    | 4.171   |       |       |       |       |
| Sce 3 | 0.44  | 0.66  | 0.58  | 0.48  | 0.5396         | 2.282    | 4.228   |       |       |       |       |
| Sce 4 | 0.19  | 0.07  | 0.14  | 0.12  | 0.1315         | 0.529    | 4.023   |       |       |       |       |
|       | 1.00  | 1.00  | 1.00  | 1.00  |                |          |         |       |       |       |       |

S4.5 Scenario assessment based on (C5) comprehensif planning

|       | Sce 1 | Sce 2 | Sce 3 | Sce 4 |
|-------|-------|-------|-------|-------|
| Sce 1 | 1.00  | 0.33  | 0.20  | 0.14  |
| Sce 2 | 3.00  | 1.00  | 0.33  | 0.20  |
| Sce 3 | 5.00  | 3.00  | 1.00  | 0.50  |
| Sce 4 | 7.00  | 5.00  | 2.00  | 1.00  |
|       | 16.00 | 9.33  | 3.53  | 1.84  |

|       | Sce 1 | Sce 2 | Sce 3 | Sce 4 | Everage<br>(a) | mmult(b) | (a x b) | Lamda | CI    | RI    | CR    |
|-------|-------|-------|-------|-------|----------------|----------|---------|-------|-------|-------|-------|
| Sce 1 | 0.06  | 0.04  | 0.06  | 0.08  | 0.0581         | 0.233    | 4.017   | 4.070 | 0.023 | 0.990 | 0.023 |
| Sce 2 | 0.19  | 0.11  | 0.09  | 0.11  | 0.1244         | 0.502    | 4.034   |       |       |       |       |
| Sce 3 | 0.31  | 0.32  | 0.28  | 0.27  | 0.2971         | 1.221    | 4.110   |       |       |       |       |
| Sce 4 | 0.44  | 0.54  | 0.57  | 0.54  | 0.5205         | 2.143    | 4.118   |       |       |       |       |
|       | 1.00  | 1.00  | 1.00  | 1.00  |                |          |         |       |       |       |       |



S4.6 Scenario assessment based on (C4) various transport system

|       | Sce 1 | Sce 2 | Sce 3 | Sce 4 |
|-------|-------|-------|-------|-------|
| Sce 1 | 1.00  | 0.33  | 0.14  | 0.20  |
| Sce 2 | 3.00  | 1.00  | 0.20  | 0.33  |
| Sce 3 | 7.00  | 5.00  | 1.00  | 3.00  |
| Sce 4 | 5.00  | 3.00  | 0.33  | 1.00  |
|       | 16.00 | 9.33  | 1.68  | 4.53  |

|       | Sce 1 | Sce 2 | Sce 3 | Sce 4 | Average (a) |
|-------|-------|-------|-------|-------|-------------|
| Sce 1 | 0.06  | 0.04  | 0.09  | 0.04  | 0.0569      |
| Sce 2 | 0.19  | 0.11  | 0.12  | 0.07  | 0.1219      |
| Sce 3 | 0.44  | 0.54  | 0.60  | 0.66  | 0.5579      |
| Sce 4 | 0.31  | 0.32  | 0.20  | 0.22  | 0.2633      |
|       | 1.00  | 1.00  | 1.00  | 1.00  |             |

| mmult(b) | (a x b) | Lamda | CI    | RI    | CR    |
|----------|---------|-------|-------|-------|-------|
| 0.230    | 4.041   | 4.118 | 0.039 | 0.990 | 0.040 |
| 0.492    | 4.036   |       |       |       |       |
| 2.356    | 4.222   |       |       |       |       |
| 1.099    | 4.175   |       |       |       |       |

S4.7 Scenario Assessment by Central Java Provincial Transportation Office

|       | C1.Integration Transport | C2.Safety and | C3.Accessibility | C5.Comprehensif | C4.Various transport | Criteria | S4-Scenario Priority |
|-------|--------------------------|---------------|------------------|-----------------|----------------------|----------|----------------------|
| Sce 1 | 0.0573                   | 0.0569        | 0.0573           | 0.0581          | 0.0569               | 0.0875   | 5.75%                |
| Sce 2 | 0.1315                   | 0.1219        | 0.2715           | 0.1244          | 0.1219               | 0.2657   | 14.24%               |
| Sce 3 | 0.2715                   | 0.2633        | 0.5396           | 0.2971          | 0.5579               | 0.1240   | 33.01%               |
| Sce 4 | 0.5396                   | 0.5579        | 0.1315           | 0.5205          | 0.2633               | 0.4685   | 46.99%               |
|       | 1.0000                   | 1.0000        | 1.0000           | 1.0000          | 1.0000               | 0.0543   | 100.00%              |
|       |                          |               |                  |                 |                      | 1.0000   |                      |

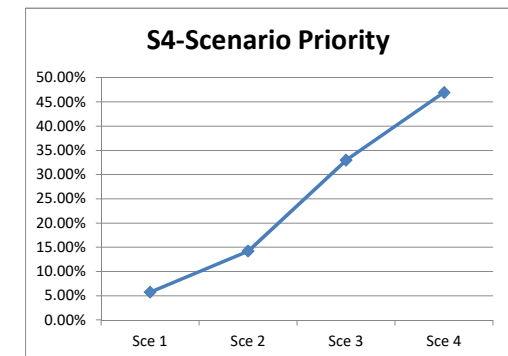

## S5. The Central Java Provincial Tourism Office (Dispar Jateng)

### S5.1 Criteria Assessment by The Central Java Provincial Tourism Office

| Criteria | C4    | C1   | C5   | C8   | C13   |
|----------|-------|------|------|------|-------|
| C4       | 1.00  | 0.20 | 0.14 | 0.25 | 0.50  |
| C1       | 5.00  | 1.00 | 0.33 | 0.33 | 5.00  |
| C5       | 7.00  | 3.00 | 1.00 | 1.00 | 4.00  |
| C8       | 4.00  | 3.00 | 0.20 | 1.00 | 1.00  |
| C13      | 2.00  | 0.20 | 0.25 | 1.00 | 1.00  |
|          | 19.00 | 7.40 | 1.93 | 3.58 | 11.50 |

| Criteria | C4   | C1   | C5   | C8   | C13  | Everage (a) |
|----------|------|------|------|------|------|-------------|
| C4       | 0.05 | 0.03 | 0.07 | 0.07 | 0.04 | 0.053       |
| C1       | 0.26 | 0.14 | 0.17 | 0.09 | 0.43 | 0.220       |
| C5       | 0.37 | 0.41 | 0.52 | 0.28 | 0.35 | 0.384       |
| C8       | 0.21 | 0.41 | 0.10 | 0.28 | 0.09 | 0.217       |
| C13      | 0.11 | 0.03 | 0.13 | 0.28 | 0.09 | 0.126       |
|          | 1.00 | 1.00 | 1.00 | 1.00 | 1.00 | 1.00        |

| mmult(b) | (a x b) | Lamda | CI    | RI    | CR    |
|----------|---------|-------|-------|-------|-------|
| 0.269    | 5.042   | 5.448 | 0.112 | 1.188 | 0.094 |
| 1.315    | 5.984   |       |       |       |       |
| 2.137    | 5.565   |       |       |       |       |
| 1.293    | 5.953   |       |       |       |       |
| 0.590    | 4.693   |       |       |       |       |

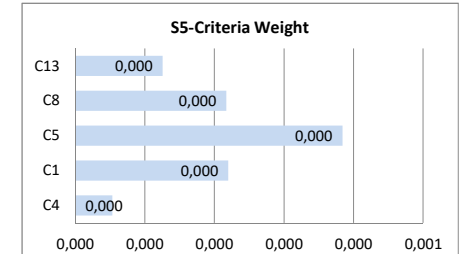

### S5.2 Scenario assessment based on (C4) various transport system

|       | Sce 1 | Sce 2 | Sce 3 | Sce 4 |
|-------|-------|-------|-------|-------|
| Sce 1 | 1.00  | 0.33  | 0.14  | 0.20  |
| Sce 2 | 3.00  | 1.00  | 0.20  | 0.33  |
| Sce 3 | 7.00  | 5.00  | 1.00  | 3.00  |
| Sce 4 | 5.00  | 3.00  | 0.33  | 1.00  |
|       | 16.00 | 9.33  | 1.68  | 4.53  |

|       | Sce 1 | Sce 2 | Sce 3 | Sce 4 | Everage (a) |
|-------|-------|-------|-------|-------|-------------|
| Sce 1 | 0.06  | 0.04  | 0.09  | 0.04  | 0.0569      |
| Sce 2 | 0.19  | 0.11  | 0.12  | 0.07  | 0.1219      |
| Sce 3 | 0.44  | 0.54  | 0.60  | 0.66  | 0.5579      |
| Sce 4 | 0.31  | 0.32  | 0.20  | 0.22  | 0.2633      |
|       | 1.00  | 1.00  | 1.00  | 1.00  |             |

| mmult(b) | (a x b) | Lamda | CI    | RI    | CR    |
|----------|---------|-------|-------|-------|-------|
| 0.230    | 4.041   | 4.118 | 0.039 | 0.990 | 0.040 |
| 0.492    | 4.036   |       |       |       |       |
| 2.356    | 4.222   |       |       |       |       |
| 1.099    | 4.175   |       |       |       |       |

### S5.3 Scenario assessment based on (C1) integrated transport system

|       | Sce 1 | Sce 2 | Sce 3 | Sce 4 |
|-------|-------|-------|-------|-------|
| Sce 1 | 1.00  | 0.25  | 0.14  | 0.20  |
| Sce 2 | 4.00  | 1.00  | 0.20  | 0.25  |
| Sce 3 | 7.00  | 5.00  | 1.00  | 3.00  |
| Sce 4 | 5.00  | 4.00  | 0.33  | 1.00  |
|       | 17.00 | 10.25 | 1.68  | 4.45  |

|       | Sce 1 | Sce 2 | Sce 3 | Sce 4 | Everage (a) |
|-------|-------|-------|-------|-------|-------------|
| Sce 1 | 0.06  | 0.02  | 0.09  | 0.04  | 0.0533      |
| Sce 2 | 0.24  | 0.10  | 0.12  | 0.06  | 0.1271      |
| Sce 3 | 0.41  | 0.49  | 0.60  | 0.67  | 0.5426      |
| Sce 4 | 0.29  | 0.39  | 0.20  | 0.22  | 0.2770      |
|       | 1.00  | 1.00  | 1.00  | 1.00  |             |

| mmult(b) | (a x b) | Lamda | CI    | RI    | CR    |
|----------|---------|-------|-------|-------|-------|
| 0.218    | 4.087   | 4.252 | 0.084 | 0.990 | 0.085 |
| 0.518    | 4.078   |       |       |       |       |
| 2.382    | 4.391   |       |       |       |       |
| 1.233    | 4.451   |       |       |       |       |

S5.4 Scenario assessment based on (C5) comprehensif planning

|       | Sce 1 | Sce 2 | Sce 3 | Sce 4 |
|-------|-------|-------|-------|-------|
| Sce 1 | 1.00  | 0.33  | 0.14  | 0.20  |
| Sce 2 | 3.00  | 1.00  | 0.20  | 0.33  |
| Sce 3 | 7.00  | 5.00  | 1.00  | 3.00  |
| Sce 4 | 5.00  | 3.00  | 0.33  | 1.00  |
|       | 16.00 | 9.33  | 1.68  | 4.53  |

|       | Sce 1 | Sce 2 | Sce 3 | Sce 4 | Everage<br>(a) |
|-------|-------|-------|-------|-------|----------------|
| Sce 1 | 0.06  | 0.04  | 0.09  | 0.04  | 0.0569         |
| Sce 2 | 0.19  | 0.11  | 0.12  | 0.07  | 0.1219         |
| Sce 3 | 0.44  | 0.54  | 0.60  | 0.66  | 0.5579         |
| Sce 4 | 0.31  | 0.32  | 0.20  | 0.22  | 0.2633         |
|       | 1.00  | 1.00  | 1.00  | 1.00  |                |

| mmult(b) | (a x b) | Lamda | CI    | RI    | CR    |
|----------|---------|-------|-------|-------|-------|
| 0.230    | 4.041   | 4.118 | 0.039 | 0.990 | 0.040 |
| 0.492    | 4.036   |       |       |       |       |
| 2.356    | 4.222   |       |       |       |       |
| 1.099    | 4.175   |       |       |       |       |

S5.5 Scenario assessment based on (C8) visitor management

|       | Sce 1 | Sce 2 | Sce 3 | Sce 4 |
|-------|-------|-------|-------|-------|
| Sce 1 | 1.00  | 0.33  | 0.17  | 0.25  |
| Sce 2 | 3.00  | 1.00  | 0.20  | 0.33  |
| Sce 3 | 6.00  | 5.00  | 1.00  | 3.00  |
| Sce 4 | 4.00  | 3.00  | 0.33  | 1.00  |
|       | 14.00 | 9.33  | 1.70  | 4.58  |

|       | Sce 1 | Sce 2 | Sce 3 | Sce 4 | Everage<br>(a) |
|-------|-------|-------|-------|-------|----------------|
| Sce 1 | 0.07  | 0.04  | 0.10  | 0.05  | 0.0649         |
| Sce 2 | 0.21  | 0.11  | 0.12  | 0.07  | 0.1280         |
| Sce 3 | 0.43  | 0.54  | 0.59  | 0.65  | 0.5518         |
| Sce 4 | 0.29  | 0.32  | 0.20  | 0.22  | 0.2554         |
|       | 1.00  | 1.00  | 1.00  | 1.00  |                |

| mmult(b) | (a x b) | Lamda | CI    | RI    | CR    |
|----------|---------|-------|-------|-------|-------|
| 0.263    | 4.056   | 4.150 | 0.050 | 0.990 | 0.051 |
| 0.518    | 4.050   |       |       |       |       |
| 2.347    | 4.254   |       |       |       |       |
| 1.083    | 4.241   |       |       |       |       |

S5.6 Scenario assessment based on (C13) suporting cultural event

|       | Sce 1 | Sce 2 | Sce 3 | Sce 4 |
|-------|-------|-------|-------|-------|
| Sce 1 | 1.00  | 0.33  | 0.20  | 0.14  |
| Sce 2 | 3.00  | 1.00  | 0.33  | 0.20  |
| Sce 3 | 5.00  | 3.00  | 1.00  | 0.33  |
| Sce 4 | 7.00  | 5.00  | 3.00  | 1.00  |
|       | 16.00 | 9.33  | 4.53  | 1.68  |

|       | Sce 1 | Sce 2 | Sce 3 | Sce 4 | Everage (a) |
|-------|-------|-------|-------|-------|-------------|
| Sce 1 | 0.06  | 0.04  | 0.04  | 0.09  | 0.0569      |
| Sce 2 | 0.19  | 0.11  | 0.07  | 0.12  | 0.1219      |
| Sce 3 | 0.31  | 0.32  | 0.22  | 0.20  | 0.2633      |
| Sce 4 | 0.44  | 0.54  | 0.66  | 0.60  | 0.5579      |
|       | 1.00  | 1.00  | 1.00  | 1.00  |             |

| mmult(b) | (a x b) | Lamda | CI    | RI    | CR    |
|----------|---------|-------|-------|-------|-------|
| 0.230    | 4.041   | 4.118 | 0.039 | 0.990 | 0.040 |
| 0.492    | 4.036   |       |       |       |       |
| 1.099    | 4.175   |       |       |       |       |
| 2.356    | 4.222   |       |       |       |       |

S5.7 Scenario Assessment by The Central Java Provincial Tourism Office

|       | C4     | C1     | C5     | C8     | C13    | Kriteria | S5-Scenario |
|-------|--------|--------|--------|--------|--------|----------|-------------|
| Sce 1 | 0.0569 | 0.0533 | 0.0569 | 0.0649 | 0.0569 | 0.0534   | 5.79%       |
| Sce 2 | 0.1219 | 0.1271 | 0.1219 | 0.1280 | 0.1219 | 0.2198   | 12.43%      |
| Sce 3 | 0.5579 | 0.5426 | 0.5579 | 0.5518 | 0.2633 | 0.3840   | 51.62%      |
| Sce 4 | 0.2633 | 0.2770 | 0.2633 | 0.2554 | 0.5579 | 0.2172   | 30.16%      |
|       |        |        |        |        |        | 0.1256   |             |

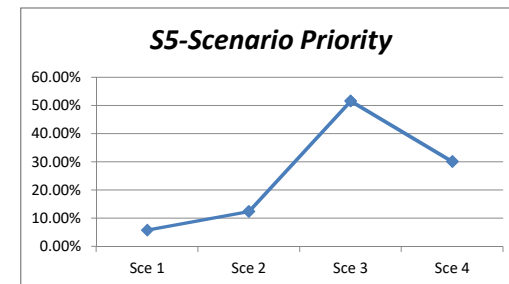

## S6. The Central Java Land Transport Organization (ORGANDA Jateng)

### S6.1 Criteria Assessment by The Central Java Land Transport Organization

| Criteria | C4    | C1   | C5   | C2   |
|----------|-------|------|------|------|
| C4       | 1.00  | 0.33 | 0.20 | 0.14 |
| C1       | 3.00  | 1.00 | 0.33 | 0.25 |
| C5       | 5.00  | 3.00 | 1.00 | 0.33 |
| C2       | 7.00  | 4.00 | 3.00 | 1.00 |
|          | 16.00 | 8.33 | 4.53 | 1.73 |

| Criteria | C4   | C1   | C5   | C2   | Everage (a) |
|----------|------|------|------|------|-------------|
| C4       | 0.06 | 0.04 | 0.04 | 0.08 | 0.06        |
| C1       | 0.19 | 0.12 | 0.07 | 0.14 | 0.13        |
| C5       | 0.31 | 0.36 | 0.22 | 0.19 | 0.27        |
| C2       | 0.44 | 0.48 | 0.66 | 0.58 | 0.54        |
|          | 1.00 | 1.00 | 1.00 | 1.00 |             |

|    | mmult(b)<br>(a x b) | Lamda | CI    | RI    | CR    |
|----|---------------------|-------|-------|-------|-------|
| C4 | 0.233               | 4.056 | 4.119 | 0.040 | 0.990 |
| C1 | 0.529               | 4.023 |       |       | 0.040 |
| C5 | 1.133               | 4.171 |       |       |       |
| C2 | 2.282               | 4.228 |       |       |       |

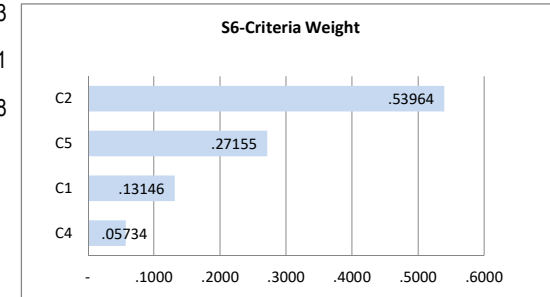

### S6.2 Scenario assessment based on (C4) Various transport System

|       | Sce 1 | Sce 2 | Sce 3 | Sce 4 |
|-------|-------|-------|-------|-------|
| Sce 1 | 1.00  | 0.33  | 0.14  | 0.20  |
| Sce 2 | 3.00  | 1.00  | 0.20  | 0.33  |
| Sce 3 | 7.00  | 5.00  | 1.00  | 3.00  |
| Sce 4 | 5.00  | 3.00  | 0.33  | 1.00  |
|       | 16.00 | 9.33  | 1.68  | 4.53  |

|       | Sce 1 | Sce 2 | Sce 3 | Sce 4 | Everage (a) |
|-------|-------|-------|-------|-------|-------------|
| Sce 1 | 0.06  | 0.04  | 0.09  | 0.04  | 5.69%       |
| Sce 2 | 0.19  | 0.11  | 0.12  | 0.07  | 12.19%      |
| Sce 3 | 0.44  | 0.54  | 0.60  | 0.66  | 55.79%      |
| Sce 4 | 0.31  | 0.32  | 0.20  | 0.22  | 26.33%      |
|       | 1.00  | 1.00  | 1.00  | 1.00  |             |

|       | mmult(b)<br>(a x b) | Lamda | CI    | RI    | CR    |
|-------|---------------------|-------|-------|-------|-------|
| Sce 1 | 0.230               | 4.041 | 4.118 | 0.039 | 0.990 |
| Sce 2 | 0.492               | 4.036 |       |       | 0.040 |
| Sce 3 | 2.356               | 4.222 |       |       |       |
| Sce 4 | 1.099               | 4.175 |       |       |       |

### S6.3 Scenario assessment based on (C1) Integration Transport System

|       | Sce 1 | Sce 2 | Sce 3 | Sce 4 |
|-------|-------|-------|-------|-------|
| Sce 1 | 1.00  | 0.33  | 0.14  | 0.20  |
| Sce 2 | 3.00  | 1.00  | 0.25  | 0.33  |
| Sce 3 | 7.00  | 4.00  | 1.00  | 3.00  |
| Sce 4 | 5.00  | 3.00  | 0.33  | 1.00  |
|       | 16.00 | 8.33  | 1.73  | 4.53  |

|       | Sce 1 | Sce 2 | Sce 3 | Sce 4 | Everage (a) |
|-------|-------|-------|-------|-------|-------------|
| Sce 1 | 0.06  | 0.04  | 0.08  | 0.04  | 5.73%       |
| Sce 2 | 0.19  | 0.12  | 0.14  | 0.07  | 13.15%      |
| Sce 3 | 0.44  | 0.48  | 0.58  | 0.66  | 53.96%      |
| Sce 4 | 0.31  | 0.36  | 0.19  | 0.22  | 27.15%      |
|       | 1.00  | 1.00  | 1.00  | 1.00  |             |

|       | mmult(b)<br>(a x b) | Lamda | CI    | RI    | CR    |
|-------|---------------------|-------|-------|-------|-------|
| Sce 1 | 0.233               | 4.056 | 4.119 | 0.040 | 0.990 |
| Sce 2 | 0.529               | 4.023 |       |       | 0.040 |
| Sce 3 | 2.282               | 4.228 |       |       |       |
| Sce 4 | 1.133               | 4.171 |       |       |       |

S6.4 Scenario assessment based on (C5) Comprehensive Planning

| Sce 1 | Sce 2 | Sce 3 | Sce 4 |      | Sce 1 | Sce 2 | Sce 3 | Sce 4 | Everage (a) | mmult(b)<br>(a x b) | Lamda | CI    | RI    | CR    |       |       |
|-------|-------|-------|-------|------|-------|-------|-------|-------|-------------|---------------------|-------|-------|-------|-------|-------|-------|
| Sce 1 | 1.00  | 0.33  | 0.20  | 0.14 | Sce 1 | 0.06  | 0.04  | 0.04  | 0.09        | 5.69%               | 0.230 | 4.041 | 4.118 | 0.039 | 0.990 | 0.040 |
| Sce 2 | 3.00  | 1.00  | 0.33  | 0.20 | Sce 2 | 0.19  | 0.11  | 0.07  | 0.12        | 12.19%              | 0.492 | 4.036 |       |       |       |       |
| Sce 3 | 5.00  | 3.00  | 1.00  | 0.33 | Sce 3 | 0.31  | 0.32  | 0.22  | 0.20        | 26.33%              | 1.099 | 4.175 |       |       |       |       |
| Sce 4 | 7.00  | 5.00  | 3.00  | 1.00 | Sce 4 | 0.44  | 0.54  | 0.66  | 0.60        | 55.79%              | 2.356 | 4.222 |       |       |       |       |
| 16.00 | 9.33  | 4.53  | 1.68  |      | 1.00  | 1.00  | 1.00  | 1.00  |             |                     |       |       |       |       |       |       |

S6.5 Scenario assessment based on (C2) Safety and security

| Sce 1 | Sce 2 | Sce 3 | Sce 4 |      | Sce 1 | Sce 2 | Sce 3 | Sce 4 | Everage (a) | mmult(b)<br>) | (a x b) | Lamda | CI    | RI    | CR    |       |
|-------|-------|-------|-------|------|-------|-------|-------|-------|-------------|---------------|---------|-------|-------|-------|-------|-------|
| Sce 1 | 1.00  | 0.33  | 0.14  | 0.20 | Sce 1 | 0.06  | 0.05  | 0.08  | 0.04        | 5.78%         | 0.236   | 4.089 | 4.141 | 0.047 | 0.990 | 0.047 |
| Sce 2 | 3.00  | 1.00  | 0.33  | 0.33 | Sce 2 | 0.19  | 0.14  | 0.18  | 0.07        | 14.54%        | 0.584   | 4.018 |       |       |       |       |
| Sce 3 | 7.00  | 3.00  | 1.00  | 3.00 | Sce 3 | 0.44  | 0.41  | 0.55  | 0.66        | 51.52%        | 2.201   | 4.271 |       |       |       |       |
| Sce 4 | 5.00  | 3.00  | 0.33  | 1.00 | Sce 4 | 0.31  | 0.41  | 0.18  | 0.22        | 28.16%        | 1.178   | 4.184 |       |       |       |       |
| 16.00 | 7.33  | 1.81  | 4.53  |      | 1.00  | 1.00  | 1.00  | 1.00  |             |               |         |       |       |       |       |       |

S6.6 Scenario assessment by The Central Java Land Transport Organization

|       | C4     | C1     | C5     | C2     | Kriteria | S6-<br>Scenario |
|-------|--------|--------|--------|--------|----------|-----------------|
| Sce 1 | 0.0569 | 0.0573 | 0.0569 | 0.0578 | 0.0573   | 5.7%            |
| Sce 2 | 0.1219 | 0.1315 | 0.1219 | 0.1454 | 0.1315   | 13.6%           |
| Sce 3 | 0.5579 | 0.5396 | 0.2633 | 0.5152 | 0.2715   | 45.2%           |
| Sce 4 | 0.2633 | 0.2715 | 0.5579 | 0.2816 | 0.5396   | 35.4%           |
|       | 1.0000 | 1.0000 | 1.0000 | 1.0000 | 1.0000   | 1.0000          |

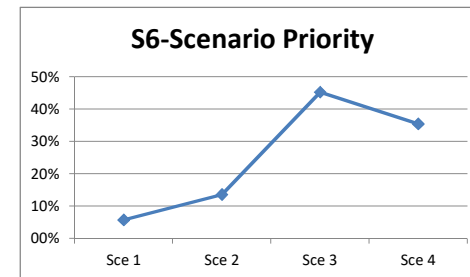

## S7. Regional Planning and Development Agency of Wonosobo Regency (Bappeda Wonosobo).

### S7.1 Criteria assessment by Regional Planning and Development Agency of Wonosobo Regency (Bappeda Wonosobo),

| Criteria | C1    | C4   | C3    | C5   |
|----------|-------|------|-------|------|
| C1       | 1.00  | 0.33 | 0.20  | 0.33 |
| C4       | 3.00  | 1.00 | 3.00  | 0.20 |
| C3       | 5.00  | 0.33 | 1.00  | 0.14 |
| C5       | 3.00  | 5.00 | 7.00  | 1.00 |
|          | 12.00 | 6.67 | 11.20 | 1.68 |
|          |       |      |       | 0.00 |

| Criteria | C1   | C4   | C3   | C5   | Everage (a) |
|----------|------|------|------|------|-------------|
| C1       | 0.08 | 0.05 | 0.02 | 0.20 | 0.09        |
| C4       | 0.25 | 0.15 | 0.27 | 0.12 | 0.20        |
| C3       | 0.42 | 0.05 | 0.09 | 0.09 | 0.16        |
| C5       | 0.25 | 0.75 | 0.63 | 0.60 | 0.56        |
|          | 1.00 | 1.00 | 1.00 | 1.00 | 0.00        |

| mmult(b) | (a x b) | $\lambda$ | CI    | RI    | CR    |
|----------|---------|-----------|-------|-------|-------|
| 0.370    | 4.231   | 4.231     | 0.077 | 0.990 | 0.078 |
| 1.051    | 5.342   |           |       |       |       |
| 0.743    | 4.634   |           |       |       |       |
| 2.924    | 5.265   |           |       |       |       |

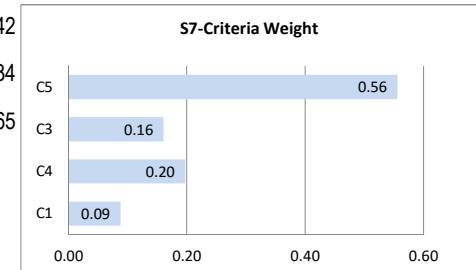

### S7.2 Scenario assessment based on (C1) Integration Transport System

| SCENAR | Sce 1 | Sce 2 | Sce 3 | Sce 4 |
|--------|-------|-------|-------|-------|
| Sce 1  | 1.00  | 0.33  | 0.14  | 3.00  |
| Sce 2  | 3.00  | 1.00  | 0.33  | 2.00  |
| Sce 3  | 7.00  | 3.00  | 1.00  | 5.00  |
| Sce 4  | 0.33  | 0.50  | 0.20  | 1.00  |
|        | 11.33 | 4.83  | 1.68  | 11.00 |

| Scenario | Sce 1 | Sce 2 | Sce 3 | Sce 4 | Everage (a) |
|----------|-------|-------|-------|-------|-------------|
| Sce 1    | 0.09  | 0.07  | 0.09  | 0.27  | 0.1288      |
| Sce 2    | 0.26  | 0.21  | 0.20  | 0.18  | 0.2131      |
| Sce 3    | 0.62  | 0.62  | 0.60  | 0.45  | 0.5724      |
| Sce 4    | 0.03  | 0.10  | 0.12  | 0.09  | 0.0858      |
|          | 1.00  | 1.00  | 1.00  | 1.00  |             |

| mmult(b) | (a x b) | Lamda | CI    | RI    | CR    |
|----------|---------|-------|-------|-------|-------|
| 0.539    | 4.184   | 4.184 | 0.061 | 0.990 | 0.062 |
| 0.962    | 4.514   |       |       |       |       |
| 2.542    | 4.441   |       |       |       |       |
| 0.350    | 4.077   |       |       |       |       |

### S7.3 Scenario assessment based on (C4) Various transport System

|       | Sce 1 | Sce 2 | Sce 3 | Sce 4 |
|-------|-------|-------|-------|-------|
| Sce 1 | 1.00  | 0.33  | 0.20  | 0.14  |
| Sce 2 | 3.00  | 1.00  | 0.33  | 0.20  |
| Sce 3 | 5.00  | 3.00  | 1.00  | 0.50  |
| Sce 4 | 7.00  | 5.00  | 2.00  | 1.00  |
|       | 16.00 | 9.33  | 3.53  | 1.84  |

| scenario | Sce 1 | Sce 2 | Sce 3 | Sce 4 | Everage (a) |
|----------|-------|-------|-------|-------|-------------|
| Sce 1    | 0.06  | 0.04  | 0.06  | 0.08  | 0.0581      |
| Sce 2    | 0.19  | 0.11  | 0.09  | 0.11  | 0.1244      |
| Sce 3    | 0.31  | 0.32  | 0.28  | 0.27  | 0.2971      |
| Sce 4    | 0.44  | 0.54  | 0.57  | 0.54  | 0.5205      |
|          | 1.00  | 1.00  | 1.00  | 1.00  |             |

| mmult(b) | (a x b) | Lamda | CI    | RI    | CR    |
|----------|---------|-------|-------|-------|-------|
| 0.233    | 4.017   | 4.017 | 0.006 | 0.990 | 0.006 |
| 0.502    | 4.034   |       |       |       |       |
| 1.221    | 4.110   |       |       |       |       |
| 2.143    | 4.118   |       |       |       |       |



S7.4 Scenario assessment based on (C3) Accesibility

|       | Sce 1 | Sce 2 | Sce 3 | Sce 4 |
|-------|-------|-------|-------|-------|
| Sce 1 | 1.00  | 0.33  | 0.14  | 0.20  |
| Sce 2 | 3.00  | 1.00  | 0.25  | 0.33  |
| Sce 3 | 7.00  | 4.00  | 1.00  | 3.00  |
| Sce 4 | 5.00  | 3.00  | 0.33  | 1.00  |
|       | 16.00 | 8.33  | 1.73  | 4.53  |

| Scenario | Sce 1 | Sce 2 | Sce 3 | Sce 4 | Everage<br>(a) |
|----------|-------|-------|-------|-------|----------------|
| Sce 1    | 0.06  | 0.04  | 0.08  | 0.04  | 0.0573         |
| Sce 2    | 0.19  | 0.12  | 0.14  | 0.07  | 0.1315         |
| Sce 3    | 0.44  | 0.48  | 0.58  | 0.66  | 0.5396         |
| Sce 4    | 0.31  | 0.36  | 0.19  | 0.22  | 0.2715         |
|          | 1.00  | 1.00  | 1.00  | 1.00  |                |

| mmult(b) | (a x b) | Lamda | CI    | RI    | CR    |
|----------|---------|-------|-------|-------|-------|
| 0.233    | 4.056   | 4.056 | 0.019 | 0.990 | 0.019 |
| 0.529    | 4.023   |       |       |       |       |
| 2.282    | 4.228   |       |       |       |       |
| 1.133    | 4.171   |       |       |       |       |

S7.5 Scenario assessment based on (C5) Comprehensif Planning

|       | Sce 1 | Sce 2 | Sce 3 | Sce 4 |
|-------|-------|-------|-------|-------|
| Sce 1 | 1.00  | 0.33  | 0.17  | 0.20  |
| Sce 2 | 3.00  | 1.00  | 0.25  | 0.33  |
| Sce 3 | 6.00  | 4.00  | 1.00  | 3.00  |
| Sce 4 | 5.00  | 3.00  | 0.33  | 1.00  |
|       | 15.00 | 8.33  | 1.75  | 4.53  |

| Scenario | Sce 1 | Sce 2 | Sce 3 | Sce 4 | Everage<br>(a) |
|----------|-------|-------|-------|-------|----------------|
| Sce 1    | 0.07  | 0.04  | 0.10  | 0.04  | 0.0615         |
| Sce 2    | 0.20  | 0.12  | 0.14  | 0.07  | 0.1341         |
| Sce 3    | 0.40  | 0.48  | 0.57  | 0.66  | 0.5283         |
| Sce 4    | 0.33  | 0.36  | 0.19  | 0.22  | 0.2761         |
|          | 1.00  | 1.00  | 1.00  | 1.00  |                |

| mmult(b) | (a x b) | Lamda | CI    | RI    | CR    |
|----------|---------|-------|-------|-------|-------|
| 0.249    | 4.056   | 4.056 | 0.019 | 0.990 | 0.019 |
| 0.543    | 4.047   |       |       |       |       |
| 2.262    | 4.282   |       |       |       |       |
| 1.162    | 4.209   |       |       |       |       |

S7.6 Scenario assessment by Regional Planning and Development Agency of Wonosobo Regency (Bappeda Wonosobo),

|       | C1     | C4     | C3     | C5     | Criteria Weight | S7-Scenario |
|-------|--------|--------|--------|--------|-----------------|-------------|
| Sce 1 | 0.1288 | 0.0581 | 0.0573 | 0.0615 | 0.0875          | 6.61%       |
| Sce 2 | 0.2131 | 0.1244 | 0.1315 | 0.1341 | 0.1968          | 13.87%      |
| Sce 3 | 0.5724 | 0.2971 | 0.5396 | 0.5283 | 0.1603          | 48.85%      |
| Sce 4 | 0.0858 | 0.5205 | 0.2715 | 0.2761 | 0.5554          | 30.68%      |
|       | 1.0000 | 1.0000 | 1.0000 | 1.0000 | 1.0000          | 100.00%     |

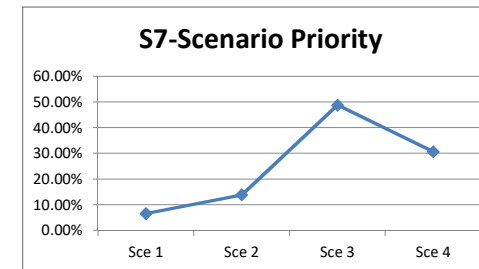

## S8. Transportation Office of Wonosobo Regency (Dishub Wonosobo)

### S8.1 Criteria assessment by Transportation Office of Wonosobo Regency (Dishub Wonosobo)

| Criteria | C1    | C2   | C3   | C5   | C8   |
|----------|-------|------|------|------|------|
| C1       | 1.00  | 0.20 | 0.33 | 0.25 | 0.25 |
| C2       | 5.00  | 1.00 | 5.00 | 0.33 | 1.00 |
| C3       | 3.00  | 0.20 | 1.00 | 1.00 | 1.00 |
| C5       | 4.00  | 3.00 | 1.00 | 1.00 | 1.00 |
| C8       | 4.00  | 1.00 | 1.00 | 1.00 | 1.00 |
|          | 17.00 | 5.40 | 8.33 | 3.58 | 4.25 |

| Criteria | C1   | C2   | C3   | C5   | C8   | Everage (a) |
|----------|------|------|------|------|------|-------------|
| C1       | 0.06 | 0.04 | 0.04 | 0.07 | 0.06 | 0.05        |
| C2       | 0.29 | 0.19 | 0.60 | 0.09 | 0.24 | 0.28        |
| C3       | 0.18 | 0.04 | 0.12 | 0.28 | 0.24 | 0.17        |
| C5       | 0.24 | 0.56 | 0.12 | 0.28 | 0.24 | 0.29        |
| C8       | 0.24 | 0.19 | 0.12 | 0.28 | 0.24 | 0.21        |
|          | 1.00 | 1.00 | 1.00 | 1.00 | 1.00 |             |

mmult(b)

(a x b)

Lamda

CI

RI

CR

0.290

5.478

5.48

0.12

1.19

0.10

1.700

6.038

0.881

5.193

1.722

6.040

1.159

5.492

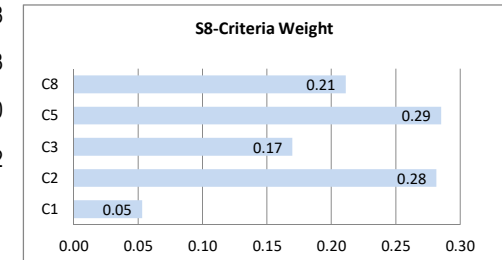

### S8.2 Scenario assessment based on (C1) Integration Transport System

| Criteria | Sce 1 | Sce 2 | Sce 3 | Sce 4 |
|----------|-------|-------|-------|-------|
| Sce 1    | 1.00  | 0.33  | 0.14  | 0.20  |
| Sce 2    | 3.00  | 1.00  | 0.20  | 0.33  |
| Sce 3    | 7.00  | 5.00  | 1.00  | 3.00  |
| Sce 4    | 5.00  | 3.00  | 0.33  | 1.00  |
|          | 16.00 | 9.33  | 1.68  | 4.53  |

| Criteria | Sce 1 | Sce 2 | Sce 3 | Sce 4 | Everage (a) |
|----------|-------|-------|-------|-------|-------------|
| Sce 1    | 0.06  | 0.04  | 0.09  | 0.04  | 0.0569      |
| Sce 2    | 0.19  | 0.11  | 0.12  | 0.07  | 0.1219      |
| Sce 3    | 0.44  | 0.54  | 0.60  | 0.66  | 0.5579      |
| Sce 4    | 0.31  | 0.32  | 0.20  | 0.22  | 0.2633      |
|          | 1.00  | 1.00  | 1.00  | 1.00  |             |

mmult(b)

(a x b)

Lamda

CI

RI

CR

0.230

4.041

4.041

0.014

0.99

0.0137

0.492

4.036

2.356

4.222

1.099

4.175

### S8.3 Scenario assessment based on (C2) Safety and security

| Criteria | Sce 1 | Sce 2 | Sce 3 | Sce 4 |
|----------|-------|-------|-------|-------|
| Sce 1    | 1.00  | 0.33  | 0.14  | 0.20  |
| Sce 2    | 3.00  | 1.00  | 0.20  | 0.33  |
| Sce 3    | 7.00  | 5.00  | 1.00  | 3.00  |
| Sce 4    | 5.00  | 3.00  | 0.33  | 1.00  |
|          | 16.00 | 9.33  | 1.68  | 4.53  |

| Criteria | Sce 1 | Sce 2 | Sce 3 | Sce 4 | Everage (a) |
|----------|-------|-------|-------|-------|-------------|
| Sce 1    | 0.06  | 0.04  | 0.09  | 0.04  | 0.0569      |
| Sce 2    | 0.19  | 0.11  | 0.12  | 0.07  | 0.1219      |
| Sce 3    | 0.44  | 0.54  | 0.60  | 0.66  | 0.5579      |
| Sce 4    | 0.31  | 0.32  | 0.20  | 0.22  | 0.2633      |
|          | 1.00  | 1.00  | 1.00  | 1.00  |             |

mmult(b)

(a x b)

Lamda

CI

RI

CR

0.23

4.04

4.12

0.04

0.99

0.04

0.49

4.04

2.36

4.22

1.10

4.17

S8.4 Scenario assessment based on (C3) Accesibility

| Criteria | Sce 1 | Sce 2 | Sce 3 | Sce 4 |
|----------|-------|-------|-------|-------|
| Sce 1    | 1.00  | 0.20  | 0.33  | 0.25  |
| Sce 2    | 5.00  | 1.00  | 5.00  | 0.33  |
| Sce 3    | 3.00  | 0.20  | 1.00  | 1.00  |
| Sce 4    | 4.00  | 3.00  | 1.00  | 1.00  |
|          | 13.00 | 4.40  | 7.33  | 2.58  |

| Criteria | Sce 1 | Sce 2 | Sce 3 | Sce 4 | Everage<br>(a) | mmult(b) | (a x b) | Lamda | CI   | RI   | CR   |
|----------|-------|-------|-------|-------|----------------|----------|---------|-------|------|------|------|
| Sce 1    | 0.08  | 0.05  | 0.05  | 0.10  | 0.0662         | 0.30     | 4.51    | 4.72  | 0.24 | 0.99 | 0.24 |
| Sce 2    | 0.38  | 0.23  | 0.68  | 0.13  | 0.3557         | 1.81     | 5.09    |       |      |      |      |
| Sce 3    | 0.23  | 0.05  | 0.14  | 0.39  | 0.1999         | 0.85     | 4.24    |       |      |      |      |
| Sce 4    | 0.31  | 0.68  | 0.14  | 0.39  | 0.3782         | 1.91     | 5.05    |       |      |      |      |
|          | 1.00  | 1.00  | 1.00  | 1.00  |                |          |         |       |      |      |      |

S8.5 Scenario assessment based on (C5) Comprehensif Planning

| Criteria | Sce 1 | Sce 2 | Sce 3 | Sce 4 |
|----------|-------|-------|-------|-------|
| Sce 1    | 1.00  | 0.33  | 0.17  | 0.20  |
| Sce 2    | 3.00  | 1.00  | 0.25  | 0.33  |
| Sce 3    | 6.00  | 4.00  | 1.00  | 5.00  |
| Sce 4    | 5.00  | 3.00  | 0.20  | 1.00  |
|          | 15.00 | 8.33  | 1.62  | 6.53  |

| Criteria | Sce 1 | Sce 2 | Sce 3 | Sce 4 | Everage<br>(a) | mmult(b) | (a x b) | Lamda | CI   | RI   | CR   |
|----------|-------|-------|-------|-------|----------------|----------|---------|-------|------|------|------|
| Sce 1    | 0.07  | 0.04  | 0.10  | 0.03  | 0.0601         | 0.25     | 4.11    | 4.30  | 0.10 | 0.99 | 0.10 |
| Sce 2    | 0.20  | 0.12  | 0.15  | 0.05  | 0.1314         | 0.53     | 4.06    |       |      |      |      |
| Sce 3    | 0.40  | 0.48  | 0.62  | 0.77  | 0.5660         | 2.66     | 4.71    |       |      |      |      |
| Sce 4    | 0.33  | 0.36  | 0.12  | 0.15  | 0.2425         | 1.05     | 4.33    |       |      |      |      |
|          | 1.00  | 1.00  | 1.00  | 1.00  |                |          |         |       |      |      |      |

S8.6 Scenario assessment based on (C8) Visitor management

| Criteria | Sce 1 | Sce 2 | Sce 3 | Sce 4 | Criteria | Sce 1 | Sce 2 | Sce 3 | Sce 4 | Everage<br>(a) | mmult(b) | (a x b) | Lamda | CI   | RI   | CR   |
|----------|-------|-------|-------|-------|----------|-------|-------|-------|-------|----------------|----------|---------|-------|------|------|------|
| Sce 1    | 1.00  | 0.25  | 0.14  | 0.11  | Sce 1    | 0.05  | 0.06  | 0.02  | 0.05  | 0.0423         | 0.20     | 4.72    | 4.87  | 0.29 | 0.99 | 0.29 |
| Sce 2    | 4.00  | 1.00  | 5.00  | 0.33  | Sce 2    | 0.19  | 0.22  | 0.70  | 0.14  | 0.3129         | 1.78     | 5.69    |       |      |      |      |
| Sce 3    | 7.00  | 0.20  | 1.00  | 1.00  | Sce 3    | 0.33  | 0.04  | 0.14  | 0.41  | 0.2318         | 1.00     | 4.33    |       |      |      |      |
| Sce 4    | 9.00  | 3.00  | 1.00  | 1.00  | Sce 4    | 0.43  | 0.67  | 0.14  | 0.41  | 0.4130         | 1.96     | 4.76    |       |      |      |      |
|          | 21.00 | 4.45  | 7.14  | 2.44  |          | 1.00  | 1.00  | 1.00  | 1.00  |                |          |         |       |      |      |      |

S8.7 Scenario assessment by Transportation Office of Wonosobo Regency (Dishub Wonosobo)

|       | C1     | C2     | C3     | C5     | C8     | Criteria | S8-<br>Scenario |
|-------|--------|--------|--------|--------|--------|----------|-----------------|
| Sce 1 | 0.0569 | 0.0569 | 0.0662 | 0.0601 | 0.0423 | 0.0529   | 0.0563          |
| Sce 2 | 0.1219 | 0.1219 | 0.3557 | 0.1314 | 0.3129 | 0.2815   | 0.20454         |
| Sce 3 | 0.5579 | 0.5579 | 0.1999 | 0.5660 | 0.2318 | 0.1696   | 0.4307          |
| Sce 4 | 0.2633 | 0.2633 | 0.3782 | 0.2425 | 0.4130 | 0.2850   | 0.30846         |
|       |        |        |        |        |        | 0.2110   |                 |

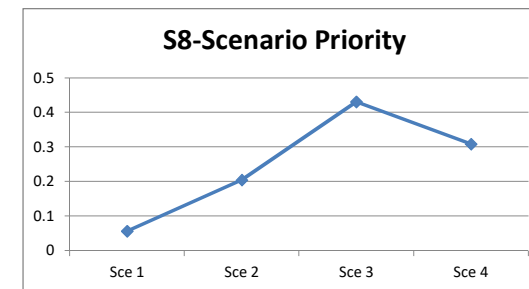

## S9. Tourism and Culture Office of Wonosobo Regency (Dispar Wonosobo)

### S9.1 Criteria assessment by Tourism and Culture Office of Wonosobo Regency (Dispar Wonosobo)

| Criteria | C4    | C1   | C5   | C8   | C10   | C13  |
|----------|-------|------|------|------|-------|------|
| C4       | 1.00  | 0.20 | 0.14 | 0.17 | 0.33  | 0.20 |
| C1       | 6.00  | 1.00 | 5.00 | 0.14 | 3.00  | 3.00 |
| C5       | 4.00  | 0.50 | 1.00 | 0.20 | 3.00  | 3.00 |
| C8       | 7.00  | 3.00 | 3.00 | 1.00 | 3.00  | 1.00 |
| C10      | 2.00  | 0.25 | 0.33 | 0.17 | 1.00  | 1.00 |
| C13      | 3.00  | 0.33 | 0.50 | 0.20 | 2.00  | 1.00 |
|          | 23.00 | 5.28 | 9.98 | 1.88 | 12.33 | 9.20 |

| Criteria | C4   | C1   | C5   | C8   | C10  | C13  | Everage (a) |
|----------|------|------|------|------|------|------|-------------|
| C4       | 0.04 | 0.04 | 0.01 | 0.09 | 0.03 | 0.02 | 0.04        |
| C1       | 0.26 | 0.19 | 0.50 | 0.08 | 0.24 | 0.33 | 0.27        |
| C5       | 0.17 | 0.09 | 0.10 | 0.11 | 0.24 | 0.33 | 0.17        |
| C8       | 0.30 | 0.57 | 0.30 | 0.53 | 0.24 | 0.11 | 0.34        |
| C10      | 0.09 | 0.05 | 0.03 | 0.09 | 0.08 | 0.11 | 0.07        |
| C13      | 0.13 | 0.06 | 0.05 | 0.11 | 0.16 | 0.11 | 0.10        |
|          | 1.00 | 1.00 | 1.00 | 1.00 | 1.00 | 1.00 |             |

| mmult(b) | (a x b) | Lamda | CI    | RI    | CR    |
|----------|---------|-------|-------|-------|-------|
| 0.220    | 5.650   | 6.251 | 0.050 | 1.320 | 0.038 |
| 1.953    | 7.337   |       |       |       |       |
| 1.065    | 6.116   |       |       |       |       |
| 2.263    | 6.597   |       |       |       |       |
| 0.437    | 5.880   |       |       |       |       |
| 0.613    | 5.924   |       |       |       |       |

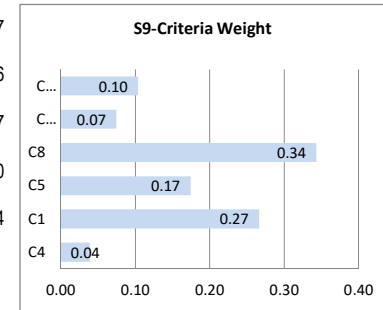

### S9.2 Scenario assessment based on (C4) Various transport System

| Scenario | Sce 1 | Sce 2 | Sce 3 | Sce 4 |
|----------|-------|-------|-------|-------|
| Sce 1    | 1.00  | 0.20  | 0.14  | 0.13  |
| Sce 2    | 5.00  | 1.00  | 0.20  | 0.17  |
| Sce 3    | 7.00  | 5.00  | 1.00  | 0.25  |
| Sce 4    | 8.00  | 6.00  | 4.00  | 1.00  |
|          | 21.00 | 12.20 | 5.34  | 1.54  |

| Scenario | Sce 1 | Sce 2 | Sce 3 | Sce 4 | Everage (a) |
|----------|-------|-------|-------|-------|-------------|
| Sce 1    | 0.05  | 0.02  | 0.03  | 0.08  | 0.0430      |
| Sce 2    | 0.24  | 0.08  | 0.04  | 0.11  | 0.1164      |
| Sce 3    | 0.33  | 0.41  | 0.19  | 0.16  | 0.2731      |
| Sce 4    | 0.38  | 0.49  | 0.75  | 0.65  | 0.5675      |
|          | 1.00  | 1.00  | 1.00  | 1.00  | 1.00        |

| mmult(b) | (a x b) | Lamda | CI    | RI    | CR    |
|----------|---------|-------|-------|-------|-------|
| 0.176    | 4.102   | 4.435 | 0.145 | 0.990 | 0.147 |
| 0.480    | 4.127   |       |       |       |       |
| 1.298    | 4.751   |       |       |       |       |
| 2.702    | 4.761   |       |       |       |       |

### S9.3 Scenario assessment based on (C1) Integration Transport System

| Scenario | Sce 1 | Sce 2 | Sce 3 | Sce 4 |
|----------|-------|-------|-------|-------|
| Sce 1    | 1.00  | 0.14  | 0.13  | 0.11  |
| Sce 2    | 7.00  | 1.00  | 0.25  | 0.13  |
| Sce 3    | 8.00  | 4.00  | 1.00  | 0.33  |
| Sce 4    | 9.00  | 8.00  | 3.00  | 1.00  |
|          | 25.00 | 13.14 | 4.38  | 1.57  |

| Scenario | Sce 1 | Sce 2 | Sce 3 | Sce 4 | Everage (a) |
|----------|-------|-------|-------|-------|-------------|
| Sce 1    | 0.04  | 0.01  | 0.03  | 0.07  | 0.0376      |
| Sce 2    | 0.28  | 0.08  | 0.06  | 0.08  | 0.1232      |
| Sce 3    | 0.32  | 0.30  | 0.23  | 0.21  | 0.2663      |
| Sce 4    | 0.36  | 0.61  | 0.69  | 0.64  | 0.5729      |
|          | 1.00  | 1.00  | 1.00  | 1.00  |             |

| mmult(b) | (a x b) | Lamda | CI    | RI    | CR    |
|----------|---------|-------|-------|-------|-------|
| 0.152    | 4.050   | 4.427 | 0.142 | 0.990 | 0.144 |
| 0.524    | 4.255   |       |       |       |       |
| 1.251    | 4.696   |       |       |       |       |
| 2.696    | 4.705   |       |       |       |       |

#### S9.4 Scenario assessment based on (C5) Comprehensif Planning

| Scenario | Sce 1 | Sce 2 | Sce 3 | Sce 4 |
|----------|-------|-------|-------|-------|
| Sce 1    | 1.00  | 0.33  | 0.14  | 0.11  |
| Sce 2    | 3.00  | 1.00  | 0.25  | 0.17  |
| Sce 3    | 7.00  | 4.00  | 1.00  | 0.33  |
| Sce 4    | 9.00  | 6.00  | 3.00  | 1.00  |
|          | 20.00 | 11.33 | 4.39  | 1.61  |

| Scenario | Sce 1 | Sce 2 | Sce 3 | Sce 4 | Everage<br>(a) | mmult(b) | (a x b) | Lamda | CI    | RI    | CR    |
|----------|-------|-------|-------|-------|----------------|----------|---------|-------|-------|-------|-------|
| Sce 1    | 0.05  | 0.03  | 0.03  | 0.07  | 0.0452         | 0.182    | 4.035   | 4.126 | 0.042 | 0.990 | 0.042 |
| Sce 2    | 0.15  | 0.09  | 0.06  | 0.10  | 0.0996         | 0.402    | 4.030   |       |       |       |       |
| Sce 3    | 0.35  | 0.35  | 0.23  | 0.21  | 0.2844         | 1.190    | 4.184   |       |       |       |       |
| Sce 4    | 0.45  | 0.53  | 0.68  | 0.62  | 0.5708         | 2.429    | 4.255   |       |       |       |       |
|          | 1.00  | 1.00  | 1.00  | 1.00  |                |          |         |       |       |       |       |

#### S9.5 Scenario assessment based on (C8) Visitor management

| Scenario | Sce 1 | Sce 2 | Sce 3 | Sce 4 |
|----------|-------|-------|-------|-------|
| Sce 1    | 1.00  | 0.33  | 0.17  | 0.11  |
| Sce 2    | 3.00  | 1.00  | 0.20  | 0.14  |
| Sce 3    | 6.00  | 5.00  | 1.00  | 0.33  |
| Sce 4    | 9.00  | 7.00  | 3.00  | 1.00  |
|          | 19.00 | 13.33 | 4.37  | 1.59  |

| Scenario | Sce 1 | Sce 2 | Sce 3 | Sce 4 | Everage<br>(a) | mmult(b) | (a x b) | Lamda | CI    | RI    | CR    |
|----------|-------|-------|-------|-------|----------------|----------|---------|-------|-------|-------|-------|
| Sce 1    | 0.05  | 0.03  | 0.04  | 0.07  | 0.0464         | 0.189    | 4.060   | 4.171 | 0.057 | 0.990 | 0.058 |
| Sce 2    | 0.16  | 0.08  | 0.05  | 0.09  | 0.0922         | 0.371    | 4.022   |       |       |       |       |
| Sce 3    | 0.32  | 0.38  | 0.23  | 0.21  | 0.2824         | 1.215    | 4.302   |       |       |       |       |
| Sce 4    | 0.47  | 0.53  | 0.69  | 0.63  | 0.5789         | 2.490    | 4.300   |       |       |       |       |
|          | 1.00  | 1.00  | 1.00  | 1.00  |                |          |         |       |       |       |       |

### S9.6 Scenario assessment based on (C10) Visitors experience

| Scenario | Sce 1 | Sce 2 | Sce 3 | Sce 4 |
|----------|-------|-------|-------|-------|
| Sce 1    | 1.00  | 0.33  | 0.20  | 0.14  |
| Sce 2    | 3.00  | 1.00  | 0.20  | 0.20  |
| Sce 3    | 5.00  | 5.00  | 1.00  | 0.50  |
| Sce 4    | 7.00  | 5.00  | 2.00  | 1.00  |
|          | 16.00 | 11.33 | 3.40  | 1.84  |

### S9.6

| Scenario | Sce 1 | Sce 2 | Sce 3 | Sce 4 | Everage (a) |
|----------|-------|-------|-------|-------|-------------|
| Sce 1    | 0.06  | 0.03  | 0.06  | 0.08  | 0.0571      |
| Sce 2    | 0.19  | 0.09  | 0.06  | 0.11  | 0.1108      |
| Sce 3    | 0.31  | 0.44  | 0.29  | 0.27  | 0.3298      |
| Sce 4    | 0.44  | 0.44  | 0.59  | 0.54  | 0.5024      |
|          | 1.00  | 1.00  | 1.00  | 1.00  |             |

| mmult(b) | (a x b) | Lamda | CI    | RI    | CR    |
|----------|---------|-------|-------|-------|-------|
| 0.232    | 4.061   | 4.156 | 0.052 | 0.990 | 0.053 |
| 0.448    | 4.048   |       |       |       |       |
| 1.420    | 4.306   |       |       |       |       |
| 2.115    | 4.210   |       |       |       |       |

### S9.7 Scenario assessment based on (C13) Suporting Cultural Event

| Scenario | Sce 1 | Sce 2 | Sce 3 | Sce 4 |
|----------|-------|-------|-------|-------|
| Sce 1    | 1.00  | 0.33  | 0.17  | 0.11  |
| Sce 2    | 3.00  | 1.00  | 0.20  | 0.14  |
| Sce 3    | 6.00  | 5.00  | 1.00  | 0.33  |
| Sce 4    | 9.00  | 7.00  | 3.00  | 1.00  |
|          | 19.00 | 13.33 | 4.37  | 1.59  |

| Scenario | Sce 1 | Sce 2 | Sce 3 | Sce 4 | Everage (a) |
|----------|-------|-------|-------|-------|-------------|
| Sce 1    | 0.05  | 0.03  | 0.04  | 0.07  | 0.0464      |
| Sce 2    | 0.16  | 0.08  | 0.05  | 0.09  | 0.0922      |
| Sce 3    | 0.32  | 0.38  | 0.23  | 0.21  | 0.2824      |
| Sce 4    | 0.47  | 0.53  | 0.69  | 0.63  | 0.5789      |
|          | 1.00  | 1.00  | 1.00  | 1.00  |             |

| mmult(b) | (a x b) | Lamda | CI    | RI    | CR    |
|----------|---------|-------|-------|-------|-------|
| 0.189    | 4.060   | 4.171 | 0.057 | 0.990 | 0.058 |
| 0.371    | 4.022   |       |       |       |       |
| 1.215    | 4.302   |       |       |       |       |
| 2.490    | 4.300   |       |       |       |       |

### S9.8 Scenario assessment by Tourism and Culture Office of Wonosobo Regency (Dispar Wonosobo)

|       | C4     | C1     | C5     | C8     | C10    | C13    | Criteria | S9-Scenario Priority |
|-------|--------|--------|--------|--------|--------|--------|----------|----------------------|
| Sce 1 | 0.0430 | 0.0376 | 0.0452 | 0.0464 | 0.0571 | 0.0464 | 0.0389   | 0.04452              |
| Sce 2 | 0.1164 | 0.1232 | 0.0996 | 0.0922 | 0.1108 | 0.0922 | 0.2661   | 0.10406              |
| Sce 3 | 0.2731 | 0.2663 | 0.2844 | 0.2824 | 0.3298 | 0.2824 | 0.1741   | 0.28165              |
| Sce 4 | 0.5675 | 0.5729 | 0.5708 | 0.5789 | 0.5024 | 0.5789 | 0.3430   | 0.56976              |
|       |        |        |        |        |        |        | 0.0744   |                      |
|       |        |        |        |        |        |        | 0.1035   |                      |

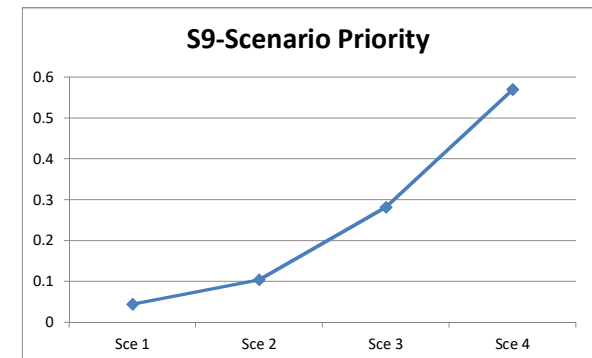



## S10. The Wonosobo Land Transportation Organization (Organda Wonosobo)

### S10.1 Criteria assessment byThe Wonosobo Land Transportation Organization (Organda Wonosobo)

| Criteria | C4    | C1   | C5   | C8   | C11   |
|----------|-------|------|------|------|-------|
| C4       | 1.00  | 0.14 | 0.20 | 0.33 | 0.50  |
| C1       | 7.00  | 1.00 | 3.00 | 5.00 | 6.00  |
| C5       | 5.00  | 0.33 | 1.00 | 3.00 | 4.00  |
| C8       | 3.00  | 0.20 | 0.33 | 1.00 | 3.00  |
| C11      | 2.00  | 0.17 | 0.25 | 0.33 | 1.00  |
|          | 18.00 | 1.84 | 4.78 | 9.67 | 14.50 |

| Criteria | C4   | C1   | C5   | C8   | C11  | Everage (a) |
|----------|------|------|------|------|------|-------------|
| C4       | 0.06 | 0.08 | 0.04 | 0.03 | 0.03 | 0.05        |
| C1       | 0.39 | 0.54 | 0.63 | 0.52 | 0.41 | 0.50        |
| C5       | 0.28 | 0.18 | 0.21 | 0.31 | 0.28 | 0.25        |
| C8       | 0.17 | 0.11 | 0.07 | 0.10 | 0.21 | 0.13        |
| C11      | 0.11 | 0.09 | 0.05 | 0.03 | 0.07 | 0.07        |
|          | 1.00 | 1.00 | 1.00 | 1.00 | 1.00 | 1.00        |

| mmult(b) | (a x b) | Lamda | CI    | RI    | CR    |
|----------|---------|-------|-------|-------|-------|
| 0.249    | 5.115   | 5.199 | 0.050 | 1.188 | 0.042 |
| 2.676    | 5.373   |       |       |       |       |
| 1.340    | 5.341   |       |       |       |       |
| 0.675    | 5.150   |       |       |       |       |
| 0.358    | 5.015   |       |       |       |       |

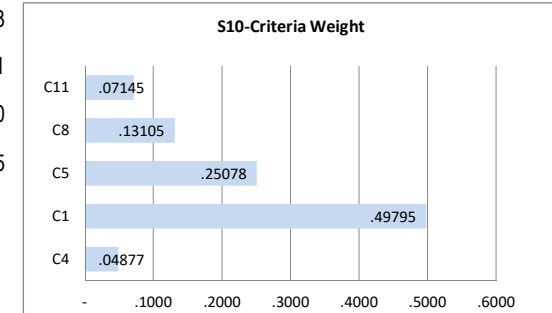

### S10.2 Scenario assessment based on (C4) Various transport System

| Scenario | Sce 1 | Sce 2 | Sce 3 | Sce 4 |
|----------|-------|-------|-------|-------|
| Sce 1    | 1.00  | 0.33  | 0.25  | 0.17  |
| Sce 2    | 3.00  | 1.00  | 0.33  | 0.25  |
| Sce 3    | 4.00  | 3.00  | 1.00  | 0.33  |
| Sce 4    | 6.00  | 4.00  | 3.00  | 1.00  |
|          | 14.00 | 8.33  | 4.58  | 1.75  |

| Scenario | Sce 1 | Sce 2 | Sce 3 | Sce 4 | Everage (a) |
|----------|-------|-------|-------|-------|-------------|
| Sce 1    | 0.07  | 0.04  | 0.05  | 0.10  | 6.5%        |
| Sce 2    | 0.21  | 0.12  | 0.07  | 0.14  | 13.7%       |
| Sce 3    | 0.29  | 0.36  | 0.22  | 0.19  | 26.4%       |
| Sce 4    | 0.43  | 0.48  | 0.65  | 0.57  | 53.4%       |
|          | 1.00  | 1.00  | 1.00  | 1.00  |             |

| mmult(b) | (a x b) | Lamda | CI    | RI    | CR    |
|----------|---------|-------|-------|-------|-------|
| 0.266    | 4.073   | 4.146 | 0.049 | 0.990 | 0.049 |
| 0.555    | 4.035   |       |       |       |       |
| 1.115    | 4.230   |       |       |       |       |
| 2.266    | 4.247   |       |       |       |       |

### S10.3 Scenario assessment based on (C1) Integration Transport System

|       | Sce 1 | Sce 2 | Sce 3 | Sce 4 |
|-------|-------|-------|-------|-------|
| Sce 1 | 1.00  | 0.33  | 0.20  | 0.14  |
| Sce 2 | 3.00  | 1.00  | 0.25  | 0.20  |
| Sce 3 | 5.00  | 4.00  | 1.00  | 0.33  |
| Sce 4 | 7.00  | 5.00  | 3.00  | 1.00  |
|       | 16.00 | 10.33 | 4.45  | 1.68  |

| Scenario | Sce 1 | Sce 2 | Sce 3 | Sce 4 | Everage (a) |
|----------|-------|-------|-------|-------|-------------|
| Sce 1    | 0.06  | 0.03  | 0.04  | 0.09  | 0.0562      |
| Sce 2    | 0.19  | 0.10  | 0.06  | 0.12  | 0.1149      |
| Sce 3    | 0.31  | 0.39  | 0.22  | 0.20  | 0.2808      |
| Sce 4    | 0.44  | 0.48  | 0.67  | 0.60  | 0.5480      |
|          | 1.00  | 1.00  | 1.00  | 1.00  |             |

| mmult(b) | (a x b) | Lamda | CI    | RI    | CR    |
|----------|---------|-------|-------|-------|-------|
| 0.229    | 4.072   | 4.174 | 0.058 | 0.990 | 0.059 |
| 0.463    | 4.032   |       |       |       |       |
| 1.204    | 4.289   |       |       |       |       |
| 2.359    | 4.304   |       |       |       |       |

S10.4 Scenario assessment based on (C5) Comprehensif Planning

|       | Sce 1 | Sce 2 | Sce 3 | Sce 4 | Scenario | Sce 1 | Sce 2 | Sce 3 | Sce 4 | Everage<br>(a) | mmult(b) | (a x b) | Lamda | CI    | RI    | CR    |
|-------|-------|-------|-------|-------|----------|-------|-------|-------|-------|----------------|----------|---------|-------|-------|-------|-------|
| Sce 1 | 1.00  | 0.33  | 0.20  | 0.14  | Sce 1    | 0.06  | 0.05  | 0.04  | 0.08  | 0.0583         | 0.234    | 4.019   | 4.068 | 0.023 | 0.990 | 0.023 |
| Sce 2 | 3.00  | 1.00  | 0.50  | 0.25  | Sce 2    | 0.19  | 0.14  | 0.11  | 0.14  | 0.1438         | 0.580    | 4.035   |       |       |       |       |
| Sce 3 | 5.00  | 2.00  | 1.00  | 0.33  | Sce 3    | 0.31  | 0.27  | 0.21  | 0.19  | 0.2478         | 1.010    | 4.077   |       |       |       |       |
| Sce 4 | 7.00  | 4.00  | 3.00  | 1.00  | Sce 4    | 0.44  | 0.55  | 0.64  | 0.58  | 0.5501         | 2.277    | 4.138   |       |       |       |       |
|       | 16.00 | 7.33  | 4.70  | 1.73  |          | 1.00  | 1.00  | 1.00  | 1.00  |                |          |         |       |       |       |       |

S10.5 Scenario assessment based on (C8) Visitor management

|       | Sce 1 | Sce 2 | Sce 3 | Sce 4 | Scenario | Sce 1 | Sce 2 | Sce 3 | Sce 4 | Everage<br>(a) | mmult(b) | (a x b) | Lamda | CI    | RI    | CR    |
|-------|-------|-------|-------|-------|----------|-------|-------|-------|-------|----------------|----------|---------|-------|-------|-------|-------|
| Sce 1 | 1.00  | 0.33  | 0.33  | 0.14  | Sce 1    | 0.07  | 0.04  | 0.07  | 0.08  | 0.0664         | 0.273    | 4.107   | 4.143 | 0.048 | 0.990 | 0.048 |
| Sce 2 | 3.00  | 1.00  | 0.33  | 0.25  | Sce 2    | 0.21  | 0.12  | 0.07  | 0.14  | 0.1376         | 0.556    | 4.042   |       |       |       |       |
| Sce 3 | 3.00  | 3.00  | 1.00  | 0.33  | Sce 3    | 0.21  | 0.36  | 0.21  | 0.19  | 0.2454         | 1.041    | 4.242   |       |       |       |       |
| Sce 4 | 7.00  | 4.00  | 3.00  | 1.00  | Sce 4    | 0.50  | 0.48  | 0.64  | 0.58  | 0.5505         | 2.302    | 4.182   |       |       |       |       |
|       | 14.00 | 8.33  | 4.67  | 1.73  |          | 1.00  | 1.00  | 1.00  | 1.00  |                |          |         |       |       |       |       |

S10.6 Scenario assessment based on (C11) Efisiensi Operasional

|       | Sce 1 | Sce 2 | Sce 3 | Sce 4 | Scenario | Sce 1 | Sce 2 | Sce 3 | Sce 4 | Everage (a) | mmult(b) | (a x b) | Lamda | CI    | RI    | CR    |
|-------|-------|-------|-------|-------|----------|-------|-------|-------|-------|-------------|----------|---------|-------|-------|-------|-------|
| Sce 1 | 1.00  | 0.33  | 0.17  | 0.20  | Sce 1    | 0.07  | 0.04  | 0.10  | 0.04  | 0.0615      | 0.249    | 4.056   | 4.148 | 0.049 | 0.990 | 0.050 |
| Sce 2 | 3.00  | 1.00  | 0.25  | 0.33  | Sce 2    | 0.20  | 0.12  | 0.14  | 0.07  | 0.1341      | 0.543    | 4.047   |       |       |       |       |
| Sce 3 | 6.00  | 4.00  | 1.00  | 3.00  | Sce 3    | 0.40  | 0.48  | 0.57  | 0.66  | 0.5283      | 2.262    | 4.282   |       |       |       |       |
| Sce 4 | 5.00  | 3.00  | 0.33  | 1.00  | Sce 4    | 0.33  | 0.36  | 0.19  | 0.22  | 0.2761      | 1.162    | 4.209   |       |       |       |       |
|       | 15.00 | 8.33  | 1.75  | 4.53  |          | 1.00  | 1.00  | 1.00  | 1.00  |             |          |         |       |       |       |       |

S10.7 Scenario assessment by The Wonosobo Land Transportation Organization (Organda Wonosobo)

|       | C4     | C1     | C5     | C8     | C11    | Kriteria | S10-Scenario |
|-------|--------|--------|--------|--------|--------|----------|--------------|
| Sce 1 | 0.0653 | 0.0562 | 0.0583 | 0.0664 | 0.0615 | 0.0488   | 0.059        |
| Sce 2 | 0.1375 | 0.1149 | 0.1438 | 0.1376 | 0.1341 | 0.4979   | 0.128        |
| Sce 3 | 0.2636 | 0.2808 | 0.2478 | 0.2454 | 0.5283 | 0.2508   | 0.285        |
| Sce 4 | 0.5336 | 0.5480 | 0.5501 | 0.5505 | 0.2761 | 0.1310   | 0.529        |
|       |        |        |        |        |        | 0.0715   |              |

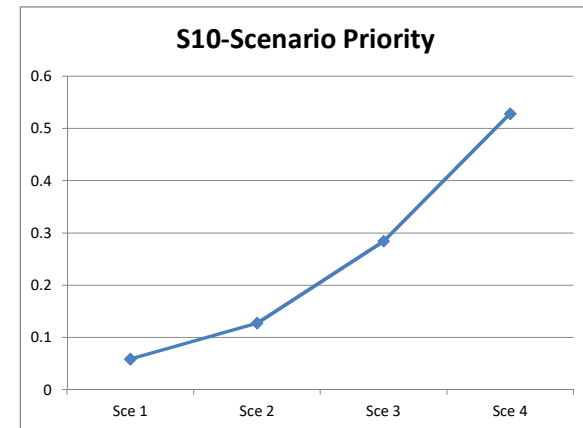

## S11. Research and Development Planning Agency of Banjarnegara Regency (Baperlitbang Banjarnegara)

### S11.1 Criteria assessment by Research and Development Planning Agency of Banjarnegara Regency (Baperlitbang Banjarnegara)

| Criteria | C1   | C2   | C3    | C5   | C8    |
|----------|------|------|-------|------|-------|
| C1       | 1.00 | 0.33 | 3.00  | 0.20 | 5.00  |
| C2       | 3.00 | 1.00 | 5.00  | 0.33 | 6.00  |
| C3       | 0.33 | 0.20 | 1.00  | 0.17 | 3.00  |
| C5       | 5.00 | 3.00 | 6.00  | 1.00 | 7.00  |
| C8       | 0.20 | 0.17 | 0.33  | 0.14 | 1.00  |
|          | 9.53 | 4.70 | 15.33 | 1.84 | 22.00 |

| Criteria | C1   | C2   | C3   | C5   | C8   | Everage (a) |
|----------|------|------|------|------|------|-------------|
| C1       | 0.10 | 0.07 | 0.20 | 0.11 | 0.23 | 14.15%      |
| C2       | 0.31 | 0.21 | 0.33 | 0.18 | 0.27 | 26.14%      |
| C3       | 0.03 | 0.04 | 0.07 | 0.09 | 0.14 | 7.39%       |
| C5       | 0.52 | 0.64 | 0.39 | 0.54 | 0.32 | 48.30%      |
| C8       | 0.02 | 0.04 | 0.02 | 0.08 | 0.05 | 4.02%       |
|          | 1.00 | 1.00 | 1.00 | 1.00 | 1.00 |             |

| mmult(b) | (a x b) | Lamda | CI    | RI    | CR    |
|----------|---------|-------|-------|-------|-------|
| 0.748    | 5.288   | 5.327 | 0.082 | 1.188 | 0.069 |
| 1.458    | 5.576   |       |       |       |       |
| 0.375    | 5.068   |       |       |       |       |
| 2.700    | 5.589   |       |       |       |       |
| 0.206    | 5.114   |       |       |       |       |

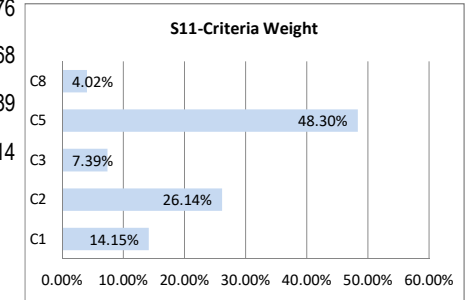

### S11.2 Scenario assessment based on (C1) Integration Transport System

|       | Sce 1 | Sce 2 | Sce 3 | Sce 4 |
|-------|-------|-------|-------|-------|
| Sce 1 | 1.00  | 0.33  | 0.14  | 0.20  |
| Sce 2 | 3.00  | 1.00  | 0.33  | 0.33  |
| Sce 3 | 7.00  | 3.00  | 1.00  | 3.00  |
| Sce 4 | 5.00  | 3.00  | 0.33  | 1.00  |
|       | 16.00 | 7.33  | 1.81  | 4.53  |

|       | Sce 1 | Sce 2 | Sce 3 | Sce 4 | Everage (a) |
|-------|-------|-------|-------|-------|-------------|
| Sce 1 | 0.06  | 0.05  | 0.08  | 0.04  | 6%          |
| Sce 2 | 0.19  | 0.14  | 0.18  | 0.07  | 15%         |
| Sce 3 | 0.44  | 0.41  | 0.55  | 0.66  | 52%         |
| Sce 4 | 0.31  | 0.41  | 0.18  | 0.22  | 28%         |
|       | 1.00  | 1.00  | 1.00  | 1.00  |             |

| mmult(b) | (a x b) | Lamda | CI    | RI    | CR    |
|----------|---------|-------|-------|-------|-------|
| 0.236    | 4.089   | 4.141 | 0.047 | 0.990 | 0.047 |
| 0.584    | 4.018   |       |       |       |       |
| 2.201    | 4.271   |       |       |       |       |
| 1.178    | 4.184   |       |       |       |       |

### S11.3 Scenario assessment based on (C2) Safety and security

|       | Sce 1 | Sce 2 | Sce 3 | Sce 4 |
|-------|-------|-------|-------|-------|
| Sce 1 | 1.00  | 0.33  | 0.20  | 0.17  |
| Sce 2 | 3.00  | 1.00  | 0.33  | 0.20  |
| Sce 3 | 5.00  | 3.00  | 1.00  | 0.33  |
| Sce 4 | 6.00  | 5.00  | 3.00  | 1.00  |
|       | 15.00 | 9.33  | 4.53  | 1.70  |

|       | Sce 1 | Sce 2 | Sce 3 | Sce 4 | Everage (a) |
|-------|-------|-------|-------|-------|-------------|
| Sce 1 | 0.07  | 0.04  | 0.04  | 0.10  | 6%          |
| Sce 2 | 0.20  | 0.11  | 0.07  | 0.12  | 12%         |
| Sce 3 | 0.33  | 0.32  | 0.22  | 0.20  | 27%         |
| Sce 4 | 0.40  | 0.54  | 0.66  | 0.59  | 55%         |
|       | 1.00  | 1.00  | 1.00  | 1.00  |             |

| mmult(b) | (a x b) | Lamda | CI    | RI    | CR    |
|----------|---------|-------|-------|-------|-------|
| 0.247    | 4.045   | 4.152 | 0.051 | 0.990 | 0.051 |
| 0.507    | 4.066   |       |       |       |       |
| 1.129    | 4.216   |       |       |       |       |
| 2.340    | 4.282   |       |       |       |       |

S11.4 Scenario assessment based on (C3) Accesibility

|       | Sce 1 | Sce 2 | Sce 3 | Sce 4 |
|-------|-------|-------|-------|-------|
| Sce 1 | 1.00  | 0.20  | 0.17  | 0.33  |
| Sce 2 | 5.00  | 1.00  | 0.33  | 3.00  |
| Sce 3 | 6.00  | 3.00  | 1.00  | 5.00  |
| Sce 4 | 3.00  | 0.33  | 0.20  | 1.00  |
|       | 15.00 | 4.53  | 1.70  | 9.33  |

|       | Sce 1 | Sce 2 | Sce 3 | Sce 4 | Everage<br>(a) |
|-------|-------|-------|-------|-------|----------------|
| Sce 1 | 0.07  | 0.04  | 0.10  | 0.04  | 6%             |
| Sce 2 | 0.33  | 0.22  | 0.20  | 0.32  | 27%            |
| Sce 3 | 0.40  | 0.66  | 0.59  | 0.54  | 55%            |
| Sce 4 | 0.20  | 0.07  | 0.12  | 0.11  | 12%            |
|       | 1.00  | 1.00  | 1.00  | 1.00  |                |

| mmult(b) | (a x b) | Lamda | CI    | RI    | CR    |
|----------|---------|-------|-------|-------|-------|
| 0.247    | 4.045   | 4.152 | 0.051 | 0.990 | 0.051 |
| 1.129    | 4.216   |       |       |       |       |
| 2.340    | 4.282   |       |       |       |       |
| 0.507    | 4.066   |       |       |       |       |

S11.5 Scenario assessment based on (C5) Comprehensif Planning

|       | Sce 1 | Sce 2 | Sce 3 | Sce 4 |
|-------|-------|-------|-------|-------|
| Sce 1 | 1.00  | 0.33  | 0.14  | 0.20  |
| Sce 2 | 3.00  | 1.00  | 0.33  | 0.33  |
| Sce 3 | 7.00  | 3.00  | 1.00  | 3.00  |
| Sce 4 | 5.00  | 3.00  | 0.33  | 1.00  |
|       | 16.00 | 7.33  | 1.81  | 4.53  |

|       | Sce 1 | Sce 2 | Sce 3 | Sce 4 | Everage<br>(a) |
|-------|-------|-------|-------|-------|----------------|
| Sce 1 | 0.06  | 0.05  | 0.08  | 0.04  | 6%             |
| Sce 2 | 0.19  | 0.14  | 0.18  | 0.07  | 15%            |
| Sce 3 | 0.44  | 0.41  | 0.55  | 0.66  | 52%            |
| Sce 4 | 0.31  | 0.41  | 0.18  | 0.22  | 28%            |
|       | 1.00  | 1.00  | 1.00  | 1.00  |                |

| mmult(b) | (a x b) | Lamda | CI    | RI    | CR    |
|----------|---------|-------|-------|-------|-------|
| 0.236    | 4.089   | 4.141 | 0.047 | 0.990 | 0.047 |
| 0.584    | 4.018   |       |       |       |       |
| 2.201    | 4.271   |       |       |       |       |
| 1.178    | 4.184   |       |       |       |       |

S11.6 Scenario assessment based on (C8) Visitor management

|       | Sce 1 | Sce 2 | Sce 3 | Sce 4 |
|-------|-------|-------|-------|-------|
| Sce 1 | 1.00  | 0.33  | 0.20  | 0.14  |
| Sce 2 | 3.00  | 1.00  | 0.33  | 0.20  |
| Sce 3 | 5.00  | 3.00  | 1.00  | 0.33  |
| Sce 4 | 7.00  | 5.00  | 3.00  | 1.00  |
|       | 16.00 | 9.33  | 4.53  | 1.68  |

|       | Sce 1 | Sce 2 | Sce 3 | Sce 4 | Everage (a) |
|-------|-------|-------|-------|-------|-------------|
| Sce 1 | 0.06  | 0.04  | 0.04  | 0.09  | 6%          |
| Sce 2 | 0.19  | 0.11  | 0.07  | 0.12  | 12%         |
| Sce 3 | 0.31  | 0.32  | 0.22  | 0.20  | 26%         |
| Sce 4 | 0.44  | 0.54  | 0.66  | 0.60  | 56%         |
|       | 1.00  | 1.00  | 1.00  | 1.00  |             |

| mmult(b) | (a x b) | Lamda | CI    | RI    | CR    |
|----------|---------|-------|-------|-------|-------|
| 0.230    | 4.041   | 4.118 | 0.039 | 0.990 | 0.040 |
| 0.492    | 4.036   |       |       |       |       |
| 1.099    | 4.175   |       |       |       |       |
| 2.356    | 4.222   |       |       |       |       |

S11.7 Scenario assessment by Research and Development Planning Agency of Banjarnegara Regency (Baperlitbang Banjarnegara)

|       | C1     | C2     | C3     | C5     | C8     | CRITERIA | S11-Scenario |
|-------|--------|--------|--------|--------|--------|----------|--------------|
| Sce 1 | 0.0578 | 0.0611 | 0.0611 | 0.0578 | 0.0569 | 14.1%    | 5.89%        |
| Sce 2 | 0.1454 | 0.1246 | 0.2679 | 0.1454 | 0.1219 | 26.1%    | 14.81%       |
| Sce 3 | 0.5152 | 0.2679 | 0.5464 | 0.5152 | 0.2633 | 7.4%     | 44.27%       |
| Sce 4 | 0.2816 | 0.5464 | 0.1246 | 0.2816 | 0.5579 | 48.3%    | 35.03%       |
|       |        |        |        |        |        | 4.0%     |              |

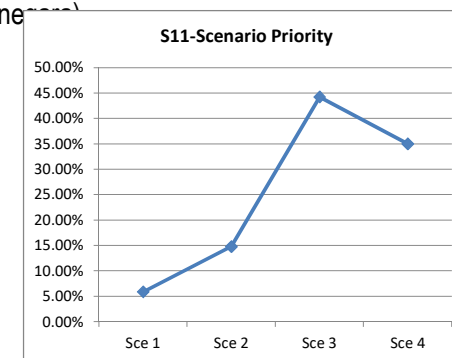

## S12. Transportation Office of Banjarnegara Regency (Dishub Banjarnegara)

### S12.1 Criteria assessment by Transportation Office of Banjarnegara Regency (Dishub Banjarnegara)

| Criteria | C1    | C2   | C3   | C5   | C8    |
|----------|-------|------|------|------|-------|
| C1       | 1.00  | 0.20 | 0.33 | 0.17 | 3.00  |
| C2       | 5.00  | 1.00 | 3.00 | 0.33 | 6.00  |
| C3       | 3.00  | 0.33 | 1.00 | 0.20 | 5.00  |
| C5       | 6.00  | 3.00 | 5.00 | 1.00 | 7.00  |
| C8       | 0.33  | 0.17 | 0.20 | 0.14 | 1.00  |
|          | 15.33 | 4.70 | 9.53 | 1.84 | 22.00 |

| Criteria | C1   | C2   | C3   | C5   | C8   | Everage (a) |
|----------|------|------|------|------|------|-------------|
| C1       | 0.07 | 0.04 | 0.03 | 0.09 | 0.14 | 7.39%       |
| C2       | 0.33 | 0.21 | 0.31 | 0.18 | 0.27 | 26.14%      |
| C3       | 0.20 | 0.07 | 0.10 | 0.11 | 0.23 | 14.15%      |
| C5       | 0.39 | 0.64 | 0.52 | 0.54 | 0.32 | 48.30%      |
| C8       | 0.02 | 0.04 | 0.02 | 0.08 | 0.05 | 4.02%       |
|          | 1.00 | 1.00 | 1.00 | 1.00 | 1.00 |             |

| mmult(b) | (a x b) | Lamda | CI    | RI    | CR    |
|----------|---------|-------|-------|-------|-------|
| 0.375    | 5.068   | 5.327 | 0.082 | 1.188 | 0.069 |
| 1.458    | 5.576   |       |       |       |       |
| 0.748    | 5.288   |       |       |       |       |
| 2.700    | 5.589   |       |       |       |       |
| 0.206    | 5.114   |       |       |       |       |

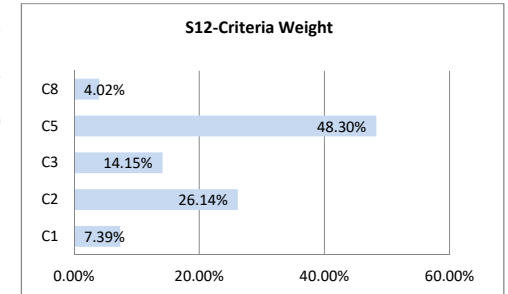

### S12.2 Scenario assessment based on (C1) Integration Transport System

|       | Sce 1 | Sce 2 | Sce 3 | Sce 4 |
|-------|-------|-------|-------|-------|
| Sce 1 | 1.00  | 0.20  | 0.14  | 0.33  |
| Sce 2 | 5.00  | 1.00  | 0.33  | 3.00  |
| Sce 3 | 7.00  | 3.00  | 1.00  | 5.00  |
| Sce 4 | 3.00  | 0.33  | 0.20  | 1.00  |
|       | 16.00 | 4.53  | 1.68  | 9.33  |

|       | Sce 1 | Sce 2 | Sce 3 | Sce 4 | Everage (a) |
|-------|-------|-------|-------|-------|-------------|
| Sce 1 | 0.06  | 0.04  | 0.09  | 0.04  | 0.0569      |
| Sce 2 | 0.31  | 0.22  | 0.20  | 0.32  | 0.2633      |
| Sce 3 | 0.44  | 0.66  | 0.60  | 0.54  | 0.5579      |
| Sce 4 | 0.19  | 0.07  | 0.12  | 0.11  | 0.1219      |
|       | 1.00  | 1.00  | 1.00  | 1.00  |             |

| mmult(b) | (a x b) | Lamda | CI    | RI    | CR    |
|----------|---------|-------|-------|-------|-------|
| 0.230    | 4.041   | 4.118 | 0.039 | 0.990 | 0.040 |
| 1.099    | 4.175   |       |       |       |       |
| 2.356    | 4.222   |       |       |       |       |
| 0.492    | 4.036   |       |       |       |       |

### S12.3 Scenario assessment based on (C2) Safety and security

|       | Sce 1 | Sce 2 | Sce 3 | Sce 4 |
|-------|-------|-------|-------|-------|
| Sce 1 | 1.00  | 0.33  | 0.20  | 0.14  |
| Sce 2 | 3.00  | 1.00  | 0.33  | 0.20  |
| Sce 3 | 5.00  | 3.00  | 1.00  | 0.33  |
| Sce 4 | 7.00  | 5.00  | 3.00  | 1.00  |
|       | 16.00 | 9.33  | 4.53  | 1.68  |

|       | Sce 1 | Sce 2 | Sce 3 | Sce 4 | Everage (a) |
|-------|-------|-------|-------|-------|-------------|
| Sce 1 | 0.06  | 0.04  | 0.04  | 0.09  | 0.0569      |
| Sce 2 | 0.19  | 0.11  | 0.07  | 0.12  | 0.1219      |
| Sce 3 | 0.31  | 0.32  | 0.22  | 0.20  | 0.2633      |
| Sce 4 | 0.44  | 0.54  | 0.66  | 0.60  | 0.5579      |
|       | 1.00  | 1.00  | 1.00  | 1.00  |             |

| mmult(b) | (a x b) | Lamda | CI    | RI    | CR    |
|----------|---------|-------|-------|-------|-------|
| 0.230    | 4.041   | 4.118 | 0.039 | 0.990 | 0.040 |
| 0.492    | 4.036   |       |       |       |       |
| 1.099    | 4.175   |       |       |       |       |
| 2.356    | 4.222   |       |       |       |       |

S12.4 Scenario assessment based on (C3) Accesibility

|       | Sce 1 | Sce 2 | Sce 3 | Sce 4 |
|-------|-------|-------|-------|-------|
| Sce 1 | 1.00  | 0.33  | 0.14  | 0.20  |
| Sce 2 | 3.00  | 1.00  | 0.33  | 0.33  |
| Sce 3 | 7.00  | 3.00  | 1.00  | 3.00  |
| Sce 4 | 5.00  | 3.00  | 0.33  | 1.00  |
|       | 16.00 | 7.33  | 1.81  | 4.53  |

|       | Sce 1 | Sce 2 | Sce 3 | Sce 4 | Everage<br>(a) | mmult(b) | (a x b) | Lamda | CI    | RI    | CR    |
|-------|-------|-------|-------|-------|----------------|----------|---------|-------|-------|-------|-------|
| Sce 1 | 0.06  | 0.05  | 0.08  | 0.04  | 0.0578         | 0.236    | 4.089   | 4.141 | 0.047 | 0.990 | 0.047 |
| Sce 2 | 0.19  | 0.14  | 0.18  | 0.07  | 0.1454         | 0.584    | 4.018   |       |       |       |       |
| Sce 3 | 0.44  | 0.41  | 0.55  | 0.66  | 0.5152         | 2.201    | 4.271   |       |       |       |       |
| Sce 4 | 0.31  | 0.41  | 0.18  | 0.22  | 0.2816         | 1.178    | 4.184   |       |       |       |       |
|       | 1.00  | 1.00  | 1.00  | 1.00  |                |          |         |       |       |       |       |

S12.5 Scenario assessment based on (C5) Comprehensif Planning

|       | Sce 1 | Sce 2 | Sce 3 | Sce 4 |
|-------|-------|-------|-------|-------|
| Sce 1 | 1.00  | 0.33  | 0.20  | 0.14  |
| Sce 2 | 3.00  | 1.00  | 0.33  | 0.20  |
| Sce 3 | 5.00  | 3.00  | 1.00  | 0.33  |
| Sce 4 | 7.00  | 5.00  | 3.00  | 1.00  |
|       | 16.00 | 9.33  | 4.53  | 1.68  |

|       | Sce 1 | Sce 2 | Sce 3 | Sce 4 | Everage<br>(a) | mmult(b) | (a x b) | Lamda | CI    | RI    | CR    |
|-------|-------|-------|-------|-------|----------------|----------|---------|-------|-------|-------|-------|
| Sce 1 | 0.06  | 0.04  | 0.04  | 0.09  | 0.0569         | 0.230    | 4.041   | 4.118 | 0.039 | 0.990 | 0.040 |
| Sce 2 | 0.19  | 0.11  | 0.07  | 0.12  | 0.1219         | 0.492    | 4.036   |       |       |       |       |
| Sce 3 | 0.31  | 0.32  | 0.22  | 0.20  | 0.2633         | 1.099    | 4.175   |       |       |       |       |
| Sce 4 | 0.44  | 0.54  | 0.66  | 0.60  | 0.5579         | 2.356    | 4.222   |       |       |       |       |
|       | 1.00  | 1.00  | 1.00  | 1.00  |                |          |         |       |       |       |       |



S12.6 Scenario assessment based on (C8) Visitor management

|       | Sce 1 | Sce 2 | Sce 3 | Sce 4 |  | Sce 1 | Sce 2 | Sce 3 | Sce 4 | Everage<br>(a) | mmult(b) | (a x b) | Lamda | CI    | RI    | CR    |
|-------|-------|-------|-------|-------|--|-------|-------|-------|-------|----------------|----------|---------|-------|-------|-------|-------|
| Sce 1 | 1.00  | 0.33  | 0.20  | 0.17  |  | Sce 1 | 0.07  | 0.04  | 0.06  | 0.0626         | 0.252    | 4.025   | 4.080 | 0.027 | 0.990 | 0.027 |
| Sce 2 | 3.00  | 1.00  | 0.33  | 0.25  |  | Sce 2 | 0.20  | 0.12  | 0.09  | 0.1362         | 0.550    | 4.038   |       |       |       |       |
| Sce 3 | 5.00  | 3.00  | 1.00  | 0.50  |  | Sce 3 | 0.33  | 0.36  | 0.28  | 0.3093         | 1.277    | 4.127   |       |       |       |       |
| Sce 4 | 6.00  | 4.00  | 2.00  | 1.00  |  | Sce 4 | 0.40  | 0.48  | 0.57  | 0.4919         | 2.031    | 4.128   |       |       |       |       |
|       | 15.00 | 8.33  | 3.53  | 1.92  |  |       | 1.00  | 1.00  | 1.00  | 1.00           |          |         |       |       |       |       |

S12.7 Scenario assessment by Transportation Office of Banjarnegara Regency (Dishub Banjarnegara)

|       | C1     | C2     | C3     | C5     | C8     | Kriteria | S12-<br>Scenario |
|-------|--------|--------|--------|--------|--------|----------|------------------|
| Sce 1 | 0.0569 | 0.0569 | 0.0578 | 0.0569 | 0.0626 | 0.0739   | 5.72%            |
| Sce 2 | 0.2633 | 0.1219 | 0.1454 | 0.1219 | 0.1362 | 0.2614   | 13.6%            |
| Sce 3 | 0.5579 | 0.2633 | 0.5152 | 0.2633 | 0.3093 | 0.1415   | 32.3%            |
| Sce 4 | 12%    | 56%    | 28%    | 56%    | 49%    | 0.4830   | 48.4%            |
|       |        |        |        |        |        | 0.0402   |                  |

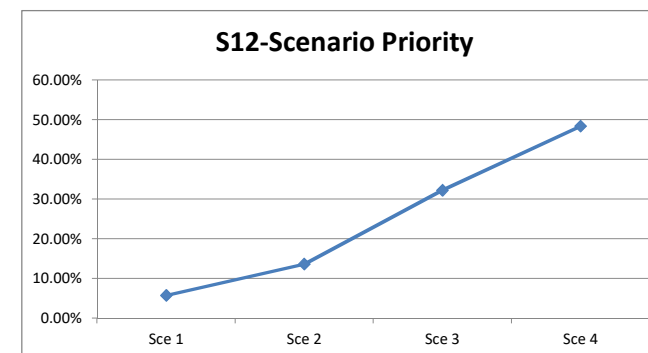

### S13. Tourism and Culture Office of Banjarnegara Regency (Dispar Banjarnegara)

#### S13.1 Criteria assessment Tourism and Culture Office of Banjarnegara Regency (Dispar Banjarnegara)

|     | C4    | C1    | C5   | C8   | C13  |
|-----|-------|-------|------|------|------|
| C4  | 1.00  | 0.33  | 0.14 | 0.17 | 0.25 |
| C1  | 3.00  | 1.00  | 0.20 | 0.25 | 0.33 |
| C5  | 7.00  | 5.00  | 1.00 | 3.00 | 4.00 |
| C8  | 6.00  | 4.00  | 0.33 | 1.00 | 3.00 |
| C13 | 4.00  | 3.00  | 0.25 | 0.33 | 1.00 |
|     | 21.00 | 13.33 | 1.93 | 4.75 | 8.58 |

|     | C4   | C1   | C5   | C8   | C13  | Everage (a) |
|-----|------|------|------|------|------|-------------|
| C4  | 0.05 | 0.03 | 0.07 | 0.04 | 0.03 | 0.04        |
| C1  | 0.14 | 0.08 | 0.10 | 0.05 | 0.04 | 0.08        |
| C5  | 0.33 | 0.38 | 0.52 | 0.63 | 0.47 | 0.47        |
| C8  | 0.29 | 0.30 | 0.17 | 0.21 | 0.35 | 0.26        |
| C13 | 0.19 | 0.23 | 0.13 | 0.07 | 0.12 | 0.15        |
|     | 1.00 | 1.00 | 1.00 | 1.00 | 1.00 | 1.00        |

| mmult(b) | (a x b) | Lamda | CI    | RI    | CR    |
|----------|---------|-------|-------|-------|-------|
| 0.217    | 5.136   | 5.275 | 0.069 | 1.188 | 0.058 |
| 0.417    | 5.046   |       |       |       |       |
| 2.550    | 5.485   |       |       |       |       |
| 1.442    | 5.466   |       |       |       |       |
| 0.767    | 5.241   |       |       |       |       |

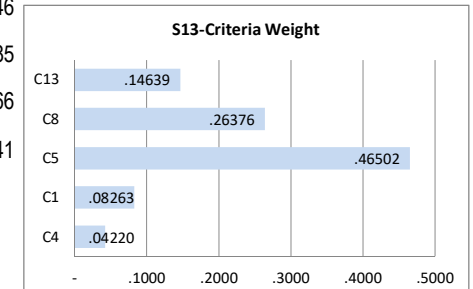

#### S13.2 Scenario assessment based on (C4) Various transport System

|       | Sce 1 | Sce 2 | Sce 3 | Sce 4 |
|-------|-------|-------|-------|-------|
| Sce 1 | 1.00  | 0.25  | 0.14  | 0.33  |
| Sce 2 | 4.00  | 1.00  | 0.33  | 3.00  |
| Sce 3 | 7.00  | 3.00  | 1.00  | 5.00  |
| Sce 4 | 3.00  | 0.33  | 0.20  | 1.00  |
|       | 15.00 | 4.58  | 1.68  | 9.33  |

|       | Sce 1 | Sce 2 | Sce 3 | Sce 4 | Everage (a) |
|-------|-------|-------|-------|-------|-------------|
| Sce 1 | 0.07  | 0.05  | 0.09  | 0.04  | 0.0605      |
| Sce 2 | 0.27  | 0.22  | 0.20  | 0.32  | 0.2513      |
| Sce 3 | 0.47  | 0.65  | 0.60  | 0.54  | 0.5634      |
| Sce 4 | 0.20  | 0.07  | 0.12  | 0.11  | 0.1248      |
|       | 1.00  | 1.00  | 1.00  | 1.00  |             |

| mmult(b) | (a x b) | Lamda | CI    | RI    | CR    |
|----------|---------|-------|-------|-------|-------|
| 0.245    | 4.054   | 4.121 | 0.040 | 0.990 | 0.041 |
| 1.056    | 4.201   |       |       |       |       |
| 2.365    | 4.198   |       |       |       |       |
| 0.503    | 4.029   |       |       |       |       |

#### S13.3 Scenario assessment based on (C1) Integration Transport System

|       | Sce 1 | Sce 2 | Sce 3 | Sce 4 |
|-------|-------|-------|-------|-------|
| Sce 1 | 1.00  | 0.20  | 0.14  | 0.33  |
| Sce 2 | 5.00  | 1.00  | 0.33  | 3.00  |
| Sce 3 | 7.00  | 3.00  | 1.00  | 5.00  |
| Sce 4 | 3.00  | 0.33  | 0.20  | 1.00  |
|       | 16.00 | 4.53  | 1.68  | 9.33  |

|       | Sce 1 | Sce 2 | Sce 3 | Sce 4 | Everage (a) |
|-------|-------|-------|-------|-------|-------------|
| Sce 1 | 0.06  | 0.04  | 0.09  | 0.04  | 0.0569      |
| Sce 2 | 0.31  | 0.22  | 0.20  | 0.32  | 0.2633      |
| Sce 3 | 0.44  | 0.66  | 0.60  | 0.54  | 0.5579      |
| Sce 4 | 0.19  | 0.07  | 0.12  | 0.11  | 0.1219      |
|       | 1.00  | 1.00  | 1.00  | 1.00  |             |

| mmult(b) | (a x b) | Lamda | CI    | RI    | CR    |
|----------|---------|-------|-------|-------|-------|
| 0.230    | 4.041   | 4.118 | 0.039 | 0.990 | 0.040 |
| 1.099    | 4.175   |       |       |       |       |
| 2.356    | 4.222   |       |       |       |       |
| 0.492    | 4.036   |       |       |       |       |

S13.4 Scenario assessment based on (C5) Comprehensive Planning

|       | Sce 1 | Sce 2 | Sce 3 | Sce 4 |
|-------|-------|-------|-------|-------|
| Sce 1 | 1.00  | 0.25  | 0.14  | 0.33  |
| Sce 2 | 4.00  | 1.00  | 0.33  | 3.00  |
| Sce 3 | 7.00  | 3.00  | 1.00  | 5.00  |
| Sce 4 | 3.00  | 0.33  | 0.20  | 1.00  |
|       | 15.00 | 4.58  | 1.68  | 9.33  |

|       | Sce 1 | Sce 2 | Sce 3 | Sce 4 | Everage<br>(a) | mmult(b) | (a x b) | Lamda | CI    | RI    | CR    |
|-------|-------|-------|-------|-------|----------------|----------|---------|-------|-------|-------|-------|
| Sce 1 | 0.07  | 0.05  | 0.09  | 0.04  | 0.0605         | 0.245    | 4.054   | 4.121 | 0.040 | 0.990 | 0.041 |
| Sce 2 | 0.27  | 0.22  | 0.20  | 0.32  | 0.2513         | 1.056    | 4.201   |       |       |       |       |
| Sce 3 | 0.47  | 0.65  | 0.60  | 0.54  | 0.5634         | 2.365    | 4.198   |       |       |       |       |
| Sce 4 | 0.20  | 0.07  | 0.12  | 0.11  | 0.1248         | 0.503    | 4.029   |       |       |       |       |
|       | 1.00  | 1.00  | 1.00  | 1.00  |                |          |         |       |       |       |       |

S13.5 Scenario assessment based on (C8) Visitor management

|       | Sce 1 | Sce 2 | Sce 3 | Sce 4 |
|-------|-------|-------|-------|-------|
| Sce 1 | 1.00  | 0.33  | 0.20  | 0.14  |
| Sce 2 | 3.00  | 1.00  | 0.33  | 0.20  |
| Sce 3 | 5.00  | 3.00  | 1.00  | 0.33  |
| Sce 4 | 7.00  | 5.00  | 3.00  | 1.00  |
|       | 16.00 | 9.33  | 4.53  | 1.68  |

|       | Sce 1 | Sce 2 | Sce 3 | Sce 4 | Everage<br>(a) | mmult(b) | (a x b) | Lamda | CI    | RI    | CR    |
|-------|-------|-------|-------|-------|----------------|----------|---------|-------|-------|-------|-------|
| Sce 1 | 0.06  | 0.04  | 0.04  | 0.09  | 0.0569         | 0.230    | 4.041   | 4.118 | 0.039 | 0.990 | 0.040 |
| Sce 2 | 0.19  | 0.11  | 0.07  | 0.12  | 0.1219         | 0.492    | 4.036   |       |       |       |       |
| Sce 3 | 0.31  | 0.32  | 0.22  | 0.20  | 0.2633         | 1.099    | 4.175   |       |       |       |       |
| Sce 4 | 0.44  | 0.54  | 0.66  | 0.60  | 0.5579         | 2.356    | 4.222   |       |       |       |       |
|       | 1.00  | 1.00  | 1.00  | 1.00  |                |          |         |       |       |       |       |

S13.6 Scenario assessment based on (C13) Suporting Cultural Event

|       | Sce 1 | Sce 2 | Sce 3 | Sce 4 |
|-------|-------|-------|-------|-------|
| Sce 1 | 1.00  | 0.33  | 0.20  | 0.13  |
| Sce 2 | 3.00  | 1.00  | 0.33  | 0.20  |
| Sce 3 | 5.00  | 3.00  | 1.00  | 0.33  |
| Sce 4 | 8.00  | 5.00  | 3.00  | 1.00  |
|       | 17.00 | 9.33  | 4.53  | 1.66  |

|       | Sce 1 | Sce 2 | Sce 3 | Sce 4 | Everage (a) |
|-------|-------|-------|-------|-------|-------------|
| Sce 1 | 0.06  | 0.04  | 0.04  | 0.08  | 0.0535      |
| Sce 2 | 0.18  | 0.11  | 0.07  | 0.12  | 0.1194      |
| Sce 3 | 0.29  | 0.32  | 0.22  | 0.20  | 0.2593      |
| Sce 4 | 0.47  | 0.54  | 0.66  | 0.60  | 0.5678      |
|       | 1.00  | 1.00  | 1.00  | 1.00  |             |

| mmult(b) | (a x b) | Lamda | CI    | RI    | CR    |
|----------|---------|-------|-------|-------|-------|
| 0.216    | 4.040   | 4.094 | 0.031 | 0.990 | 0.032 |
| 0.480    | 4.018   |       |       |       |       |
| 1.074    | 4.144   |       |       |       |       |
| 2.371    | 4.176   |       |       |       |       |

S13.7 Scenario assessment Tourism and Culture Office of Banjarnegara Regency (Dispar Banjarnegara)

|       | C4     | C1     | C5     | C8     | C13    | Kriteria | S13-Scenario |
|-------|--------|--------|--------|--------|--------|----------|--------------|
| Sce 1 | 0.0605 | 0.0569 | 0.0605 | 0.0569 | 0.0535 | 0.0422   | 5.8%         |
| Sce 2 | 0.2513 | 0.2633 | 0.2513 | 0.1219 | 0.1194 | 0.0826   | 19.9%        |
| Sce 3 | 0.5634 | 0.5579 | 0.5634 | 0.2633 | 0.2593 | 0.4650   | 43.9%        |
| Sce 4 | 0.1248 | 0.1219 | 0.1248 | 0.5579 | 0.5678 | 0.2638   | 30.4%        |
|       |        |        |        |        |        | 0.1464   |              |

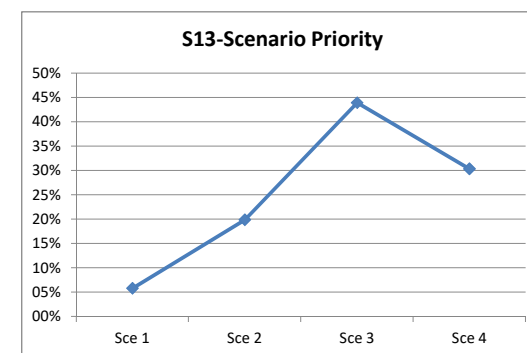

## S14. Land Transportation Organization Banjarnegara (Organda Banjarnegara)

### S14.1 Criteria assessment Land Transportation Organization Banjarnegara (Organda Banjarnegara)

| Criteria | C4    | C1    | C5   | C2   | C11  |
|----------|-------|-------|------|------|------|
| C4       | 1.00  | 0.33  | 0.14 | 0.17 | 0.25 |
| C1       | 3.00  | 1.00  | 0.20 | 0.25 | 0.33 |
| C5       | 7.00  | 5.00  | 1.00 | 3.00 | 5.00 |
| C2       | 6.00  | 4.00  | 0.33 | 1.00 | 3.00 |
| C11      | 4.00  | 3.00  | 0.20 | 0.33 | 1.00 |
|          | 21.00 | 13.33 | 1.88 | 4.75 | 9.58 |

| Criteria | C4   | C1   | C5   | C2   | C11  | Everage (a) |
|----------|------|------|------|------|------|-------------|
| C4       | 0.05 | 0.03 | 0.08 | 0.04 | 0.03 | 0.04        |
| C1       | 0.14 | 0.08 | 0.11 | 0.05 | 0.03 | 0.08        |
| C5       | 0.33 | 0.38 | 0.53 | 0.63 | 0.52 | 0.48        |
| C2       | 0.29 | 0.30 | 0.18 | 0.21 | 0.31 | 0.26        |
| C11      | 0.19 | 0.23 | 0.11 | 0.07 | 0.10 | 0.14        |
|          | 1.00 | 1.00 | 1.00 | 1.00 | 1.00 |             |

| mmult(b) | (a x b) | Lamda | CI    | RI    | CR    |
|----------|---------|-------|-------|-------|-------|
| 0.181    | 4.305   | 4.186 | 0.062 | 0.990 | 0.063 |
| 0.368    | 4.473   |       |       |       |       |
| 1.957    | 4.086   |       |       |       |       |
| 0.998    | 3.879   |       |       |       |       |

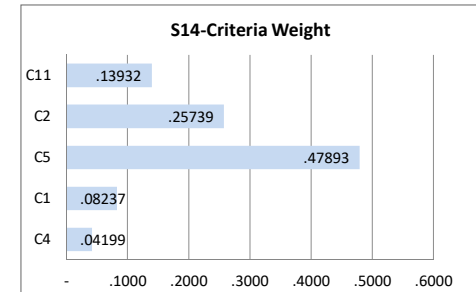

### S14.2 Scenario assessment based on (C4) Various transport System

|       | Sce 1 | Sce 2 | Sce 3 | Sce 4 |
|-------|-------|-------|-------|-------|
| Sce 1 | 1.00  | 0.33  | 0.14  | 0.20  |
| Sce 2 | 3.00  | 1.00  | 0.20  | 0.33  |
| Sce 3 | 7.00  | 5.00  | 1.00  | 3.00  |
| Sce 4 | 5.00  | 3.00  | 0.33  | 1.00  |
|       | 16.00 | 9.33  | 1.68  | 4.53  |

|       | Sce 1 | Sce 2 | Sce 3 | Sce 4 | Everage (a) |
|-------|-------|-------|-------|-------|-------------|
| Sce 1 | 0.06  | 0.04  | 0.09  | 0.04  | 0.0569      |
| Sce 2 | 0.19  | 0.11  | 0.12  | 0.07  | 0.1219      |
| Sce 3 | 0.44  | 0.54  | 0.60  | 0.66  | 0.5579      |
| Sce 4 | 0.31  | 0.32  | 0.20  | 0.22  | 0.2633      |
|       | 1.00  | 1.00  | 1.00  | 1.00  |             |

| mmult(b) | (a x b) | Lamda | CI    | RI    | CR    |
|----------|---------|-------|-------|-------|-------|
| 0.230    | 4.041   | 4.118 | 0.039 | 0.990 | 0.040 |
| 0.492    | 4.036   |       |       |       |       |
| 2.356    | 4.222   |       |       |       |       |
| 1.099    | 4.175   |       |       |       |       |

### S14.3 Scenario assessment based on (C1) Integration Transport System

|       | Sce 1 | Sce 2 | Sce 3 | Sce 4 |
|-------|-------|-------|-------|-------|
| Sce 1 | 1.00  | 0.33  | 0.14  | 0.20  |
| Sce 2 | 3.00  | 1.00  | 0.20  | 0.33  |
| Sce 3 | 7.00  | 5.00  | 1.00  | 3.00  |
| Sce 4 | 5.00  | 3.00  | 0.33  | 1.00  |
|       | 16.00 | 9.33  | 1.68  | 4.53  |

|       | Sce 1 | Sce 2 | Sce 3 | Sce 4 | Everage (a) |
|-------|-------|-------|-------|-------|-------------|
| Sce 1 | 0.06  | 0.04  | 0.09  | 0.04  | 0.0569      |
| Sce 2 | 0.19  | 0.11  | 0.12  | 0.07  | 0.1219      |
| Sce 3 | 0.44  | 0.54  | 0.60  | 0.66  | 0.5579      |
| Sce 4 | 0.31  | 0.32  | 0.20  | 0.22  | 0.2633      |
|       | 1.00  | 1.00  | 1.00  | 1.00  |             |

| mmult(b) | (a x b) | Lamda | CI    | RI    | CR    |
|----------|---------|-------|-------|-------|-------|
| 0.230    | 4.041   | 4.118 | 0.039 | 0.990 | 0.040 |
| 0.492    | 4.036   |       |       |       |       |
| 2.356    | 4.222   |       |       |       |       |
| 1.099    | 4.175   |       |       |       |       |

S14.4 Scenario assessment based on (C5) Comprehensive Planning

| Sce 1 | Sce 2 | Sce 3 | Sce 4 |      | Sce 1 | Sce 2 | Sce 3 | Sce 4 | Everage<br>(a) | mmult(b) | (a x b) | Lamda | CI    | RI    | CR    |       |
|-------|-------|-------|-------|------|-------|-------|-------|-------|----------------|----------|---------|-------|-------|-------|-------|-------|
| Sce 1 | 1.00  | 0.33  | 0.20  | 0.14 | Sce 1 | 0.06  | 0.04  | 0.04  | 0.09           | 0.0569   | 0.230   | 4.041 | 4.118 | 0.039 | 0.990 | 0.040 |
| Sce 2 | 3.00  | 1.00  | 0.33  | 0.20 | Sce 2 | 0.19  | 0.11  | 0.07  | 0.12           | 0.1219   | 0.492   | 4.036 |       |       |       |       |
| Sce 3 | 5.00  | 3.00  | 1.00  | 0.33 | Sce 3 | 0.31  | 0.32  | 0.22  | 0.20           | 0.2633   | 1.099   | 4.175 |       |       |       |       |
| Sce 4 | 7.00  | 5.00  | 3.00  | 1.00 | Sce 4 | 0.44  | 0.54  | 0.66  | 0.60           | 0.5579   | 2.356   | 4.222 |       |       |       |       |
| 16.00 | 9.33  | 4.53  | 1.68  |      | 1.00  | 1.00  | 1.00  | 1.00  |                |          |         |       |       |       |       |       |

S14.5 Scenario assessment based on (C2) Safety and security

| Sce 1 |       |       |       |       | Sce 2 |       |       |       |       | Sce 3  |       |       |       |       | Sce 4 |       |  |  |  | Everage (a) |  |  |  |  | mmult(b) | (a x b) | Lamda | CI | RI | CR |
|-------|-------|-------|-------|-------|-------|-------|-------|-------|-------|--------|-------|-------|-------|-------|-------|-------|--|--|--|-------------|--|--|--|--|----------|---------|-------|----|----|----|
| Sce 1 | Sce 2 | Sce 3 | Sce 4 | Sce 1 | Sce 2 | Sce 3 | Sce 4 | Sce 1 | Sce 2 | Sce 3  | Sce 4 | Sce 1 | Sce 2 | Sce 3 | Sce 4 |       |  |  |  |             |  |  |  |  |          |         |       |    |    |    |
| Sce 1 | 1.00  | 0.33  | 0.20  | 0.14  | Sce 1 | 0.06  | 0.04  | 0.04  | 0.09  | 0.0569 | 0.230 | 4.041 | 4.118 | 0.039 | 0.990 | 0.040 |  |  |  |             |  |  |  |  |          |         |       |    |    |    |
| Sce 2 | 3.00  | 1.00  | 0.33  | 0.20  | Sce 2 | 0.19  | 0.11  | 0.07  | 0.12  | 0.1219 | 0.492 | 4.036 |       |       |       |       |  |  |  |             |  |  |  |  |          |         |       |    |    |    |
| Sce 3 | 5.00  | 3.00  | 1.00  | 0.33  | Sce 3 | 0.31  | 0.32  | 0.22  | 0.20  | 0.2633 | 1.099 | 4.175 |       |       |       |       |  |  |  |             |  |  |  |  |          |         |       |    |    |    |
| Sce 4 | 7.00  | 5.00  | 3.00  | 1.00  | Sce 4 | 0.44  | 0.54  | 0.66  | 0.60  | 0.5579 | 2.356 | 4.222 |       |       |       |       |  |  |  |             |  |  |  |  |          |         |       |    |    |    |
| 16.00 |       |       |       |       | 9.33  |       |       |       |       | 4.53   |       |       |       |       | 1.68  |       |  |  |  |             |  |  |  |  |          |         |       |    |    |    |

S14.6 Scenario assessment based on (C11) Efisiensi Operasional

|       | Sce 1 | Sce 2 | Sce 3 | Sce 4 |  | Sce 1 | Sce 2 | Sce 3 | Sce 4 | Everage<br>(a) | mmult(b) | (a x b) | Lamda | CI    | RI    | CR    |
|-------|-------|-------|-------|-------|--|-------|-------|-------|-------|----------------|----------|---------|-------|-------|-------|-------|
| Sce 1 | 1.00  | 0.33  | 0.20  | 0.14  |  | Sce 1 | 0.07  | 0.04  | 0.04  | 0.0579         | 0.232    | 3.999   | 4.095 | 0.032 | 0.990 | 0.032 |
| Sce 2 | 3.00  | 1.00  | 0.33  | 0.20  |  | Sce 2 | 0.20  | 0.11  | 0.07  | 0.1250         | 0.498    | 3.984   |       |       |       |       |
| Sce 3 | 5.00  | 3.00  | 1.00  | 0.33  |  | Sce 3 | 0.33  | 0.32  | 0.22  | 0.2686         | 1.116    | 4.156   |       |       |       |       |
| Sce 4 | 6.00  | 5.00  | 3.00  | 1.00  |  | Sce 4 | 0.40  | 0.54  | 0.66  | 0.5485         | 2.327    | 4.242   |       |       |       |       |
|       | 15.00 | 9.33  | 4.53  | 1.68  |  |       | 1.00  | 1.00  | 1.00  | 1.00           |          |         |       |       |       |       |

S14.7 Scenario assessment Land Transportation Organization Banjarnegara (Organda Banjarnegara)

|       | C4     | C1     | C5     | C2     | C11    | CRITERIA | S14-<br>Scenario |
|-------|--------|--------|--------|--------|--------|----------|------------------|
| Sce 1 | 0.0569 | 0.0569 | 0.0569 | 0.0569 | 0.0579 | 0.0420   | 5.70%            |
| Sce 2 | 0.1219 | 0.1219 | 0.1219 | 0.1219 | 0.1250 | 0.0824   | 12.23%           |
| Sce 3 | 0.5579 | 0.5579 | 0.2633 | 0.2633 | 0.2686 | 0.4789   | 30.07%           |
| Sce 4 | 0.2633 | 0.2633 | 0.5579 | 0.5579 | 0.5485 | 0.2574   | 52.00%           |
|       |        |        |        |        |        | 0.1393   |                  |

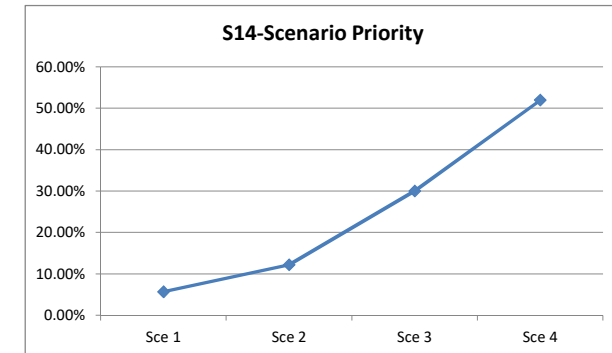

**S15.1 Criteria assessment Pokdarwis Dieng Pandhawa (Tourism Awareness Group )**

[illegible]

| Criteria | Weight  |
|----------|---------|
| C13      | 0.08556 |
| C9       | 0.43316 |
| C5       | 0.14881 |
| C3       | 0.05048 |
| C2       | 0.25003 |
| C1       | 0.03195 |

|       | Sce 1 | Sce 2 | Sce 3 | Sce 4 |
|-------|-------|-------|-------|-------|
| Sce 1 | 1.00  | 0.33  | 0.20  | 3.00  |
| Sce 2 | 3.00  | 1.00  | 0.33  | 5.00  |
| Sce 3 | 5.00  | 3.00  | 1.00  | 7.00  |
| Sce 4 | 0.33  | 0.20  | 0.14  | 1.00  |
|       | 9.33  | 4.53  | 1.68  | 16.00 |

|       | Sce 1 | Sce 2 | Sce 3 | Sce 4 | Everage<br>(a) |
|-------|-------|-------|-------|-------|----------------|
| Sce 1 | 0.11  | 0.07  | 0.12  | 0.19  | 12.2%          |
| Sce 2 | 0.32  | 0.22  | 0.20  | 0.31  | 26.3%          |
| Sce 3 | 0.54  | 0.66  | 0.60  | 0.44  | 55.8%          |
| Sce 4 | 0.04  | 0.04  | 0.09  | 0.06  | 5.7%           |
|       | 1.00  | 1.00  | 1.00  | 1.00  |                |

|       |       |
|-------|-------|
| 0.230 | 4.041 |
|-------|-------|

|       | Sce 1 | Sce 2 | Sce 3 | Sce 4 |
|-------|-------|-------|-------|-------|
| Sce 1 | 1.00  | 0.33  | 0.20  | 0.17  |
| Sce 2 | 3.00  | 1.00  | 0.33  | 0.25  |
| Sce 3 | 5.00  | 3.00  | 1.00  | 0.50  |
| Sce 4 | 6.00  | 4.00  | 2.00  | 1.00  |
|       | 15.00 | 8.33  | 3.53  | 1.92  |

| Scenario | Sce 1 | Sce 2 | Sce 3 | Sce 4 | Everage<br>(a) |
|----------|-------|-------|-------|-------|----------------|
| Sce 1    | 0.07  | 0.04  | 0.06  | 0.09  | 6.3%           |
| Sce 2    | 0.20  | 0.12  | 0.09  | 0.13  | 13.6%          |
| Sce 3    | 0.33  | 0.36  | 0.28  | 0.26  | 30.9%          |
| Sce 4    | 0.40  | 0.48  | 0.57  | 0.52  | 49.2%          |
|          | 1.00  | 1.00  | 1.00  | 1.00  |                |

|       |       |
|-------|-------|
| 2.031 | 4.128 |
|-------|-------|



S15.4 Scenario assessment based on (C3) Accesibility

|       | Sce 1 | Sce 2 | Sce 3 | Sce 4 |
|-------|-------|-------|-------|-------|
| Sce 1 | 1.00  | 0.33  | 0.20  | 3.00  |
| Sce 2 | 3.00  | 1.00  | 0.33  | 4.00  |
| Sce 3 | 5.00  | 3.00  | 1.00  | 6.00  |
| Sce 4 | 0.33  | 0.25  | 0.17  | 1.00  |
|       | 9.33  | 4.58  | 1.70  | 14.00 |

| Scenario | Sce 1 | Sce 2 | Sce 3 | Sce 4 | Everage (a) |
|----------|-------|-------|-------|-------|-------------|
| Sce 1    | 0.11  | 0.07  | 0.12  | 0.21  | 12.8%       |
| Sce 2    | 0.32  | 0.22  | 0.20  | 0.29  | 25.5%       |
| Sce 3    | 0.54  | 0.65  | 0.59  | 0.43  | 55.2%       |
| Sce 4    | 0.04  | 0.05  | 0.10  | 0.07  | 6.5%        |
|          | 1.00  | 1.00  | 1.00  | 1.00  |             |

| mmult(b) | (a x b) | Lamda | CI    | RI    | CR    |
|----------|---------|-------|-------|-------|-------|
| 0.518    | 4.050   | 4.150 | 0.050 | 0.990 | 0.051 |
| 1.083    | 4.241   |       |       |       |       |
| 2.347    | 4.254   |       |       |       |       |
| 0.263    | 4.056   |       |       |       |       |

S15.5 Scenario assessment based on (C5) Comprehensif Planning

|       | Sce 1 | Sce 2 | Sce 3 | Sce 4 |
|-------|-------|-------|-------|-------|
| Sce 1 | 1.00  | 0.20  | 0.17  | 0.33  |
| Sce 2 | 5.00  | 1.00  | 0.33  | 3.00  |
| Sce 3 | 6.00  | 3.00  | 1.00  | 4.00  |
| Sce 4 | 3.00  | 0.33  | 0.25  | 1.00  |
|       | 15.00 | 4.53  | 1.75  | 8.33  |

| Scenario | Sce 1 | Sce 2 | Sce 3 | Sce 4 | Everage (a) |
|----------|-------|-------|-------|-------|-------------|
| Sce 1    | 0.07  | 0.04  | 0.10  | 0.04  | 6.2%        |
| Sce 2    | 0.33  | 0.22  | 0.19  | 0.36  | 27.6%       |
| Sce 3    | 0.40  | 0.66  | 0.57  | 0.48  | 52.8%       |
| Sce 4    | 0.20  | 0.07  | 0.14  | 0.12  | 13.4%       |
|          | 1.00  | 1.00  | 1.00  | 1.00  |             |

| mmult(b) | (a x b) | Lamda | CI    | RI    | CR    |
|----------|---------|-------|-------|-------|-------|
| 0.249    | 4.056   | 4.148 | 0.049 | 0.990 | 0.050 |
| 1.162    | 4.209   |       |       |       |       |
| 2.262    | 4.282   |       |       |       |       |
| 0.543    | 4.047   |       |       |       |       |

S15.6 Scenario assessment based on (C9) Supporting local entrepreneurs

|       | Sce 1 | Sce 2 | Sce 3 | Sce 4 |
|-------|-------|-------|-------|-------|
| Sce 1 | 1.00  | 3.00  | 4.00  | 6.00  |
| Sce 2 | 0.33  | 1.00  | 2.00  | 5.00  |
| Sce 3 | 0.25  | 0.50  | 1.00  | 3.00  |
| Sce 4 | 0.17  | 0.20  | 0.33  | 1.00  |
|       | 1.75  | 4.70  | 7.33  | 15.00 |

|       | Sce 1 | Sce 2 | Sce 3 | Sce 4 | Everage (a) |
|-------|-------|-------|-------|-------|-------------|
| Sce 1 | 0.57  | 0.64  | 0.55  | 0.40  | 53.9%       |
| Sce 2 | 0.19  | 0.21  | 0.27  | 0.33  | 25.2%       |
| Sce 3 | 0.14  | 0.11  | 0.14  | 0.20  | 14.6%       |
| Sce 4 | 0.10  | 0.04  | 0.05  | 0.07  | 6.2%        |
|       | 1.00  | 1.00  | 1.00  | 1.00  |             |

| mmult(b) | (a x b) | Lamda | CI    | RI    | CR    |
|----------|---------|-------|-------|-------|-------|
| 2.256    | 4.188   | 4.097 | 0.032 | 0.990 | 0.032 |
| 1.037    | 4.110   |       |       |       |       |
| 0.595    | 4.062   |       |       |       |       |
| 0.252    | 4.026   |       |       |       |       |

S15.7 Scenario assessment based on (C13) Suporting Cultural Event

|       | Sce 1 | Sce 2 | Sce 3 | Sce 4 |
|-------|-------|-------|-------|-------|
| Sce 1 | 1.00  | 0.33  | 0.14  | 0.20  |
| Sce 2 | 3.00  | 1.00  | 0.20  | 0.50  |
| Sce 3 | 7.00  | 5.00  | 1.00  | 3.00  |
| Sce 4 | 5.00  | 2.00  | 0.33  | 1.00  |
|       | 16.00 | 8.33  | 1.68  | 4.70  |

S15.7

|       | Sce 1 | Sce 2 | Sce 3 | Sce 4 | Everage (a) |
|-------|-------|-------|-------|-------|-------------|
| Sce 1 | 0.06  | 0.04  | 0.09  | 0.04  | 5.8%        |
| Sce 2 | 0.19  | 0.12  | 0.12  | 0.11  | 13.3%       |
| Sce 3 | 0.44  | 0.60  | 0.60  | 0.64  | 56.8%       |
| Sce 4 | 0.31  | 0.24  | 0.20  | 0.21  | 24.1%       |
|       | 1.00  | 1.00  | 1.00  | 1.00  |             |

| mmult(b) | (a x b) | Lamda | CI    | RI    | CR    |
|----------|---------|-------|-------|-------|-------|
| 0.231    | 4.019   | 4.078 | 0.026 | 0.990 | 0.026 |
| 0.540    | 4.052   |       |       |       |       |
| 2.361    | 4.155   |       |       |       |       |
| 0.985    | 4.086   |       |       |       |       |

S15.8 Scenario assessment by Pokdarwis Dieng Pandhawa (Tourism Awareness Group )

|       | C1     | C2     | C3     | C5     | C9     | C13    | Criteria | S15-Scenario Priority |
|-------|--------|--------|--------|--------|--------|--------|----------|-----------------------|
| Sce 1 | 0.1219 | 0.0626 | 0.1280 | 0.0615 | 0.5388 | 0.0576 | 0.0319   | 27.3%                 |
| Sce 2 | 0.2633 | 0.1362 | 0.2554 | 0.2761 | 0.2523 | 0.1333 | 0.2500   | 21.7%                 |
| Sce 3 | 0.5579 | 0.3093 | 0.5518 | 0.5283 | 0.1464 | 0.5681 | 0.0505   | 31.4%                 |
| Sce 4 | 0.0569 | 0.4919 | 0.0649 | 0.1341 | 0.0625 | 0.2410 | 0.1488   | 19.6%                 |
|       |        |        |        |        |        |        | 0.4332   |                       |
|       |        |        |        |        |        |        | 0.0856   |                       |

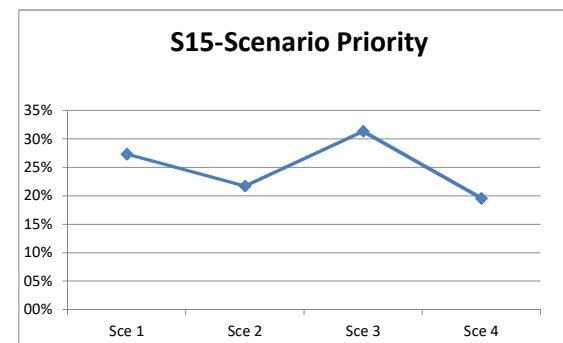

## S16. Pokdarwis Dieng Kulon (Tourism Awareness Group )

### S16.1 Criteria assessment Pokdarwis Dieng Kulon (Tourism Awareness Group )

| Criteria | C1    | C2   | C3    | C5   | C9   | C13   |
|----------|-------|------|-------|------|------|-------|
| C1       | 1.00  | 0.13 | 0.50  | 0.20 | 0.14 | 0.33  |
| C2       | 8.00  | 1.00 | 6.00  | 5.00 | 2.00 | 5.00  |
| C3       | 2.00  | 0.17 | 1.00  | 0.25 | 0.17 | 0.50  |
| C5       | 5.00  | 0.20 | 4.00  | 1.00 | 0.50 | 2.00  |
| C9       | 7.00  | 0.50 | 6.00  | 2.00 | 1.00 | 4.00  |
| C13      | 3.00  | 0.20 | 2.00  | 0.50 | 0.25 | 1.00  |
|          | 26.00 | 2.19 | 19.50 | 8.95 | 4.06 | 12.83 |

| Criteria | C1   | C2   | C3   | C5   | C9   | C13  | Everage (a) |
|----------|------|------|------|------|------|------|-------------|
| C1       | 0.04 | 0.06 | 0.03 | 0.02 | 0.04 | 0.03 | 3.4%        |
| C2       | 0.31 | 0.46 | 0.31 | 0.56 | 0.49 | 0.39 | 41.9%       |
| C3       | 0.08 | 0.08 | 0.05 | 0.03 | 0.04 | 0.04 | 5.2%        |
| C5       | 0.19 | 0.09 | 0.21 | 0.11 | 0.12 | 0.16 | 14.7%       |
| C9       | 0.27 | 0.23 | 0.31 | 0.22 | 0.25 | 0.31 | 26.4%       |
| C13      | 0.12 | 0.09 | 0.10 | 0.06 | 0.06 | 0.08 | 8.4%        |
|          | 1.00 | 1.00 | 1.00 | 1.00 | 1.00 | 1.00 | 1.00        |

| mmult(b) | (a x b) | Lamda | CI    | RI    | CR    |
|----------|---------|-------|-------|-------|-------|
| 0.208    | 6.086   | 6.180 | 0.036 | 1.320 | 0.027 |
| 2.686    | 6.414   |       |       |       |       |
| 0.313    | 6.012   |       |       |       |       |
| 0.909    | 6.204   |       |       |       |       |
| 1.654    | 6.256   |       |       |       |       |
| 0.514    | 6.108   |       |       |       |       |

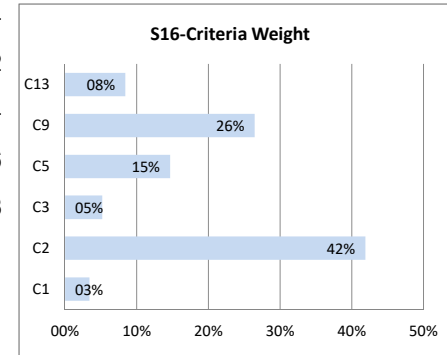

### S16.2 Scenario assessment based on (C1) Integration Transport System

| Scenario | Sce 1 | Sce 2 | Sce 3 | Sce 4 |
|----------|-------|-------|-------|-------|
| Sce 1    | 1.00  | 0.20  | 0.33  | 3.00  |
| Sce 2    | 5.00  | 1.00  | 3.00  | 6.00  |
| Sce 3    | 3.00  | 0.33  | 1.00  | 4.00  |
| Sce 4    | 0.33  | 0.17  | 0.25  | 1.00  |
|          | 9.33  | 1.70  | 4.58  | 14.00 |

| Scenario | Sce 1 | Sce 2 | Sce 3 | Sce 4 | Everage (a) |
|----------|-------|-------|-------|-------|-------------|
| Sce 1    | 0.11  | 0.12  | 0.07  | 0.21  | 13%         |
| Sce 2    | 0.54  | 0.59  | 0.65  | 0.43  | 55%         |
| Sce 3    | 0.32  | 0.20  | 0.22  | 0.29  | 26%         |
| Sce 4    | 0.04  | 0.10  | 0.05  | 0.07  | 6%          |
|          | 1.00  | 1.00  | 1.00  | 1.00  |             |

| mmult(b) | (a x b) | Lamda | CI    | RI    | CR    |
|----------|---------|-------|-------|-------|-------|
| 0.518    | 4.050   | 4.150 | 0.050 | 0.990 | 0.051 |
| 2.347    | 4.254   |       |       |       |       |
| 1.083    | 4.241   |       |       |       |       |
| 0.263    | 4.056   |       |       |       |       |

### S16.3 Scenario assessment based on (C2) Safety and security

| Scenario | Sce 1 | Sce 2 | Sce 3 | Sce 4 |
|----------|-------|-------|-------|-------|
| Sce 1    | 1.00  | 0.50  | 0.17  | 0.25  |
| Sce 2    | 2.00  | 1.00  | 0.25  | 0.50  |
| Sce 3    | 6.00  | 4.00  | 1.00  | 2.00  |
| Sce 4    | 4.00  | 2.00  | 0.50  | 1.00  |
|          | 13.00 | 7.50  | 1.92  | 3.75  |

| Scenario | Sce 1 | Sce 2 | Sce 3 | Sce 4 | Everage (a) |
|----------|-------|-------|-------|-------|-------------|
| Sce 1    | 0.08  | 0.07  | 0.09  | 0.07  | 7.4%        |
| Sce 2    | 0.15  | 0.13  | 0.13  | 0.13  | 13.8%       |
| Sce 3    | 0.46  | 0.53  | 0.52  | 0.53  | 51.2%       |
| Sce 4    | 0.31  | 0.27  | 0.26  | 0.27  | 27.5%       |
|          | 1.00  | 1.00  | 1.00  | 1.00  |             |

| mmult(b) | (a x b) | Lamda | CI    | RI    | CR    |
|----------|---------|-------|-------|-------|-------|
| 0.297    | 4.003   | 4.010 | 0.003 | 0.990 | 0.003 |
| 0.552    | 4.009   |       |       |       |       |
| 2.060    | 4.020   |       |       |       |       |
| 1.104    | 4.009   |       |       |       |       |

S16.4 Scenario assessment based on (C3) Accesibility

| Scenario | Sce 1 | Sce 2 | Sce 3 | Sce 4 |
|----------|-------|-------|-------|-------|
| Sce 1    | 1.00  | 0.20  | 0.50  | 2.00  |
| Sce 2    | 5.00  | 1.00  | 2.00  | 6.00  |
| Sce 3    | 2.00  | 0.50  | 1.00  | 4.00  |
| Sce 4    | 0.50  | 0.17  | 0.25  | 1.00  |
|          | 8.50  | 1.87  | 3.75  | 13.00 |

| Scenario | Sce 1 | Sce 2 | Sce 3 | Sce 4 | Everage<br>(a) |
|----------|-------|-------|-------|-------|----------------|
| Sce 1    | 0.12  | 0.11  | 0.13  | 0.15  | 12.8%          |
| Sce 2    | 0.59  | 0.54  | 0.53  | 0.46  | 53.0%          |
| Sce 3    | 0.24  | 0.27  | 0.27  | 0.31  | 26.9%          |
| Sce 4    | 0.06  | 0.09  | 0.07  | 0.08  | 7.3%           |
|          | 1.00  | 1.00  | 1.00  | 1.00  |                |

| mmult(b) | (a x b) | Lamda | CI    | RI    | CR    |
|----------|---------|-------|-------|-------|-------|
| 0.514    | 4.020   | 4.025 | 0.008 | 0.990 | 0.008 |
| 2.146    | 4.051   |       |       |       |       |
| 1.082    | 4.016   |       |       |       |       |
| 0.293    | 4.012   |       |       |       |       |

S16.5 Scenario assessment based on (C5) Comprehensif Planning

| Scenario | Sce 1 | Sce 2 | Sce 3 | Sce 4 |
|----------|-------|-------|-------|-------|
| Sce 1    | 1.00  | 0.20  | 0.14  | 0.33  |
| Sce 2    | 5.00  | 1.00  | 0.50  | 2.00  |
| Sce 3    | 7.00  | 2.00  | 1.00  | 4.00  |
| Sce 4    | 3.00  | 0.50  | 0.25  | 1.00  |
|          | 16.00 | 3.70  | 1.89  | 7.33  |

| Scenario | Sce 1 | Sce 2 | Sce 3 | Sce 4 | Everage<br>(a) |
|----------|-------|-------|-------|-------|----------------|
| Sce 1    | 0.06  | 0.05  | 0.08  | 0.05  | 5.9%           |
| Sce 2    | 0.31  | 0.27  | 0.26  | 0.27  | 28.0%          |
| Sce 3    | 0.44  | 0.54  | 0.53  | 0.55  | 51.3%          |
| Sce 4    | 0.19  | 0.14  | 0.13  | 0.14  | 14.8%          |
|          | 1.00  | 1.00  | 1.00  | 1.00  |                |

| mmult(b) | (a x b) | Lamda | CI    | RI    | CR    |
|----------|---------|-------|-------|-------|-------|
| 0.238    | 4.007   | 4.028 | 0.009 | 0.990 | 0.010 |
| 1.129    | 4.033   |       |       |       |       |
| 2.079    | 4.054   |       |       |       |       |
| 0.594    | 4.020   |       |       |       |       |

#### S16.6 Scenario assessment based on (C9) Supporting local entrepreneurs

| Scenario | Sce 1 | Sce 2 | Sce 3 | Sce 4 |
|----------|-------|-------|-------|-------|
| Sce 1    | 1.00  | 0.33  | 3.00  | 4.00  |
| Sce 2    | 3.00  | 1.00  | 5.00  | 6.00  |
| Sce 3    | 0.33  | 0.20  | 1.00  | 2.00  |
| Sce 4    | 0.25  | 0.17  | 0.50  | 1.00  |
|          | 4.58  | 1.70  | 9.50  | 13.00 |

| Scenario | Sce 1 | Sce 2 | Sce 3 | Sce 4 | Everage (a) |
|----------|-------|-------|-------|-------|-------------|
| Sce 1    | 0.22  | 0.20  | 0.32  | 0.31  | 25.9%       |
| Sce 2    | 0.65  | 0.59  | 0.53  | 0.46  | 55.8%       |
| Sce 3    | 0.07  | 0.12  | 0.11  | 0.15  | 11.2%       |
| Sce 4    | 0.05  | 0.10  | 0.05  | 0.08  | 7.1%        |
|          | 1.00  | 1.00  | 1.00  | 1.00  |             |

| mmult(b) | (a x b) | Lamda | CI    | RI    | CR    |
|----------|---------|-------|-------|-------|-------|
| 1.065    | 4.103   | 4.079 | 0.026 | 0.990 | 0.027 |
| 2.321    | 4.162   |       |       |       |       |
| 0.451    | 4.018   |       |       |       |       |
| 0.285    | 4.034   |       |       |       |       |

#### S16.7 Scenario assessment based on (C13) Suporting Cultural Event

| Scenario | Sce 1 | Sce 2 | Sce 3 | Sce 4 |
|----------|-------|-------|-------|-------|
| Sce 1    | 1.00  | 0.33  | 0.20  | 0.14  |
| Sce 2    | 3.00  | 1.00  | 0.33  | 0.20  |
| Sce 3    | 5.00  | 3.00  | 1.00  | 0.33  |
| Sce 4    | 7.00  | 5.00  | 3.00  | 1.00  |
|          | 16.00 | 9.33  | 4.53  | 1.68  |

| Scenario | Sce 1 | Sce 2 | Sce 3 | Sce 4 | Everage (a) |
|----------|-------|-------|-------|-------|-------------|
| Sce 1    | 0.06  | 0.04  | 0.04  | 0.09  | 5.7%        |
| Sce 2    | 0.19  | 0.11  | 0.07  | 0.12  | 12.2%       |
| Sce 3    | 0.31  | 0.32  | 0.22  | 0.20  | 26.3%       |
| Sce 4    | 0.44  | 0.54  | 0.66  | 0.60  | 55.8%       |
|          | 1.00  | 1.00  | 1.00  | 1.00  |             |

| mmult(b) | (a x b) | Lamda | CI    | RI    | CR    |
|----------|---------|-------|-------|-------|-------|
| 0.230    | 4.041   | 4.118 | 0.039 | 0.990 | 0.040 |
| 0.492    | 4.036   |       |       |       |       |
| 1.099    | 4.175   |       |       |       |       |
| 2.356    | 4.222   |       |       |       |       |

#### S16.8 Scenario assessment Pokdarwis Dieng Kulon (Tourism Awareness Group )

|       | C1     | C2     | C3     | C5     | C9     | C13    | Criteria | S16-Scenario Priority |
|-------|--------|--------|--------|--------|--------|--------|----------|-----------------------|
| Sce 1 | 12.80% | 7.43%  | 12.80% | 5.94%  | 25.94% | 5.69%  | 0.0341   | 12.42%                |
| Sce 2 | 55.18% | 13.77% | 52.97% | 27.99% | 55.77% | 12.19% | 0.4188   | 30.28%                |
| Sce 3 | 25.54% | 51.25% | 26.94% | 51.29% | 11.24% | 26.33% | 0.0520   | 36.44%                |
| Sce 4 | 6.49%  | 27.55% | 7.29%  | 14.78% | 7.05%  | 55.79% | 0.1466   | 20.86%                |
|       |        |        |        |        |        |        | 0.2644   |                       |
|       |        |        |        |        |        |        | 0.0841   |                       |

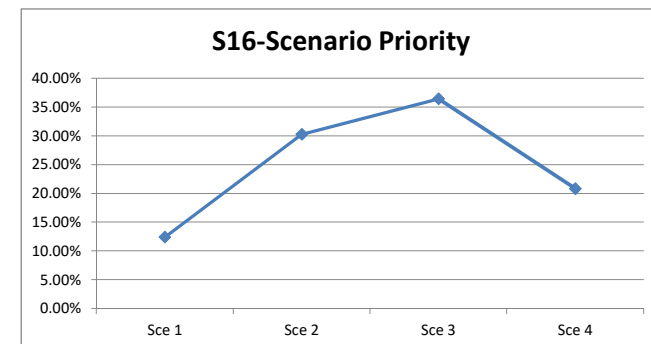

## S17. The homestay association

### S17.1 Criteria assessment by the homestay association

| Criteria | C4    | C1   | C3   | C9   |
|----------|-------|------|------|------|
| C4       | 1.00  | 0.17 | 0.33 | 0.25 |
| C1       | 6.00  | 1.00 | 3.00 | 0.50 |
| C3       | 3.00  | 0.33 | 1.00 | 0.50 |
| C9       | 4.00  | 2.00 | 2.00 | 1.00 |
|          | 14.00 | 3.50 | 6.33 | 2.25 |
|          | 0.00  |      |      |      |

| Criteria | C4   | C1   | C3   | C9   | Everage (a) |
|----------|------|------|------|------|-------------|
| C4       | 0.07 | 0.05 | 0.05 | 0.11 | 0.07        |
| C1       | 0.43 | 0.29 | 0.47 | 0.22 | 0.35        |
| C3       | 0.21 | 0.10 | 0.16 | 0.22 | 0.17        |
| C9       | 0.29 | 0.57 | 0.32 | 0.44 | 0.40        |
|          | 1.00 | 1.00 | 1.00 | 1.00 |             |

| mmult(b) | (a x b) | Lamda | CI    | RI    | CR    |
|----------|---------|-------|-------|-------|-------|
| 0.288    | 4.074   | 4.174 | 0.058 | 0.990 | 0.059 |

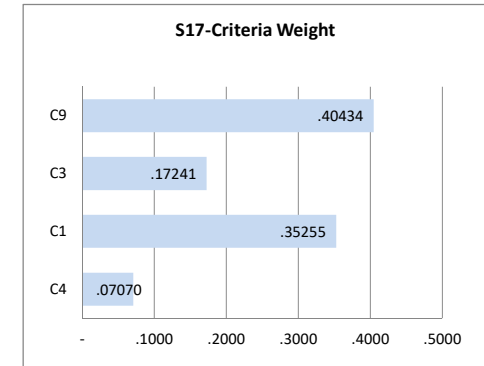

### S17.2 Scenario assessment based on (C4) Various transport System

|       | Sce 1 | Sce 2 | Sce 3 | Sce 4 |
|-------|-------|-------|-------|-------|
| Sce 1 | 1.00  | 0.17  | 0.20  | 0.33  |
| Sce 2 | 6.00  | 1.00  | 3.00  | 4.00  |
| Sce 3 | 5.00  | 0.33  | 1.00  | 2.00  |
| Sce 4 | 3.00  | 0.25  | 0.50  | 1.00  |
|       | 15.00 | 1.75  | 4.70  | 7.33  |

|       | Sce 1 | Sce 2 | Sce 3 | Sce 4 | Everage (a) |
|-------|-------|-------|-------|-------|-------------|
| Sce 1 | 0.07  | 0.10  | 0.04  | 0.05  | 6.2%        |
| Sce 2 | 0.40  | 0.57  | 0.64  | 0.55  | 53.9%       |
| Sce 3 | 0.33  | 0.19  | 0.21  | 0.27  | 25.2%       |
| Sce 4 | 0.20  | 0.14  | 0.11  | 0.14  | 14.6%       |
|       | 1.00  | 1.00  | 1.00  | 1.00  |             |

| mmult(b) | (a x b) | Lamda | CI    | RI    | CR    |
|----------|---------|-------|-------|-------|-------|
| 0.252    | 4.026   | 4.097 | 0.032 | 0.990 | 0.032 |
| 2.256    | 4.188   |       |       |       |       |
| 1.037    | 4.110   |       |       |       |       |
| 0.595    | 4.062   |       |       |       |       |

### S17.3 Scenario assessment based on (C1) Integration Transport System

|       | Sce 1 | Sce 2 | Sce 3 | Sce 4 |
|-------|-------|-------|-------|-------|
| Sce 1 | 1.00  | 3.00  | 5.00  | 7.00  |
| Sce 2 | 0.33  | 1.00  | 3.00  | 4.00  |
| Sce 3 | 0.20  | 0.33  | 1.00  | 2.00  |
| Sce 4 | 0.14  | 0.25  | 0.50  | 1.00  |
|       | 1.68  | 4.58  | 9.50  | 14.00 |

| Scenario | Sce 1 | Sce 2 | Sce 3 | Sce 4 | Everage (a) |
|----------|-------|-------|-------|-------|-------------|
| Sce 1    | 0.60  | 0.65  | 0.53  | 0.50  | 56.9%       |
| Sce 2    | 0.20  | 0.22  | 0.32  | 0.29  | 25.5%       |
| Sce 3    | 0.12  | 0.07  | 0.11  | 0.14  | 11.0%       |
| Sce 4    | 0.09  | 0.05  | 0.05  | 0.07  | 6.6%        |
|          | 1.00  | 1.00  | 1.00  | 1.00  |             |

| mmult(b) | (a x b) | Lamda | CI    | RI    | CR    |
|----------|---------|-------|-------|-------|-------|
| 2.345    | 4.119   | 4.059 | 0.020 | 0.990 | 0.020 |
| 1.038    | 4.078   |       |       |       |       |
| 0.441    | 4.005   |       |       |       |       |
| 0.266    | 4.032   |       |       |       |       |

S17.4 Scenario assessment based on (C3) Accesibility

|       | Sce 1 | Sce 2 | Sce 3 | Sce 4 |
|-------|-------|-------|-------|-------|
| Sce 1 | 1.00  | 3.00  | 5.00  | 7.00  |
| Sce 2 | 0.33  | 1.00  | 3.00  | 4.00  |
| Sce 3 | 0.20  | 0.33  | 1.00  | 2.00  |
| Sce 4 | 0.14  | 0.25  | 0.50  | 1.00  |
|       | 1.68  | 4.58  | 9.50  | 14.00 |

| Scenario | Sce 1 | Sce 2 | Sce 3 | Sce 4 | Everage<br>(a) |
|----------|-------|-------|-------|-------|----------------|
| Sce 1    | 0.60  | 0.65  | 0.53  | 0.50  | 56.9%          |
| Sce 2    | 0.20  | 0.22  | 0.32  | 0.29  | 25.5%          |
| Sce 3    | 0.12  | 0.07  | 0.11  | 0.14  | 11.0%          |
| Sce 4    | 0.09  | 0.05  | 0.05  | 0.07  | 6.6%           |
|          | 1.00  | 1.00  | 1.00  | 1.00  |                |

| mmult(b) | (a x b) | Lamda | CI    | RI    | CR    |
|----------|---------|-------|-------|-------|-------|
| 2.345    | 4.119   | 4.059 | 0.020 | 0.990 | 0.020 |
| 1.038    | 4.078   |       |       |       |       |
| 0.441    | 4.005   |       |       |       |       |
| 0.266    | 4.032   |       |       |       |       |

S17.5 Scenario assessment based on (C9) Supporting local entrepreneurs

|       | Sce 1 | Sce 2 | Sce 3 | Sce 4 |
|-------|-------|-------|-------|-------|
| Sce 1 | 1.00  | 3.00  | 5.00  | 7.00  |
| Sce 2 | 0.33  | 1.00  | 3.00  | 4.00  |
| Sce 3 | 0.20  | 0.33  | 1.00  | 2.00  |
| Sce 4 | 0.14  | 0.25  | 0.50  | 1.00  |
|       | 1.68  | 4.58  | 9.50  | 14.00 |

| Scenario | Sce 1 | Sce 2 | Sce 3 | Sce 4 | Everage<br>(a) |
|----------|-------|-------|-------|-------|----------------|
| Sce 1    | 0.60  | 0.65  | 0.53  | 0.50  | 56.9%          |
| Sce 2    | 0.20  | 0.22  | 0.32  | 0.29  | 25.5%          |
| Sce 3    | 0.12  | 0.07  | 0.11  | 0.14  | 11.0%          |
| Sce 4    | 0.09  | 0.05  | 0.05  | 0.07  | 6.6%           |
|          | 1.00  | 1.00  | 1.00  | 1.00  |                |

| mmult(b) | (a x b) | Lamda | CI    | RI    | CR    |
|----------|---------|-------|-------|-------|-------|
| 2.345    | 4.119   | 4.059 | 0.020 | 0.990 | 0.020 |
| 1.038    | 4.078   |       |       |       |       |
| 0.441    | 4.005   |       |       |       |       |
| 0.266    | 4.032   |       |       |       |       |

S17.6 Scenario assessment by The homestay association (paguyuban Homestay)

|       | C4    | C1    | C3    | C9    | Kriteria | S17-<br>Scenario |
|-------|-------|-------|-------|-------|----------|------------------|
| Sce 1 | 6.2%  | 56.9% | 56.9% | 56.9% | 7%       | 53.35%           |
| Sce 2 | 53.9% | 25.5% | 25.5% | 25.5% | 35%      | 27.47%           |
| Sce 3 | 25.2% | 11.0% | 11.0% | 11.0% | 17%      | 12.01%           |
| Sce 4 | 14.6% | 6.6%  | 6.6%  | 6.6%  | 40%      | 7.16%            |

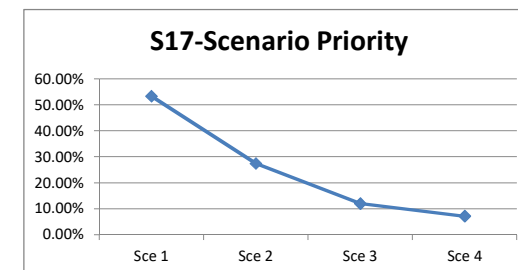



## S18. ASITA (Association of The Indonesian Tours and Travel Agencies)

### S18.1 Criteria assessment by ASITA (Association of The Indonesian Tours and Travel Agencies)

| Criteria | C1    | C4    | C3    | C5   | C2   | C10  |
|----------|-------|-------|-------|------|------|------|
| C1       | 1.00  | 5.00  | 2.00  | 0.25 | 0.20 | 0.50 |
| C4       | 0.20  | 1.00  | 0.33  | 0.17 | 0.13 | 0.17 |
| C3       | 0.50  | 3.00  | 1.00  | 0.20 | 0.14 | 0.20 |
| C5       | 4.00  | 6.00  | 5.00  | 1.00 | 0.50 | 2.00 |
| C2       | 5.00  | 8.00  | 7.00  | 2.00 | 1.00 | 4.00 |
| C10      | 2.00  | 6.00  | 5.00  | 0.50 | 0.25 | 1.00 |
|          | 12.70 | 29.00 | 20.33 | 4.12 | 2.22 | 7.87 |

| Criteria | C1   | C4   | C3   | C5   | C2   | C10  | Everage (a) |
|----------|------|------|------|------|------|------|-------------|
| C1       | 0.08 | 0.17 | 0.10 | 0.06 | 0.09 | 0.06 | 0.09        |
| C4       | 0.02 | 0.03 | 0.02 | 0.04 | 0.06 | 0.02 | 0.03        |
| C3       | 0.04 | 0.10 | 0.05 | 0.05 | 0.06 | 0.03 | 0.06        |
| C5       | 0.31 | 0.21 | 0.25 | 0.24 | 0.23 | 0.25 | 0.25        |
| C2       | 0.39 | 0.28 | 0.34 | 0.49 | 0.45 | 0.51 | 0.41        |
| C10      | 0.16 | 0.21 | 0.25 | 0.12 | 0.11 | 0.13 | 0.16        |
|          | 1.00 | 1.00 | 1.00 | 1.00 | 1.00 | 1.00 | 1.00        |

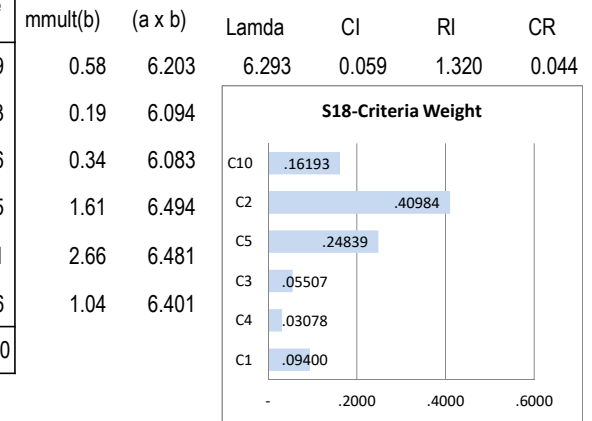

### S18.2 Scenario assessment based on (C1) Integration Transport System

| Scenario | Sce 1 | Sce 2 | Sce 3 | Sce 4 |
|----------|-------|-------|-------|-------|
| Sce 1    | 1.00  | 0.25  | 0.17  | 0.33  |
| Sce 2    | 4.00  | 1.00  | 0.33  | 3.00  |
| Sce 3    | 6.00  | 3.00  | 1.00  | 5.00  |
| Sce 4    | 3.00  | 0.33  | 0.20  | 1.00  |
|          | 14.00 | 4.58  | 1.70  | 9.33  |

| Scenario | Sce 1 | Sce 2 | Sce 3 | Sce 4 | Everage (a) |
|----------|-------|-------|-------|-------|-------------|
| Sce 1    | 0.07  | 0.05  | 0.10  | 0.04  | 6.5%        |
| Sce 2    | 0.29  | 0.22  | 0.20  | 0.32  | 25.5%       |
| Sce 3    | 0.43  | 0.65  | 0.59  | 0.54  | 55.2%       |
| Sce 4    | 0.21  | 0.07  | 0.12  | 0.11  | 12.8%       |
|          | 1.00  | 1.00  | 1.00  | 1.00  | 100.0%      |

|      |       |       |       |       |       |
|------|-------|-------|-------|-------|-------|
| 0.26 | 4.056 | 4.150 | 0.050 | 0.990 | 0.051 |
| 1.08 | 4.241 |       |       |       |       |
| 2.35 | 4.254 |       |       |       |       |
| 0.52 | 4.050 |       |       |       |       |

### S18.3 Scenario assessment based on (C4) Various transport System

| Scenario | Sce 1 | Sce 2 | Sce 3 | Sce 4 |
|----------|-------|-------|-------|-------|
| Sce 1    | 1.00  | 0.33  | 0.20  | 0.14  |
| Sce 2    | 3.00  | 1.00  | 0.33  | 0.20  |
| Sce 3    | 5.00  | 3.00  | 1.00  | 0.50  |
| Sce 4    | 7.00  | 5.00  | 2.00  | 1.00  |
|          | 16.00 | 9.33  | 3.53  | 1.84  |

| Scenario | Sce 1 | Sce 2 | Sce 3 | Sce 4 | Everage (a) |
|----------|-------|-------|-------|-------|-------------|
| Sce 1    | 0.06  | 0.04  | 0.06  | 0.08  | 5.81%       |
| Sce 2    | 0.19  | 0.11  | 0.09  | 0.11  | 12.44%      |
| Sce 3    | 0.31  | 0.32  | 0.28  | 0.27  | 29.71%      |
| Sce 4    | 0.44  | 0.54  | 0.57  | 0.54  | 52.05%      |
|          | 1.00  | 1.00  | 1.00  | 1.00  | 100.00%     |

|      |       |       |       |       |       |
|------|-------|-------|-------|-------|-------|
| 0.23 | 4.017 | 4.070 | 0.023 | 0.990 | 0.023 |
| 0.50 | 4.034 |       |       |       |       |
| 1.22 | 4.110 |       |       |       |       |
| 2.14 | 4.118 |       |       |       |       |

S18.4 Scenario assessment based on (C3) Accesibility

| Scenario | Sce 1 | Sce 2 | Sce 3 | Sce 4 |
|----------|-------|-------|-------|-------|
| Sce 1    | 1.00  | 0.33  | 0.14  | 0.20  |
| Sce 2    | 3.00  | 1.00  | 0.25  | 0.33  |
| Sce 3    | 7.00  | 4.00  | 1.00  | 3.00  |
| Sce 4    | 5.00  | 3.00  | 0.33  | 1.00  |
|          | 16.00 | 8.33  | 1.73  | 4.53  |

| Scenario | Sce 1 | Sce 2 | Sce 3 | Sce 4 | Everage<br>(a) | mmult(b) | (a x b) | Lamda | CI    | RI    | CR    |
|----------|-------|-------|-------|-------|----------------|----------|---------|-------|-------|-------|-------|
| Sce 1    | 0.06  | 0.04  | 0.08  | 0.04  | 5.73%          | 0.23     | 4.056   | 4.119 | 0.040 | 0.990 | 0.040 |
| Sce 2    | 0.19  | 0.12  | 0.14  | 0.07  | 13.15%         | 0.53     | 4.023   |       |       |       |       |
| Sce 3    | 0.44  | 0.48  | 0.58  | 0.66  | 53.96%         | 2.28     | 4.228   |       |       |       |       |
| Sce 4    | 0.31  | 0.36  | 0.19  | 0.22  | 27.15%         | 1.13     | 4.171   |       |       |       |       |
|          | 1.00  | 1.00  | 1.00  | 1.00  | 100.00%        |          |         |       |       |       |       |

S18.5 Scenario assessment based on (C5) Comprehensif Planning

| Scenario | Sce 1 | Sce 2 | Sce 3 | Sce 4 |
|----------|-------|-------|-------|-------|
| Sce 1    | 1.00  | 0.33  | 0.14  | 0.20  |
| Sce 2    | 3.00  | 1.00  | 0.25  | 0.33  |
| Sce 3    | 7.00  | 4.00  | 1.00  | 3.00  |
| Sce 4    | 5.00  | 3.00  | 0.33  | 1.00  |
|          | 16.00 | 8.33  | 1.73  | 4.53  |

| Scenario | Sce 1 | Sce 2 | Sce 3 | Sce 4 | Everage<br>(a) | mmult(b) | (a x b) | Lamda | CI    | RI    | CR    |
|----------|-------|-------|-------|-------|----------------|----------|---------|-------|-------|-------|-------|
| Sce 1    | 0.06  | 0.04  | 0.08  | 0.04  | 5.73%          | 0.23     | 4.056   | 4.119 | 0.040 | 0.990 | 0.040 |
| Sce 2    | 0.19  | 0.12  | 0.14  | 0.07  | 13.15%         | 0.53     | 4.023   |       |       |       |       |
| Sce 3    | 0.44  | 0.48  | 0.58  | 0.66  | 53.96%         | 2.28     | 4.228   |       |       |       |       |
| Sce 4    | 0.31  | 0.36  | 0.19  | 0.22  | 27.15%         | 1.13     | 4.171   |       |       |       |       |
|          | 1.00  | 1.00  | 1.00  | 1.00  | 100.00%        |          |         |       |       |       |       |

S18.6 Scenario assessment based on (C2) Safety and security

| Scenario | Sce 1 | Sce 2 | Sce 3 | Sce 4 |
|----------|-------|-------|-------|-------|
| Sce 1    | 1.00  | 0.33  | 0.20  | 0.14  |
| Sce 2    | 3.00  | 1.00  | 0.33  | 0.20  |
| Sce 3    | 5.00  | 3.00  | 1.00  | 0.33  |
| Sce 4    | 7.00  | 5.00  | 3.00  | 1.00  |
|          | 16.00 | 9.33  | 4.53  | 1.68  |

| Scenario | Sce 1 | Sce 2 | Sce 3 | Sce 4 | Everage (a) | mmult(b) | (a x b) | Lamda | CI    | RI    | CR    |
|----------|-------|-------|-------|-------|-------------|----------|---------|-------|-------|-------|-------|
| Sce 1    | 0.06  | 0.04  | 0.04  | 0.09  | 5.69%       | 0.23     | 4.041   | 4.118 | 0.039 | 0.990 | 0.040 |
| Sce 2    | 0.19  | 0.11  | 0.07  | 0.12  | 12.19%      | 0.49     | 4.036   |       |       |       |       |
| Sce 3    | 0.31  | 0.32  | 0.22  | 0.20  | 26.33%      | 1.10     | 4.175   |       |       |       |       |
| Sce 4    | 0.44  | 0.54  | 0.66  | 0.60  | 55.79%      | 2.36     | 4.222   |       |       |       |       |
|          | 1.00  | 1.00  | 1.00  | 1.00  | 100.00%     |          |         |       |       |       |       |

S18.7 Scenario assessment based on (C10) Visitors experience

| Scenario | Sce 1 | Sce 2 | Sce 3 | Sce 4 |
|----------|-------|-------|-------|-------|
| Sce 1    | 1.00  | 0.33  | 0.20  | 0.13  |
| Sce 2    | 3.00  | 1.00  | 0.33  | 0.20  |
| Sce 3    | 5.00  | 3.00  | 1.00  | 0.33  |
| Sce 4    | 8.00  | 5.00  | 3.00  | 1.00  |
|          | 17.00 | 9.33  | 4.53  | 1.66  |

| Scenario | Sce 1 | Sce 2 | Sce 3 | Sce 4 | Everage (a) | mmult(b) | (a x b) | Lamda | CI    | RI    | CR    |
|----------|-------|-------|-------|-------|-------------|----------|---------|-------|-------|-------|-------|
| Sce 1    | 0.06  | 0.04  | 0.04  | 0.08  | 5.35%       | 0.22     | 4.040   | 4.094 | 0.031 | 0.990 | 0.032 |
| Sce 2    | 0.18  | 0.11  | 0.07  | 0.12  | 11.94%      | 0.48     | 4.018   |       |       |       |       |
| Sce 3    | 0.29  | 0.32  | 0.22  | 0.20  | 25.93%      | 1.07     | 4.144   |       |       |       |       |
| Sce 4    | 0.47  | 0.54  | 0.66  | 0.60  | 56.78%      | 2.37     | 4.176   |       |       |       |       |
|          | 1.00  | 1.00  | 1.00  | 1.00  | 100.00%     |          |         |       |       |       |       |

S18.8 Scenario assessment by ASITA (Association of The Indonesian Tours and Travel Agencies)

|       | C1     | C4     | C3     | C5     | C2     | C10    | Criteria | S18-Scenario Priority |
|-------|--------|--------|--------|--------|--------|--------|----------|-----------------------|
| Sce 1 | 0.0649 | 0.0581 | 0.0573 | 0.0573 | 0.0569 | 0.0535 | 0.094    | 0.057                 |
| Sce 2 | 0.2554 | 0.1244 | 0.1315 | 0.1315 | 0.1219 | 0.1194 | 0.031    | 0.137                 |
| Sce 3 | 0.5518 | 0.2971 | 0.5396 | 0.5396 | 0.2633 | 0.2593 | 0.055    | 0.375                 |
| Sce 4 | 0.1280 | 0.5205 | 0.2715 | 0.2715 | 0.5579 | 0.5678 | 0.248    | 0.431                 |
|       | 1.0000 | 1.0000 | 1.0000 | 1.0000 | 1.0000 | 1.0000 | 0.4098   |                       |
|       |        |        |        |        |        |        | 0.1619   |                       |

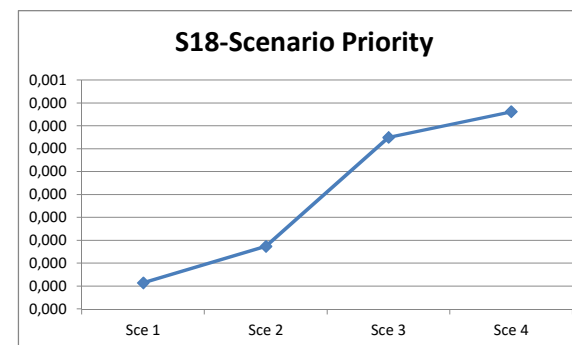

### S19. IPI (Insan Pariwisata Indonesia)

#### S19.1 Criteria assessment by IPI

| Criteria | C1    | C2   | C3    | C5   | C8   |
|----------|-------|------|-------|------|------|
| C1       | 1.00  | 0.17 | 0.33  | 0.14 | 0.25 |
| C2       | 6.00  | 1.00 | 4.00  | 0.50 | 2.00 |
| C3       | 3.00  | 0.25 | 1.00  | 0.20 | 0.50 |
| C5       | 7.00  | 2.00 | 5.00  | 1.00 | 4.00 |
| C8       | 4.00  | 0.50 | 2.00  | 0.25 | 1.00 |
|          | 21.00 | 3.92 | 12.33 | 2.09 | 7.75 |

| Criteria | C1   | C2   | C3   | C5   | C8   | Everage (a) |
|----------|------|------|------|------|------|-------------|
| C1       | 0.05 | 0.04 | 0.03 | 0.07 | 0.03 | 0.04        |
| C2       | 0.29 | 0.26 | 0.32 | 0.24 | 0.26 | 0.27        |
| C3       | 0.14 | 0.06 | 0.08 | 0.10 | 0.06 | 0.09        |
| C5       | 0.33 | 0.51 | 0.41 | 0.48 | 0.52 | 0.45        |
| C8       | 0.19 | 0.13 | 0.16 | 0.12 | 0.13 | 0.15        |
|          | 1.00 | 1.00 | 1.00 | 1.00 | 1.00 |             |

| mmult(b) | (a x b) | Lamda | CI    | RI    | CR    |
|----------|---------|-------|-------|-------|-------|
| 0.219    | 5.037   | 5.112 | 0.028 | 1.188 | 0.024 |

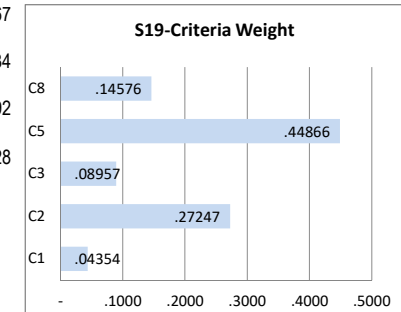

#### S19.2 Scenario assessment based on (C1) Integration Transport System

| Criteria | Sce 1 | Sce 2 | Sce 3 | Sce 4 |
|----------|-------|-------|-------|-------|
| Sce 1    | 1.00  | 0.33  | 0.14  | 0.20  |
| Sce 2    | 3.00  | 1.00  | 0.20  | 0.33  |
| Sce 3    | 7.00  | 5.00  | 1.00  | 3.00  |
| Sce 4    | 5.00  | 3.00  | 0.33  | 1.00  |
|          | 16.00 | 9.33  | 1.68  | 4.53  |

| Criteria | Sce 1 | Sce 2 | Sce 3 | Sce 4 | Everage (a) |
|----------|-------|-------|-------|-------|-------------|
| Sce 1    | 0.06  | 0.04  | 0.09  | 0.04  | 5.7%        |
| Sce 2    | 0.19  | 0.11  | 0.12  | 0.07  | 12.2%       |
| Sce 3    | 0.44  | 0.54  | 0.60  | 0.66  | 55.8%       |
| Sce 4    | 0.31  | 0.32  | 0.20  | 0.22  | 26.3%       |
|          | 1.00  | 1.00  | 1.00  | 1.00  |             |

| mmult(b) | (a x b) | Lamda | CI    | RI    | CR    |
|----------|---------|-------|-------|-------|-------|
| 0.230    | 4.041   | 4.118 | 0.039 | 0.990 | 0.040 |
| 0.492    | 4.036   |       |       |       |       |
| 2.356    | 4.222   |       |       |       |       |
| 1.099    | 4.175   |       |       |       |       |

#### S19.3 Scenario assessment based on (C2) Safety and security

| Criteria | Sce 1 | Sce 2 | Sce 3 | Sce 4 |
|----------|-------|-------|-------|-------|
| Sce 1    | 1.00  | 0.33  | 0.14  | 0.20  |
| Sce 2    | 3.00  | 1.00  | 0.20  | 0.33  |
| Sce 3    | 7.00  | 5.00  | 1.00  | 3.00  |
| Sce 4    | 5.00  | 3.00  | 0.33  | 1.00  |
|          | 16.00 | 9.33  | 1.68  | 4.53  |

| Criteria | Sce 1 | Sce 2 | Sce 3 | Sce 4 | Everage (a) |
|----------|-------|-------|-------|-------|-------------|
| Sce 1    | 0.06  | 0.04  | 0.09  | 0.04  | 5.7%        |
| Sce 2    | 0.19  | 0.11  | 0.12  | 0.07  | 12.2%       |
| Sce 3    | 0.44  | 0.54  | 0.60  | 0.66  | 55.8%       |
| Sce 4    | 0.31  | 0.32  | 0.20  | 0.22  | 26.3%       |
|          | 1.00  | 1.00  | 1.00  | 1.00  |             |

| mmult(b) | (a x b) | Lamda | CI   | RI   | CR   |
|----------|---------|-------|------|------|------|
| 0.230    | 4.04    | 4.12  | 0.04 | 0.99 | 0.04 |
| 0.492    | 4.04    |       |      |      |      |
| 2.356    | 4.22    |       |      |      |      |
| 1.099    | 4.17    |       |      |      |      |

S19.4 Scenario assessment based on (C3) Accesibility

| Criteria | Sce 1 | Sce 2 | Sce 3 | Sce 4 |
|----------|-------|-------|-------|-------|
| Sce 1    | 1.00  | 0.33  | 0.25  | 3.00  |
| Sce 2    | 3.00  | 1.00  | 0.50  | 5.00  |
| Sce 3    | 4.00  | 2.00  | 1.00  | 7.00  |
| Sce 4    | 0.33  | 0.20  | 0.14  | 1.00  |
|          | 8.33  | 3.53  | 1.89  | 16.00 |

| Criteria | Sce 1 | Sce 2 | Sce 3 | Sce 4 | Everage (a) |
|----------|-------|-------|-------|-------|-------------|
| Sce 1    | 0.12  | 0.09  | 0.13  | 0.19  | 13.3%       |
| Sce 2    | 0.36  | 0.28  | 0.26  | 0.31  | 30.5%       |
| Sce 3    | 0.48  | 0.57  | 0.53  | 0.44  | 50.3%       |
| Sce 4    | 0.04  | 0.06  | 0.08  | 0.06  | 5.9%        |
|          | 1.00  | 1.00  | 1.00  | 1.00  |             |

| mmult(b) | (a x b) | Lamda | CI   | RI   | CR   |
|----------|---------|-------|------|------|------|
| 0.537    | 4.02    | 4.06  | 0.02 | 0.99 | 0.02 |
| 1.250    | 4.10    |       |      |      |      |
| 2.057    | 4.09    |       |      |      |      |
| 0.236    | 4.02    |       |      |      |      |

S19.5 Scenario assessment based on (C5) Comprehensif Planning

| Criteria | Sce 1 | Sce 2 | Sce 3 | Sce 4 |
|----------|-------|-------|-------|-------|
| Sce 1    | 1.00  | 0.33  | 0.17  | 0.14  |
| Sce 2    | 3.00  | 1.00  | 0.33  | 0.25  |
| Sce 3    | 6.00  | 3.00  | 1.00  | 0.50  |
| Sce 4    | 7.00  | 4.00  | 2.00  | 1.00  |
|          | 17.00 | 8.33  | 3.50  | 1.89  |

| Criteria | Sce 1 | Sce 2 | Sce 3 | Sce 4 | Everage (a) |
|----------|-------|-------|-------|-------|-------------|
| Sce 1    | 0.06  | 0.04  | 0.05  | 0.08  | 5.5%        |
| Sce 2    | 0.18  | 0.12  | 0.10  | 0.13  | 13.1%       |
| Sce 3    | 0.35  | 0.36  | 0.29  | 0.26  | 31.6%       |
| Sce 4    | 0.41  | 0.48  | 0.57  | 0.53  | 49.8%       |
|          | 1.00  | 1.00  | 1.00  | 1.00  |             |

| mmult(b) | (a x b) | Lamda | CI   | RI   | CR   |
|----------|---------|-------|------|------|------|
| 0.223    | 4.02    | 4.06  | 0.02 | 0.99 | 0.02 |
| 0.527    | 4.03    |       |      |      |      |
| 1.290    | 4.09    |       |      |      |      |
| 2.041    | 4.10    |       |      |      |      |

S19.6 Scenario assessment based on (C8) Visitor management

| Criteria | Sce 1 | Sce 2 | Sce 3 | Sce 4 |
|----------|-------|-------|-------|-------|
| Sce 1    | 1.00  | 0.50  | 0.25  | 0.17  |
| Sce 2    | 2.00  | 1.00  | 0.50  | 0.25  |
| Sce 3    | 4.00  | 2.00  | 1.00  | 0.50  |
| Sce 4    | 6.00  | 4.00  | 2.00  | 1.00  |
|          | 13.00 | 7.50  | 3.75  | 1.92  |

| Criteria | Sce 1 | Sce 2 | Sce 3 | Sce 4 | Everage (a) |
|----------|-------|-------|-------|-------|-------------|
| Sce 1    | 0.08  | 0.07  | 0.07  | 0.09  | 7.4%        |
| Sce 2    | 0.15  | 0.13  | 0.13  | 0.13  | 13.8%       |
| Sce 3    | 0.31  | 0.27  | 0.27  | 0.26  | 27.5%       |
| Sce 4    | 0.46  | 0.53  | 0.53  | 0.52  | 51.2%       |
|          | 1.00  | 1.00  | 1.00  | 1.00  |             |

| mmult(b) | (a x b) | Lamda | CI    | RI    | CR    |
|----------|---------|-------|-------|-------|-------|
| 0.297    | 4.003   | 4.010 | 0.003 | 0.990 | 0.003 |
| 0.552    | 4.009   |       |       |       |       |
| 1.104    | 4.009   |       |       |       |       |
| 2.060    | 4.020   |       |       |       |       |

S19.7 Scenario assessment by IPI

| Criteria | C1     | C2     | C3     | C5     | C8     | Criteria | S19-Scenario |
|----------|--------|--------|--------|--------|--------|----------|--------------|
| Sce 1    | 0.0569 | 0.0569 | 0.1335 | 0.0555 | 0.0743 | 0.0435   | 6.57%        |
| Sce 2    | 0.1219 | 0.1219 | 0.3049 | 0.1309 | 0.1377 | 0.2725   | 14.47%       |
| Sce 3    | 0.5579 | 0.5579 | 0.5030 | 0.3157 | 0.2755 | 0.0896   | 40.31%       |
| Sce 4    | 0.2633 | 0.2633 | 0.0586 | 0.4979 | 0.5125 | 0.4487   | 38.65%       |
|          |        |        |        |        |        | 0.1458   |              |

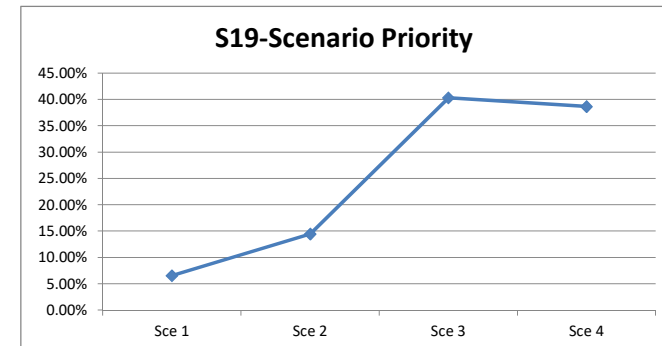

## S20. ASPPI

### S20.1 Criteria assessment by ASPPI

| Criteria | C4    | C1   | C5   | C8   |
|----------|-------|------|------|------|
| C4       | 1.00  | 0.20 | 0.33 | 0.14 |
| C1       | 5.00  | 1.00 | 3.00 | 0.33 |
| C5       | 3.00  | 0.33 | 1.00 | 0.20 |
| C8       | 7.00  | 3.00 | 5.00 | 1.00 |
|          | 16.00 | 4.53 | 9.33 | 1.68 |

| Criteria | C4   | C1   | C5   | C8   | Everage (a) |
|----------|------|------|------|------|-------------|
| C4       | 0.06 | 0.04 | 0.04 | 0.09 | 0.06        |
| C1       | 0.31 | 0.22 | 0.32 | 0.20 | 0.26        |
| C5       | 0.19 | 0.07 | 0.11 | 0.12 | 0.12        |
| C8       | 0.44 | 0.66 | 0.54 | 0.60 | 0.56        |
|          | 1.00 | 1.00 | 1.00 | 1.00 |             |

| mmult(b) | (a x b) | Lamda | CI    | RI    | CR    |
|----------|---------|-------|-------|-------|-------|
| 0.2299   | 4.041   | 4.118 | 0.039 | 0.990 | 0.040 |

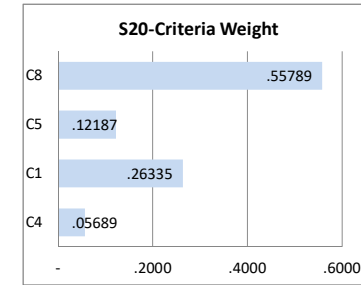

### S20.2 Scenario assessment based on (C4) Various transport System

| Scenario | Sce 1 | Sce 2 | Sce 3 | Sce 4 |
|----------|-------|-------|-------|-------|
| Sce 1    | 1.00  | 0.20  | 0.14  | 0.33  |
| Sce 2    | 5.00  | 1.00  | 0.33  | 2.00  |
| Sce 3    | 7.00  | 3.00  | 1.00  | 4.00  |
| Sce 4    | 3.00  | 0.50  | 0.25  | 1.00  |
|          | 16.00 | 4.70  | 1.73  | 7.33  |

|       | Sce 1 | Sce 2 | Sce 3 | Sce 4 | Everage (a) |
|-------|-------|-------|-------|-------|-------------|
| Sce 1 | 0.06  | 0.04  | 0.08  | 0.05  | 5.8%        |
| Sce 2 | 0.31  | 0.21  | 0.19  | 0.27  | 24.8%       |
| Sce 3 | 0.44  | 0.64  | 0.58  | 0.55  | 55.0%       |
| Sce 4 | 0.19  | 0.11  | 0.14  | 0.14  | 14.4%       |
|       | 1.00  | 1.00  | 1.00  | 1.00  |             |

| mmult(b) | (a x b) | Lamda | CI    | RI    | CR    |
|----------|---------|-------|-------|-------|-------|
| 0.2344   | 4.019   | 4.068 | 0.023 | 0.990 | 0.023 |
| 1.0103   | 4.077   |       |       |       |       |
| 2.2768   | 4.138   |       |       |       |       |
| 0.5801   | 4.035   |       |       |       |       |

### S20.3 Scenario assessment based on (C1) Integration Transport System

|       | Sce 1 | Sce 2 | Sce 3 | Sce 4 |
|-------|-------|-------|-------|-------|
| Sce 1 | 1.00  | 0.33  | 0.14  | 0.20  |
| Sce 2 | 3.00  | 1.00  | 0.25  | 0.33  |
| Sce 3 | 7.00  | 4.00  | 1.00  | 3.00  |
| Sce 4 | 5.00  | 3.00  | 0.33  | 1.00  |
|       | 16.00 | 8.33  | 1.73  | 4.53  |

|       | Sce 1 | Sce 2 | Sce 3 | Sce 4 | Everage (a) |
|-------|-------|-------|-------|-------|-------------|
| Sce 1 | 0.06  | 0.04  | 0.08  | 0.04  | 5.7%        |
| Sce 2 | 0.19  | 0.12  | 0.14  | 0.07  | 13.1%       |
| Sce 3 | 0.44  | 0.48  | 0.58  | 0.66  | 54.0%       |
| Sce 4 | 0.31  | 0.36  | 0.19  | 0.22  | 27.2%       |
|       | 1.00  | 1.00  | 1.00  | 1.00  |             |

| mmult(b) | (a x b) | Lamda | CI    | RI    | CR    |
|----------|---------|-------|-------|-------|-------|
| 0.2326   | 4.056   | 4.119 | 0.040 | 0.990 | 0.040 |
| 0.5289   | 4.023   |       |       |       |       |
| 2.2816   | 4.228   |       |       |       |       |
| 1.1325   | 4.171   |       |       |       |       |

S20.4 Scenario assessment based on (C5) Comprehensive Planning

| Sce 1 | Sce 2 | Sce 3 | Sce 4 |      | Sce 1 | Sce 2 | Sce 3 | Sce 4 | Everage<br>(a) | mmult(b) | (a x b) | Lamda | CI    | RI    | CR    |       |
|-------|-------|-------|-------|------|-------|-------|-------|-------|----------------|----------|---------|-------|-------|-------|-------|-------|
| Sce 1 | 1.00  | 0.50  | 0.25  | 0.14 | Sce 1 | 0.07  | 0.05  | 0.05  | 0.09           | 6.6%     | 0.2660  | 4.032 | 4.059 | 0.020 | 0.990 | 0.020 |
| Sce 2 | 2.00  | 1.00  | 0.33  | 0.20 | Sce 2 | 0.14  | 0.11  | 0.07  | 0.12           | 11.0%    | 0.4407  | 4.005 |       |       |       |       |
| Sce 3 | 4.00  | 3.00  | 1.00  | 0.33 | Sce 3 | 0.29  | 0.32  | 0.22  | 0.20           | 25.5%    | 1.0384  | 4.078 |       |       |       |       |
| Sce 4 | 7.00  | 5.00  | 3.00  | 1.00 | Sce 4 | 0.50  | 0.53  | 0.65  | 0.60           | 56.9%    | 2.3452  | 4.119 |       |       |       |       |
| 14.00 | 9.50  | 4.58  | 1.68  |      | 1.00  | 1.00  | 1.00  | 1.00  |                |          |         |       |       |       |       |       |

S20.5 Scenario assessment based on (C8) Visitor management

|       |       |       |       |       | b |       |       |       |                |      | mmult(b) | (a x b) | Lamda | CI | RI | CR |       |
|-------|-------|-------|-------|-------|---|-------|-------|-------|----------------|------|----------|---------|-------|----|----|----|-------|
| Sce 1 | Sce 2 | Sce 3 | Sce 4 | Sce 1 |   | Sce 2 | Sce 3 | Sce 4 | Everage<br>(a) |      |          |         |       |    |    |    |       |
| Sce 1 | 1.00  | 0.50  | 0.14  | 0.20  |   | Sce 1 | 0.07  | 0.06  | 0.08           | 0.04 |          |         |       |    |    |    | 6.3%  |
| Sce 2 | 2.00  | 1.00  | 0.25  | 0.33  |   | Sce 2 | 0.13  | 0.12  | 0.14           | 0.07 |          |         |       |    |    |    | 11.7% |
| Sce 3 | 7.00  | 4.00  | 1.00  | 3.00  |   | Sce 3 | 0.47  | 0.47  | 0.58           | 0.66 |          |         |       |    |    |    | 54.5% |
| Sce 4 | 5.00  | 3.00  | 0.33  | 1.00  |   | Sce 4 | 0.33  | 0.35  | 0.19           | 0.22 |          |         |       |    |    |    | 27.5% |
| 15.00 | 8.50  | 1.73  | 4.53  | 1.00  |   | 1.00  | 1.00  | 1.00  | 1.00           |      |          |         |       |    |    |    |       |



S20.6 Scenario assessment by ASPPI

|       | C4     | C1     | C5     | C8     | Criteria | S20-<br>Scenario |
|-------|--------|--------|--------|--------|----------|------------------|
| Sce 1 | 0.0583 | 0.0573 | 0.0660 | 0.0631 | 0.0569   | 6.2%             |
| Sce 2 | 0.2478 | 0.1315 | 0.1100 | 0.1173 | 0.2633   | 12.8%            |
| Sce 3 | 0.5501 | 0.5396 | 0.2546 | 0.5446 | 0.1219   | 50.8%            |
| Sce 4 | 0.1438 | 0.2715 | 0.5694 | 0.2750 | 0.5579   | 30.2%            |

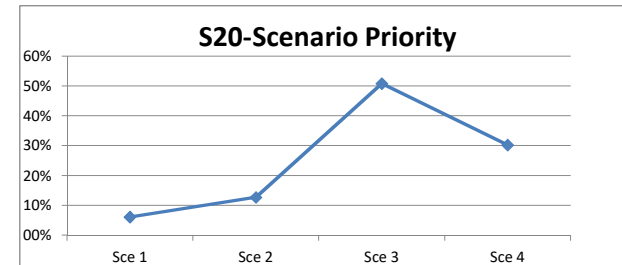

## S21. Stakeholder Weight

### S21.1 Cultural Heritage Conservation Center of Central Java

| RANK | STAKEHOLDER | National | Central Java Province |       |       |       |       | Wonosobo Regency |       |       |       | Banjarnegara Regency |       |       |       | Local Community |       |       | User/Tourist |       |       | Everage |
|------|-------------|----------|-----------------------|-------|-------|-------|-------|------------------|-------|-------|-------|----------------------|-------|-------|-------|-----------------|-------|-------|--------------|-------|-------|---------|
|      |             | S2       | S3                    | S4    | S5    | S6    | S7    | S8               | S9    | S10   | S11   | S12                  | S13   | S14   | S15   | S16             | S17   | S18   | S19          | S20   |       |         |
| 13   | S2          | 0.021    | 0.018                 | 0.020 | 0.020 | 0.034 | 0.029 | 0.018            | 0.022 | 0.020 | 0.017 | 0.022                | 0.024 | 0.018 | 0.018 | 0.028           | 0.034 | 0.027 | 0.016        | 0.027 | 2.3%  |         |
| 7    | S3          | 0.064    | 0.054                 | 0.049 | 0.080 | 0.067 | 0.058 | 0.072            | 0.054 | 0.039 | 0.067 | 0.044                | 0.048 | 0.054 | 0.037 | 0.055           | 0.068 | 0.068 | 0.066        | 0.067 | 5.8%  |         |
| 4    | S4          | 0.107    | 0.108                 | 0.098 | 0.080 | 0.090 | 0.115 | 0.072            | 0.108 | 0.117 | 0.101 | 0.133                | 0.072 | 0.108 | 0.111 | 0.111           | 0.091 | 0.095 | 0.098        | 0.093 | 10.0% |         |
| 5    | S5          | 0.086    | 0.054                 | 0.098 | 0.080 | 0.079 | 0.087 | 0.144            | 0.108 | 0.078 | 0.084 | 0.067                | 0.072 | 0.054 | 0.074 | 0.083           | 0.080 | 0.082 | 0.082        | 0.080 | 8.3%  |         |
| 19   | S6          | 0.007    | 0.009                 | 0.012 | 0.011 | 0.011 | 0.007 | 0.010            | 0.014 | 0.008 | 0.008 | 0.015                | 0.016 | 0.009 | 0.007 | 0.007           | 0.011 | 0.014 | 0.008        | 0.013 | 1.0%  |         |
| 11   | S7          | 0.021    | 0.027                 | 0.024 | 0.027 | 0.045 | 0.029 | 0.024            | 0.027 | 0.039 | 0.034 | 0.027                | 0.029 | 0.027 | 0.037 | 0.055           | 0.045 | 0.041 | 0.033        | 0.040 | 3.3%  |         |
| 6    | S8          | 0.086    | 0.054                 | 0.098 | 0.040 | 0.079 | 0.087 | 0.072            | 0.108 | 0.078 | 0.084 | 0.067                | 0.072 | 0.054 | 0.074 | 0.083           | 0.080 | 0.082 | 0.082        | 0.080 | 7.7%  |         |
| 3    | S9          | 0.107    | 0.108                 | 0.098 | 0.080 | 0.090 | 0.115 | 0.072            | 0.108 | 0.117 | 0.101 | 0.133                | 0.143 | 0.108 | 0.111 | 0.111           | 0.091 | 0.095 | 0.098        | 0.093 | 10.4% |         |
| 9    | S10         | 0.043    | 0.054                 | 0.033 | 0.040 | 0.056 | 0.029 | 0.036            | 0.036 | 0.039 | 0.050 | 0.033                | 0.036 | 0.054 | 0.074 | 0.028           | 0.057 | 0.054 | 0.049        | 0.053 | 4.5%  |         |
| 14   | S11         | 0.021    | 0.013                 | 0.016 | 0.016 | 0.022 | 0.014 | 0.014            | 0.018 | 0.013 | 0.017 | 0.019                | 0.020 | 0.013 | 0.012 | 0.014           | 0.023 | 0.014 | 0.033        | 0.013 | 1.7%  |         |
| 2    | S12         | 0.129    | 0.162                 | 0.098 | 0.161 | 0.101 | 0.144 | 0.144            | 0.108 | 0.156 | 0.118 | 0.133                | 0.143 | 0.161 | 0.148 | 0.138           | 0.102 | 0.109 | 0.115        | 0.107 | 13.0% |         |
| 1    | S13         | 0.129    | 0.162                 | 0.195 | 0.161 | 0.101 | 0.144 | 0.144            | 0.108 | 0.156 | 0.118 | 0.133                | 0.143 | 0.161 | 0.148 | 0.138           | 0.102 | 0.109 | 0.115        | 0.107 | 13.5% |         |
| 8    | S14         | 0.064    | 0.054                 | 0.049 | 0.080 | 0.067 | 0.058 | 0.072            | 0.054 | 0.039 | 0.067 | 0.044                | 0.048 | 0.054 | 0.037 | 0.055           | 0.057 | 0.068 | 0.066        | 0.067 | 5.8%  |         |
| 10   | S15         | 0.043    | 0.054                 | 0.033 | 0.040 | 0.056 | 0.029 | 0.036            | 0.036 | 0.020 | 0.050 | 0.033                | 0.036 | 0.054 | 0.037 | 0.028           | 0.057 | 0.054 | 0.049        | 0.053 | 4.2%  |         |
| 12   | S16         | 0.021    | 0.027                 | 0.024 | 0.027 | 0.045 | 0.014 | 0.024            | 0.027 | 0.039 | 0.034 | 0.027                | 0.029 | 0.027 | 0.037 | 0.028           | 0.045 | 0.041 | 0.033        | 0.040 | 3.1%  |         |
| 18   | S17         | 0.007    | 0.009                 | 0.012 | 0.011 | 0.011 | 0.007 | 0.010            | 0.014 | 0.008 | 0.008 | 0.015                | 0.016 | 0.011 | 0.007 | 0.007           | 0.011 | 0.014 | 0.008        | 0.013 | 1.1%  |         |
| 16   | S18         | 0.011    | 0.011                 | 0.014 | 0.013 | 0.011 | 0.010 | 0.012            | 0.015 | 0.010 | 0.017 | 0.017                | 0.018 | 0.011 | 0.009 | 0.009           | 0.011 | 0.014 | 0.016        | 0.027 | 1.3%  |         |
| 15   | S19         | 0.021    | 0.013                 | 0.016 | 0.016 | 0.022 | 0.014 | 0.014            | 0.018 | 0.013 | 0.008 | 0.019                | 0.020 | 0.013 | 0.012 | 0.014           | 0.023 | 0.014 | 0.016        | 0.013 | 1.6%  |         |
| 17   | S20         | 0.011    | 0.011                 | 0.014 | 0.013 | 0.011 | 0.010 | 0.012            | 0.015 | 0.010 | 0.017 | 0.017                | 0.018 | 0.011 | 0.009 | 0.009           | 0.011 | 0.007 | 0.016        | 0.013 | 1.2%  |         |
|      |             | 1.00     | 1.00                  | 1.00  | 1.00  | 1.00  | 1.00  | 1.00             | 1.00  | 1.00  | 1.00  | 1.00                 | 1.00  | 1.00  | 1.00  | 1.00            | 1.00  | 1.00  | 1.00         | 1.00  | 1.00  |         |

## S21.2 Natural Resources Conservation Center of Central Java

| RANK | STAKEHOLDER | National | Central Java Province |       |       |       | Wonosobo Regency |       |       |       | Banjarnegara Regency |       |       |       | Local Community |       |       | User/Tourist |       |       | Everage |
|------|-------------|----------|-----------------------|-------|-------|-------|------------------|-------|-------|-------|----------------------|-------|-------|-------|-----------------|-------|-------|--------------|-------|-------|---------|
|      |             | S1       | S3                    | S4    | S5    | S6    | S7               | S8    | S9    | S10   | S11                  | S12   | S13   | S14   | S15             | S16   | S17   | S18          | S19   | S20   |         |
| 18   | S1          | 0.012    | 0.013                 | 0.019 | 0.008 | 0.014 | 0.011            | 0.009 | 0.008 | 0.010 | 0.012                | 0.013 | 0.009 | 0.016 | 0.009           | 0.010 | 0.010 | 0.009        | 0.010 | 0.030 | 1.2%    |
| 5    | S3          | 0.075    | 0.078                 | 0.077 | 0.078 | 0.100 | 0.065            | 0.087 | 0.101 | 0.063 | 0.074                | 0.089 | 0.069 | 0.063 | 0.071           | 0.079 | 0.097 | 0.078        | 0.077 | 0.076 | 7.9%    |
| 1    | S4          | 0.099    | 0.156                 | 0.153 | 0.109 | 0.200 | 0.195            | 0.173 | 0.126 | 0.189 | 0.099                | 0.179 | 0.137 | 0.126 | 0.142           | 0.119 | 0.146 | 0.129        | 0.115 | 0.106 | 14.2%   |
| 16   | S5          | 0.025    | 0.016                 | 0.022 | 0.016 | 0.017 | 0.013            | 0.011 | 0.013 | 0.013 | 0.025                | 0.015 | 0.011 | 0.018 | 0.012           | 0.020 | 0.012 | 0.013        | 0.019 | 0.015 | 1.6%    |
| 3    | S6          | 0.087    | 0.078                 | 0.077 | 0.094 | 0.100 | 0.130            | 0.130 | 0.101 | 0.126 | 0.086                | 0.089 | 0.103 | 0.126 | 0.107           | 0.099 | 0.097 | 0.103        | 0.096 | 0.091 | 10.1%   |
| 6    | S7          | 0.075    | 0.078                 | 0.051 | 0.078 | 0.050 | 0.065            | 0.087 | 0.076 | 0.063 | 0.074                | 0.089 | 0.069 | 0.063 | 0.071           | 0.079 | 0.049 | 0.078        | 0.077 | 0.076 | 7.1%    |
| 9    | S8          | 0.062    | 0.039                 | 0.038 | 0.063 | 0.033 | 0.032            | 0.043 | 0.050 | 0.063 | 0.062                | 0.045 | 0.069 | 0.042 | 0.036           | 0.059 | 0.049 | 0.052        | 0.058 | 0.061 | 5.0%    |
| 13   | S9          | 0.037    | 0.020                 | 0.031 | 0.031 | 0.025 | 0.022            | 0.022 | 0.025 | 0.021 | 0.037                | 0.022 | 0.034 | 0.025 | 0.036           | 0.020 | 0.024 | 0.026        | 0.019 | 0.030 | 2.7%    |
| 7    | S10         | 0.075    | 0.078                 | 0.051 | 0.078 | 0.050 | 0.065            | 0.043 | 0.076 | 0.063 | 0.074                | 0.089 | 0.069 | 0.063 | 0.071           | 0.079 | 0.049 | 0.078        | 0.077 | 0.076 | 6.9%    |
| 19   | S11         | 0.012    | 0.013                 | 0.019 | 0.008 | 0.014 | 0.011            | 0.009 | 0.008 | 0.010 | 0.012                | 0.013 | 0.009 | 0.016 | 0.009           | 0.010 | 0.010 | 0.009        | 0.010 | 0.015 | 1.1%    |
| 4    | S12         | 0.087    | 0.078                 | 0.077 | 0.094 | 0.100 | 0.065            | 0.087 | 0.101 | 0.063 | 0.086                | 0.089 | 0.103 | 0.126 | 0.107           | 0.099 | 0.097 | 0.103        | 0.096 | 0.091 | 9.2%    |
| 11   | S13         | 0.050    | 0.039                 | 0.038 | 0.047 | 0.033 | 0.032            | 0.022 | 0.025 | 0.031 | 0.049                | 0.030 | 0.034 | 0.032 | 0.036           | 0.040 | 0.049 | 0.026        | 0.038 | 0.045 | 3.7%    |
| 2    | S14         | 0.099    | 0.156                 | 0.153 | 0.109 | 0.100 | 0.130            | 0.130 | 0.126 | 0.126 | 0.099                | 0.089 | 0.137 | 0.126 | 0.142           | 0.119 | 0.146 | 0.129        | 0.115 | 0.106 | 12.3%   |
| 10   | S15         | 0.050    | 0.039                 | 0.038 | 0.047 | 0.033 | 0.032            | 0.043 | 0.025 | 0.031 | 0.049                | 0.030 | 0.034 | 0.032 | 0.036           | 0.040 | 0.049 | 0.026        | 0.038 | 0.045 | 3.8%    |
| 14   | S16         | 0.025    | 0.020                 | 0.026 | 0.016 | 0.020 | 0.016            | 0.014 | 0.025 | 0.016 | 0.025                | 0.018 | 0.017 | 0.021 | 0.018           | 0.020 | 0.016 | 0.026        | 0.038 | 0.015 | 2.1%    |
| 8    | S17         | 0.062    | 0.039                 | 0.051 | 0.063 | 0.050 | 0.065            | 0.043 | 0.050 | 0.063 | 0.062                | 0.045 | 0.034 | 0.042 | 0.036           | 0.059 | 0.049 | 0.052        | 0.058 | 0.061 | 5.2%    |
| 12   | S18         | 0.037    | 0.026                 | 0.031 | 0.031 | 0.025 | 0.022            | 0.022 | 0.025 | 0.021 | 0.037                | 0.022 | 0.034 | 0.025 | 0.036           | 0.020 | 0.024 | 0.026        | 0.019 | 0.030 | 2.7%    |
| 15   | S19         | 0.025    | 0.020                 | 0.026 | 0.016 | 0.020 | 0.016            | 0.014 | 0.025 | 0.016 | 0.025                | 0.018 | 0.017 | 0.021 | 0.018           | 0.010 | 0.016 | 0.026        | 0.019 | 0.015 | 1.9%    |
| 17   | S20         | 0.006    | 0.016                 | 0.022 | 0.016 | 0.017 | 0.013            | 0.011 | 0.013 | 0.013 | 0.012                | 0.015 | 0.011 | 0.018 | 0.012           | 0.020 | 0.012 | 0.013        | 0.019 | 0.015 | 1.4%    |
|      |             | 1        | 1                     | 1     | 1     | 1     | 1                | 1     | 1     | 1     | 1                    | 1     | 1     | 1     | 1               | 1     | 1     | 1            | 1     | 1     | 1       |

### S21.3 Regional Development Planning Agency of Central Java Province

| RANK | STAKEHOLDER | National |        | Central Java Province |        |        | Wonosobo Regency |       |       |       | Banjarnegara Regency |       |       |        | Local Community |       |       | User/Tourist |       |       | Everage |
|------|-------------|----------|--------|-----------------------|--------|--------|------------------|-------|-------|-------|----------------------|-------|-------|--------|-----------------|-------|-------|--------------|-------|-------|---------|
|      |             | S1       | S2     | S4                    | S5     | S6     | S7               | S8    | S9    | S10   | S11                  | S12   | S13   | S14    | S15             | S16   | S17   | S18          | S19   | S20   |         |
| 12   | S1          | 0.02459  | 0.0219 | 0.0227                | 0.0233 | 0.019  | 0.0191           | 0.034 | 0.029 | 0.022 | 0.02                 | 0.037 | 0.02  | 0.0214 | 0.0357          | 0.035 | 0.028 | 0.018        | 0.017 | 0.028 | 2.5%    |
| 13   | S2          | 0.02459  | 0.0219 | 0.0227                | 0.0233 | 0.019  | 0.0191           | 0.022 | 0.029 | 0.022 | 0.02                 | 0.022 | 0.013 | 0.0214 | 0.0357          | 0.035 | 0.028 | 0.018        | 0.017 | 0.028 | 2.3%    |
| 1    | S4          | 0.14754  | 0.1314 | 0.1359                | 0.1165 | 0.1517 | 0.1715           | 0.135 | 0.146 | 0.111 | 0.156                | 0.11  | 0.157 | 0.1711 | 0.0833          | 0.105 | 0.113 | 0.125        | 0.121 | 0.111 | 13.2%   |
| 10   | S5          | 0.02459  | 0.0219 | 0.0272                | 0.0233 | 0.0253 | 0.0052           | 0.027 | 0.029 | 0.028 | 0.039                | 0.028 | 0.039 | 0.0285 | 0.0476          | 0.047 | 0.042 | 0.036        | 0.052 | 0.056 | 3.3%    |
| 6    | S6          | 0.09836  | 0.0876 | 0.068                 | 0.0699 | 0.0758 | 0.0572           | 0.067 | 0.088 | 0.111 | 0.078                | 0.11  | 0.079 | 0.0428 | 0.0833          | 0.081 | 0.085 | 0.089        | 0.086 | 0.083 | 8.1%    |
| 7    | S7          | 0.07377  | 0.0657 | 0.0453                | 0.2563 | 0.0758 | 0.0572           | 0.045 | 0.059 | 0.056 | 0.039                | 0.055 | 0.039 | 0.0856 | 0.0714          | 0.07  | 0.07  | 0.071        | 0.069 | 0.069 | 7.2%    |
| 2    | S8          | 0.09836  | 0.1314 | 0.1359                | 0.1165 | 0.1517 | 0.1715           | 0.135 | 0.146 | 0.111 | 0.156                | 0.11  | 0.157 | 0.1711 | 0.1071          | 0.105 | 0.113 | 0.125        | 0.121 | 0.111 | 13.0%   |
| 11   | S9          | 0.02459  | 0.0219 | 0.0272                | 0.0233 | 0.0253 | 0.0286           | 0.027 | 0.029 | 0.028 | 0.039                | 0.028 | 0.039 | 0.0285 | 0.0476          | 0.047 | 0.042 | 0.036        | 0.034 | 0.042 | 3.3%    |
| 3    | S10         | 0.12295  | 0.1095 | 0.1359                | 0.0932 | 0.0758 | 0.1143           | 0.135 | 0.117 | 0.111 | 0.117                | 0.11  | 0.118 | 0.0856 | 0.0952          | 0.093 | 0.099 | 0.089        | 0.103 | 0.097 | 10.6%   |
| 9    | S11         | 0.04918  | 0.0438 | 0.034                 | 0.0233 | 0.0379 | 0.0572           | 0.034 | 0.029 | 0.037 | 0.039                | 0.037 | 0.039 | 0.0428 | 0.0595          | 0.058 | 0.056 | 0.054        | 0.052 | 0.056 | 4.4%    |
| 4    | S12         | 0.07377  | 0.1095 | 0.1359                | 0.0932 | 0.0758 | 0.1143           | 0.135 | 0.117 | 0.111 | 0.117                | 0.11  | 0.118 | 0.0856 | 0.0952          | 0.093 | 0.099 | 0.107        | 0.103 | 0.097 | 10.5%   |
| 8    | S13         | 0.04918  | 0.0657 | 0.034                 | 0.0233 | 0.0379 | 0.0572           | 0.034 | 0.029 | 0.037 | 0.039                | 0.037 | 0.039 | 0.0428 | 0.0595          | 0.058 | 0.056 | 0.054        | 0.052 | 0.056 | 4.5%    |
| 5    | S14         | 0.09836  | 0.0876 | 0.068                 | 0.0699 | 0.1517 | 0.0572           | 0.067 | 0.088 | 0.111 | 0.078                | 0.11  | 0.079 | 0.0856 | 0.0833          | 0.081 | 0.085 | 0.089        | 0.086 | 0.083 | 8.7%    |
| 18   | S15         | 0.0082   | 0.0073 | 0.0194                | 0.0058 | 0.0108 | 0.0095           | 0.015 | 0.007 | 0.014 | 0.008                | 0.014 | 0.008 | 0.0122 | 0.0119          | 0.012 | 0.014 | 0.009        | 0.009 | 0.014 | 1.1%    |
| 19   | S16         | 0.0082   | 0.0073 | 0.0151                | 0.0058 | 0.0108 | 0.0095           | 0.015 | 0.007 | 0.014 | 0.008                | 0.014 | 0.008 | 0.0122 | 0.0119          | 0.012 | 0.014 | 0.009        | 0.009 | 0.014 | 1.1%    |
| 16   | S17         | 0.0123   | 0.0109 | 0.017                 | 0.0078 | 0.0126 | 0.0114           | 0.017 | 0.01  | 0.016 | 0.01                 | 0.016 | 0.01  | 0.0143 | 0.0119          | 0.012 | 0.014 | 0.018        | 0.017 | 0.014 | 1.3%    |
| 14   | S18         | 0.02459  | 0.0219 | 0.0194                | 0.0117 | 0.0152 | 0.0143           | 0.019 | 0.015 | 0.022 | 0.013                | 0.018 | 0.013 | 0.0171 | 0.0238          | 0.023 | 0.014 | 0.018        | 0.017 | 0.014 | 1.8%    |
| 15   | S19         | 0.02459  | 0.0219 | 0.0194                | 0.0078 | 0.0152 | 0.0143           | 0.019 | 0.015 | 0.019 | 0.013                | 0.018 | 0.013 | 0.0171 | 0.0238          | 0.023 | 0.014 | 0.018        | 0.017 | 0.014 | 1.7%    |
| 17   | S20         | 0.0123   | 0.0109 | 0.017                 | 0.0058 | 0.0126 | 0.0114           | 0.017 | 0.01  | 0.016 | 0.01                 | 0.016 | 0.01  | 0.0143 | 0.0119          | 0.012 | 0.014 | 0.018        | 0.017 | 0.014 | 1.3%    |
|      |             | 1        | 1      | 1                     | 1      | 1      | 1                | 1     | 1     | 1     | 1                    | 1     | 1     | 1      | 1               | 1     | 1     | 1            | 1     | 1     | 1       |

# S21.4 Provincial Transportation Agency Central Java

| RANK | STAKEHOLDER | National |        | Central Java Province |        |       | Wonosobo Regency |       |       |       | Banjarnegara Regency |       |       |        | Local Community |       |       | User/Tourist |       |       | Everage |
|------|-------------|----------|--------|-----------------------|--------|-------|------------------|-------|-------|-------|----------------------|-------|-------|--------|-----------------|-------|-------|--------------|-------|-------|---------|
|      |             | S1       | S2     | S3                    | S5     | S6    | S7               | S8    | S9    | S10   | S11                  | S12   | S13   | S14    | S15             | S16   | S17   | S18          | S19   | S20   |         |
| 17   | S1          | 0.01325  | 0.0109 | 0.026                 | 0.0118 | 0.016 | 0.0095           | 0.009 | 0.016 | 0.016 | 0.011                | 0.009 | 0.015 | 0.0106 | 0.0146          | 0.016 | 0.013 | 0.01         | 0.009 | 0.009 | 1.3%    |
| 19   | S2          | 0.01325  | 0.0109 | 0.013                 | 0.0101 | 0.008 | 0.0076           | 0.007 | 0.014 | 0.008 | 0.009                | 0.007 | 0.013 | 0.007  | 0.0129          | 0.015 | 0.011 | 0.008        | 0.007 | 0.007 | 1.0%    |
| 18   | S3          | 0.00662  | 0.0109 | 0.013                 | 0.0118 | 0.016 | 0.0095           | 0.009 | 0.016 | 0.016 | 0.011                | 0.009 | 0.015 | 0.0106 | 0.0146          | 0.016 | 0.013 | 0.01         | 0.009 | 0.009 | 1.2%    |
| 6    | S5          | 0.07947  | 0.0761 | 0.0779                | 0.0708 | 0.08  | 0.0763           | 0.085 | 0.113 | 0.082 | 0.054                | 0.084 | 0.107 | 0.0845 | 0.0583          | 0.066 | 0.04  | 0.05         | 0.069 | 0.081 | 7.5%    |
| 16   | S6          | 0.01325  | 0.0217 | 0.013                 | 0.0142 | 0.016 | 0.0127           | 0.014 | 0.019 | 0.008 | 0.014                | 0.014 | 0.018 | 0.0211 | 0.0166          | 0.019 | 0.016 | 0.013        | 0.012 | 0.014 | 1.5%    |
| 9    | S7          | 0.05298  | 0.0543 | 0.0519                | 0.0354 | 0.048 | 0.0382           | 0.028 | 0.038 | 0.049 | 0.054                | 0.028 | 0.036 | 0.0423 | 0.0291          | 0.033 | 0.04  | 0.05         | 0.104 | 0.027 | 4.4%    |
| 11   | S8          | 0.03974  | 0.0435 | 0.039                 | 0.0236 | 0.032 | 0.0382           | 0.028 | 0.028 | 0.033 | 0.027                | 0.028 | 0.027 | 0.0211 | 0.0233          | 0.026 | 0.026 | 0.025        | 0.035 | 0.054 | 3.1%    |
| 3    | S9          | 0.09272  | 0.087  | 0.0909                | 0.0708 | 0.096 | 0.1145           | 0.113 | 0.113 | 0.098 | 0.109                | 0.111 | 0.107 | 0.1056 | 0.2331          | 0.132 | 0.079 | 0.101        | 0.104 | 0.108 | 10.9%   |
| 15   | S10         | 0.01325  | 0.0217 | 0.013                 | 0.0142 | 0.032 | 0.0127           | 0.014 | 0.019 | 0.016 | 0.014                | 0.014 | 0.018 | 0.0211 | 0.0166          | 0.019 | 0.016 | 0.013        | 0.012 | 0.014 | 1.6%    |
| 7    | S11         | 0.06623  | 0.0652 | 0.0649                | 0.0708 | 0.064 | 0.0382           | 0.056 | 0.056 | 0.066 | 0.054                | 0.056 | 0.053 | 0.0634 | 0.0388          | 0.044 | 0.079 | 0.101        | 0.035 | 0.054 | 5.9%    |
| 12   | S12         | 0.03974  | 0.0435 | 0.039                 | 0.0236 | 0.032 | 0.0382           | 0.028 | 0.028 | 0.033 | 0.027                | 0.028 | 0.027 | 0.0211 | 0.0233          | 0.026 | 0.026 | 0.025        | 0.035 | 0.027 | 3.0%    |
| 4    | S13         | 0.09272  | 0.087  | 0.0909                | 0.0708 | 0.096 | 0.1145           | 0.113 | 0.113 | 0.098 | 0.109                | 0.111 | 0.107 | 0.1056 | 0.1165          | 0.132 | 0.079 | 0.101        | 0.104 | 0.108 | 10.3%   |
| 14   | S14         | 0.02649  | 0.0326 | 0.026                 | 0.0177 | 0.016 | 0.0191           | 0.028 | 0.023 | 0.016 | 0.018                | 0.028 | 0.021 | 0.0211 | 0.0194          | 0.022 | 0.02  | 0.017        | 0.017 | 0.027 | 2.2%    |
| 2    | S15         | 0.10596  | 0.0978 | 0.1039                | 0.1416 | 0.112 | 0.1527           | 0.141 | 0.056 | 0.115 | 0.163                | 0.139 | 0.107 | 0.1268 | 0.1165          | 0.132 | 0.158 | 0.151        | 0.139 | 0.135 | 12.6%   |
| 1    | S16         | 0.10596  | 0.0978 | 0.1039                | 0.1416 | 0.112 | 0.1527           | 0.141 | 0.113 | 0.115 | 0.163                | 0.139 | 0.107 | 0.1268 | 0.1165          | 0.132 | 0.158 | 0.151        | 0.139 | 0.135 | 12.9%   |
| 5    | S17         | 0.07947  | 0.0761 | 0.0779                | 0.1416 | 0.08  | 0.0763           | 0.085 | 0.113 | 0.082 | 0.054                | 0.084 | 0.107 | 0.0845 | 0.0583          | 0.066 | 0.079 | 0.05         | 0.069 | 0.081 | 8.1%    |
| 8    | S18         | 0.06623  | 0.0652 | 0.0649                | 0.0708 | 0.064 | 0.0382           | 0.056 | 0.056 | 0.066 | 0.027                | 0.056 | 0.053 | 0.0634 | 0.0388          | 0.044 | 0.079 | 0.05         | 0.035 | 0.054 | 5.5%    |
| 10   | S19         | 0.05298  | 0.0543 | 0.0519                | 0.0354 | 0.048 | 0.0127           | 0.028 | 0.038 | 0.049 | 0.054                | 0.028 | 0.036 | 0.0423 | 0.0291          | 0.033 | 0.04  | 0.05         | 0.035 | 0.027 | 3.9%    |
| 13   | S20         | 0.03974  | 0.0435 | 0.039                 | 0.0236 | 0.032 | 0.0382           | 0.014 | 0.028 | 0.033 | 0.027                | 0.028 | 0.027 | 0.0211 | 0.0233          | 0.026 | 0.026 | 0.025        | 0.035 | 0.027 | 2.9%    |
|      |             | 1        | 1      | 1                     | 1      | 1     | 1                | 1     | 1     | 1     | 1                    | 1     | 1     | 1      | 1               | 1     | 1     | 1            | 1     | 1     | 1       |

# S21.5 The Central Java Provincial Tourism Office

| RANK | STAKEHOLDER | National |        | Central Java Province |        |        | Wonosobo Regency |       |       |       | Banjarnegara Regency |       |       |        | Local Community |       |       | User/Tourist |       |       | Everage |
|------|-------------|----------|--------|-----------------------|--------|--------|------------------|-------|-------|-------|----------------------|-------|-------|--------|-----------------|-------|-------|--------------|-------|-------|---------|
|      |             | S1       | S2     | S3                    | S4     | S6     | S7               | S8    | S9    | S10   | S11                  | S12   | S13   | S14    | S15             | S16   | S17   | S18          | S19   | S20   |         |
| 13   | S1          | 0.02135  | 0.0277 | 0.0172                | 0.0195 | 0.0178 | 0.0166           | 0.023 | 0.018 | 0.021 | 0.018                | 0.023 | 0.028 | 0.019  | 0.027           | 0.027 | 0.033 | 0.041        | 0.017 | 0.016 | 2.3%    |
| 12   | S2          | 0.02135  | 0.0277 | 0.0206                | 0.0234 | 0.0237 | 0.0222           | 0.029 | 0.037 | 0.031 | 0.027                | 0.028 | 0.028 | 0.0379 | 0.027           | 0.04  | 0.044 | 0.021        | 0.033 | 0.033 | 2.9%    |
| 1    | S3          | 0.12811  | 0.1386 | 0.1029                | 0.234  | 0.1424 | 0.133            | 0.116 | 0.146 | 0.021 | 0.16                 | 0.113 | 0.141 | 0.1517 | 0.1081          | 0.107 | 0.099 | 0.124        | 0.117 | 0.114 | 12.6%   |
| 2    | S4          | 0.12811  | 0.1386 | 0.0515                | 0.117  | 0.1424 | 0.133            | 0.116 | 0.146 | 0.187 | 0.16                 | 0.113 | 0.141 | 0.1517 | 0.1081          | 0.107 | 0.099 | 0.124        | 0.117 | 0.114 | 12.6%   |
| 5    | S6          | 0.08541  | 0.0831 | 0.0515                | 0.0585 | 0.0712 | 0.0665           | 0.116 | 0.073 | 0.062 | 0.053                | 0.057 | 0.085 | 0.0759 | 0.0811          | 0.08  | 0.077 | 0.083        | 0.083 | 0.081 | 7.5%    |
| 6    | S7          | 0.08541  | 0.0831 | 0.0515                | 0.0585 | 0.0712 | 0.0665           | 0.039 | 0.073 | 0.062 | 0.053                | 0.113 | 0.085 | 0.0759 | 0.0811          | 0.08  | 0.077 | 0.083        | 0.083 | 0.081 | 7.4%    |
| 3    | S8          | 0.10676  | 0.1109 | 0.1029                | 0.117  | 0.0712 | 0.1994           | 0.116 | 0.11  | 0.124 | 0.107                | 0.113 | 0.113 | 0.1138 | 0.0946          | 0.093 | 0.088 | 0.103        | 0.1   | 0.098 | 11.0%   |
| 10   | S9          | 0.0427   | 0.0277 | 0.0257                | 0.0293 | 0.0356 | 0.0332           | 0.039 | 0.037 | 0.062 | 0.053                | 0.038 | 0.014 | 0.0379 | 0.0541          | 0.053 | 0.055 | 0.041        | 0.05  | 0.049 | 4.1%    |
| 7    | S10         | 0.06406  | 0.0554 | 0.3088                | 0.039  | 0.0712 | 0.0665           | 0.058 | 0.037 | 0.062 | 0.053                | 0.057 | 0.056 | 0.0379 | 0.0676          | 0.067 | 0.066 | 0.062        | 0.067 | 0.065 | 7.2%    |
| 8    | S11         | 0.06406  | 0.0554 | 0.0343                | 0.039  | 0.0712 | 0.0665           | 0.058 | 0.037 | 0.062 | 0.053                | 0.057 | 0.056 | 0.0379 | 0.0676          | 0.067 | 0.066 | 0.062        | 0.067 | 0.065 | 5.7%    |
| 4    | S12         | 0.10676  | 0.1109 | 0.1029                | 0.117  | 0.1424 | 0.0665           | 0.116 | 0.11  | 0.124 | 0.107                | 0.113 | 0.113 | 0.1138 | 0.0946          | 0.093 | 0.088 | 0.103        | 0.1   | 0.098 | 10.6%   |
| 11   | S13         | 0.02135  | 0.0277 | 0.0206                | 0.0234 | 0.0237 | 0.0222           | 0.029 | 0.073 | 0.031 | 0.027                | 0.028 | 0.028 | 0.0379 | 0.0405          | 0.04  | 0.044 | 0.021        | 0.033 | 0.033 | 3.2%    |
| 9    | S14         | 0.0427   | 0.0277 | 0.0257                | 0.0293 | 0.0356 | 0.0332           | 0.039 | 0.037 | 0.062 | 0.053                | 0.038 | 0.028 | 0.0379 | 0.0541          | 0.053 | 0.055 | 0.041        | 0.05  | 0.049 | 4.2%    |
| 17   | S15         | 0.01068  | 0.0139 | 0.0129                | 0.0146 | 0.0119 | 0.0111           | 0.017 | 0.009 | 0.012 | 0.011                | 0.016 | 0.009 | 0.0095 | 0.0135          | 0.013 | 0.011 | 0.01         | 0.017 | 0.016 | 1.3%    |
| 18   | S16         | 0.01068  | 0.0092 | 0.0129                | 0.0146 | 0.0119 | 0.0111           | 0.017 | 0.009 | 0.012 | 0.011                | 0.016 | 0.009 | 0.0095 | 0.0135          | 0.013 | 0.011 | 0.01         | 0.017 | 0.016 | 1.2%    |
| 19   | S17         | 0.00712  | 0.0069 | 0.0114                | 0.013  | 0.0102 | 0.0095           | 0.014 | 0.007 | 0.01  | 0.009                | 0.014 | 0.007 | 0.0076 | 0.0135          | 0.013 | 0.011 | 0.007        | 0.008 | 0.008 | 1.0%    |
| 14   | S18         | 0.01068  | 0.0277 | 0.0172                | 0.0195 | 0.0178 | 0.0166           | 0.023 | 0.018 | 0.021 | 0.018                | 0.023 | 0.028 | 0.019  | 0.027           | 0.027 | 0.033 | 0.021        | 0.017 | 0.016 | 2.1%    |
| 15   | S19         | 0.02135  | 0.0139 | 0.0147                | 0.0167 | 0.0142 | 0.0133           | 0.019 | 0.012 | 0.016 | 0.013                | 0.019 | 0.014 | 0.0126 | 0.0135          | 0.013 | 0.022 | 0.021        | 0.017 | 0.033 | 1.7%    |
| 16   | S20         | 0.02135  | 0.0139 | 0.0147                | 0.0167 | 0.0142 | 0.0133           | 0.019 | 0.012 | 0.016 | 0.013                | 0.019 | 0.014 | 0.0126 | 0.0135          | 0.013 | 0.022 | 0.021        | 0.008 | 0.016 | 1.5%    |
|      |             | 1        | 1      | 1                     | 1      | 1      | 1                | 1     | 1     | 1     | 1                    | 1     | 1     | 1      | 1               | 1     | 1     | 1            | 1     | 1     | 1       |

## S21.6 The Central Java Land Transport Organization

| RANK | STAKEHOLDER | National |        | Central Java Province |        |        | Wonosobo Regency |       |       |       | Banjarnegara Regency |       |       |        | Local Community |       |       | User/Tourist |       |       | Everage |
|------|-------------|----------|--------|-----------------------|--------|--------|------------------|-------|-------|-------|----------------------|-------|-------|--------|-----------------|-------|-------|--------------|-------|-------|---------|
|      |             | S1       | S2     | S3                    | S4     | S5     | S7               | S8    | S9    | S10   | S11                  | S12   | S13   | S14    | S15             | S16   | S17   | S18          | S19   | S20   |         |
| 12   | S1          | 0.02697  | 0.0208 | 0.0323                | 0.03   | 0.0263 | 0.0369           | 0.019 | 0.024 | 0.026 | 0.023                | 0.042 | 0.026 | 0.0231 | 0.0244          | 0.071 | 0.027 | 0.032        | 0.038 | 0.02  | 3.00%   |
| 14   | S2          | 0.02697  | 0.0208 | 0.0161                | 0.025  | 0.021  | 0.0184           | 0.019 | 0.019 | 0.018 | 0.017                | 0.032 | 0.019 | 0.0192 | 0.0162          | 0.018 | 0.027 | 0.016        | 0.026 | 0.059 | 2.28%   |
| 16   | S3          | 0.01348  | 0.0208 | 0.0161                | 0.0214 | 0.0175 | 0.0123           | 0.013 | 0.016 | 0.013 | 0.014                | 0.021 | 0.016 | 0.0165 | 0.0122          | 0.012 | 0.014 | 0.016        | 0.013 | 0.02  | 1.56%   |
| 1    | S4          | 0.13483  | 0.1246 | 0.1129                | 0.1499 | 0.1052 | 0.1475           | 0.15  | 0.19  | 0.158 | 0.139                | 0.095 | 0.155 | 0.2306 | 0.1461          | 0.142 | 0.137 | 0.112        | 0.103 | 0.118 | 13.95%  |
| 3    | S5          | 0.10787  | 0.1038 | 0.0968                | 0.1499 | 0.1052 | 0.1106           | 0.113 | 0.095 | 0.105 | 0.07                 | 0.084 | 0.078 | 0.1153 | 0.0974          | 0.107 | 0.109 | 0.096        | 0.09  | 0.098 | 10.17%  |
| 10   | S7          | 0.02697  | 0.0415 | 0.0484                | 0.0375 | 0.0351 | 0.0369           | 0.038 | 0.032 | 0.053 | 0.035                | 0.053 | 0.039 | 0.0288 | 0.0487          | 0.036 | 0.027 | 0.048        | 0.051 | 0.039 | 3.97%   |
| 9    | S8          | 0.05393  | 0.0415 | 0.0484                | 0.0375 | 0.0351 | 0.0369           | 0.038 | 0.032 | 0.053 | 0.035                | 0.053 | 0.039 | 0.0288 | 0.0487          | 0.036 | 0.027 | 0.048        | 0.051 | 0.039 | 4.11%   |
| 4    | S9          | 0.10787  | 0.1038 | 0.0968                | 0.0749 | 0.1052 | 0.1106           | 0.113 | 0.095 | 0.105 | 0.07                 | 0.084 | 0.078 | 0.1153 | 0.0974          | 0.107 | 0.109 | 0.096        | 0.09  | 0.098 | 9.77%   |
| 7    | S10         | 0.05393  | 0.0623 | 0.0645                | 0.05   | 0.0526 | 0.0369           | 0.038 | 0.048 | 0.053 | 0.07                 | 0.063 | 0.078 | 0.0384 | 0.0974          | 0.036 | 0.055 | 0.064        | 0.064 | 0.059 | 5.69%   |
| 6    | S11         | 0.0809   | 0.083  | 0.0806                | 0.0749 | 0.1052 | 0.0738           | 0.075 | 0.095 | 0.053 | 0.07                 | 0.074 | 0.039 | 0.0577 | 0.0487          | 0.071 | 0.082 | 0.08         | 0.077 | 0.079 | 7.36%   |
| 19   | S12         | 0.00674  | 0.0069 | 0.0081                | 0.0167 | 0.0132 | 0.0074           | 0.008 | 0.012 | 0.009 | 0.01                 | 0.011 | 0.011 | 0.0128 | 0.0081          | 0.007 | 0.007 | 0.008        | 0.013 | 0.007 | 0.95%   |
| 5    | S13         | 0.0809   | 0.083  | 0.0806                | 0.0749 | 0.1052 | 0.0738           | 0.075 | 0.095 | 0.053 | 0.139                | 0.074 | 0.078 | 0.0577 | 0.0487          | 0.071 | 0.082 | 0.08         | 0.077 | 0.079 | 7.93%   |
| 2    | S14         | 0.13483  | 0.1246 | 0.1129                | 0.0749 | 0.1052 | 0.1475           | 0.15  | 0.095 | 0.158 | 0.139                | 0.095 | 0.155 | 0.1153 | 0.1461          | 0.142 | 0.137 | 0.112        | 0.103 | 0.118 | 12.45%  |
| 8    | S15         | 0.05393  | 0.0623 | 0.0645                | 0.05   | 0.0526 | 0.0369           | 0.038 | 0.048 | 0.026 | 0.07                 | 0.063 | 0.078 | 0.0384 | 0.0487          | 0.036 | 0.055 | 0.064        | 0.064 | 0.059 | 5.30%   |
| 11   | S16         | 0.01348  | 0.0415 | 0.0484                | 0.0375 | 0.0351 | 0.0369           | 0.038 | 0.032 | 0.053 | 0.035                | 0.053 | 0.039 | 0.0288 | 0.0487          | 0.036 | 0.027 | 0.048        | 0.051 | 0.039 | 3.89%   |
| 13   | S17         | 0.02697  | 0.0208 | 0.0323                | 0.03   | 0.0263 | 0.0369           | 0.038 | 0.024 | 0.026 | 0.023                | 0.042 | 0.026 | 0.0231 | 0.0244          | 0.036 | 0.027 | 0.032        | 0.038 | 0.02  | 2.91%   |
| 17   | S18         | 0.01348  | 0.0208 | 0.0081                | 0.0214 | 0.0175 | 0.0123           | 0.013 | 0.016 | 0.013 | 0.014                | 0.021 | 0.016 | 0.0165 | 0.0122          | 0.012 | 0.014 | 0.016        | 0.013 | 0.02  | 1.52%   |
| 18   | S19         | 0.00899  | 0.0104 | 0.0161                | 0.0187 | 0.015  | 0.0092           | 0.009 | 0.014 | 0.011 | 0.012                | 0.011 | 0.013 | 0.0144 | 0.0097          | 0.009 | 0.009 | 0.016        | 0.013 | 0.01  | 1.20%   |
| 15   | S20         | 0.02697  | 0.0069 | 0.0161                | 0.025  | 0.021  | 0.0184           | 0.019 | 0.019 | 0.018 | 0.017                | 0.032 | 0.019 | 0.0192 | 0.0162          | 0.018 | 0.027 | 0.016        | 0.026 | 0.02  | 2.00%   |
|      |             | 1        | 1      | 1                     | 1      | 1      | 1                | 1     | 1     | 1     | 1                    | 1     | 1     | 1      | 1               | 1     | 1     | 1            | 1     | 1     | 1       |

### S21.7 Regional Planning and Development Agency of Wonosobo Regency

| RANK | STAKEHOLDER | National |        | Central Java Province |        |        |        | Wonosobo Regency |       |       | Banjarnegara Regency |       |       |        | Local Community |       |       | User/Tourist |       |       | Everage |
|------|-------------|----------|--------|-----------------------|--------|--------|--------|------------------|-------|-------|----------------------|-------|-------|--------|-----------------|-------|-------|--------------|-------|-------|---------|
|      |             | S1       | S2     | S3                    | S4     | S5     | S6     | S8               | S9    | S10   | S11                  | S12   | S13   | S14    | S15             | S16   | S17   | S18          | S19   | S20   |         |
| 15   | S1          | 0.02083  | 0.0178 | 0.0188                | 0.0286 | 0.0175 | 0.0165 | 0.02             | 0.022 | 0.022 | 0.008                | 0.026 | 0.021 | 0.026  | 0.0228          | 0.019 | 0.018 | 0.018        | 0.027 | 0.027 | 2.1%    |
| 10   | S2          | 0.04167  | 0.0355 | 0.0188                | 0.0286 | 0.0524 | 0.0496 | 0.041            | 0.033 | 0.033 | 0.049                | 0.053 | 0.043 | 0.0519 | 0.038           | 0.032 | 0.036 | 0.037        | 0.027 | 0.027 | 3.8%    |
| 8    | S3          | 0.04167  | 0.071  | 0.0375                | 0.0286 | 0.0524 | 0.0496 | 0.041            | 0.033 | 0.033 | 0.049                | 0.053 | 0.043 | 0.0519 | 0.038           | 0.032 | 0.036 | 0.037        | 0.027 | 0.027 | 4.1%    |
| 11   | S4          | 0.02083  | 0.0355 | 0.0375                | 0.0286 | 0.0262 | 0.0331 | 0.027            | 0.026 | 0.027 | 0.033                | 0.04  | 0.021 | 0.039  | 0.0285          | 0.024 | 0.024 | 0.037        | 0.08  | 0.027 | 3.2%    |
| 7    | S5          | 0.0625   | 0.0355 | 0.0375                | 0.0571 | 0.0524 | 0.0661 | 0.082            | 0.044 | 0.044 | 0.065                | 0.066 | 0.064 | 0.0649 | 0.057           | 0.049 | 0.073 | 0.037        | 0.053 | 0.055 | 5.6%    |
| 16   | S6          | 0.02083  | 0.0118 | 0.0125                | 0.0143 | 0.0131 | 0.0165 | 0.016            | 0.019 | 0.019 | 0.033                | 0.013 | 0.021 | 0.013  | 0.019           | 0.016 | 0.015 | 0.012        | 0.013 | 0.014 | 1.6%    |
| 5    | S8          | 0.08333  | 0.071  | 0.075                 | 0.0857 | 0.0524 | 0.0826 | 0.082            | 0.066 | 0.066 | 0.081                | 0.079 | 0.085 | 0.0779 | 0.114           | 0.097 | 0.146 | 0.074        | 0.08  | 0.082 | 8.3%    |
| 2    | S9          | 0.125    | 0.142  | 0.15                  | 0.1429 | 0.1573 | 0.1157 | 0.163            | 0.132 | 0.133 | 0.114                | 0.106 | 0.128 | 0.1039 | 0.114           | 0.097 | 0.146 | 0.147        | 0.133 | 0.136 | 13.1%   |
| 1    | S10         | 0.125    | 0.142  | 0.15                  | 0.1429 | 0.1573 | 0.1157 | 0.163            | 0.132 | 0.133 | 0.114                | 0.106 | 0.128 | 0.1039 | 0.114           | 0.097 | 0.146 | 0.147        | 0.133 | 0.164 | 13.2%   |
| 17   | S11         | 0.04167  | 0.0118 | 0.0125                | 0.0143 | 0.0131 | 0.0083 | 0.016            | 0.019 | 0.019 | 0.016                | 0.013 | 0.021 | 0.013  | 0.019           | 0.016 | 0.015 | 0.012        | 0.013 | 0.014 | 1.6%    |
| 18   | S12         | 0.01042  | 0.0089 | 0.0094                | 0.0095 | 0.0105 | 0.0165 | 0.014            | 0.017 | 0.017 | 0.016                | 0.013 | 0.011 | 0.026  | 0.0163          | 0.014 | 0.012 | 0.009        | 0.009 | 0.009 | 1.3%    |
| 14   | S13         | 0.02083  | 0.0178 | 0.0188                | 0.0286 | 0.0175 | 0.0165 | 0.02             | 0.022 | 0.022 | 0.016                | 0.026 | 0.021 | 0.026  | 0.0228          | 0.019 | 0.018 | 0.018        | 0.027 | 0.027 | 2.1%    |
| 19   | S14         | 0.01042  | 0.0089 | 0.0094                | 0.0095 | 0.0105 | 0.0165 | 0.014            | 0.017 | 0.017 | 0.016                | 0.007 | 0.011 | 0.013  | 0.0163          | 0.014 | 0.012 | 0.009        | 0.009 | 0.009 | 1.2%    |
| 3    | S15         | 0.10417  | 0.1065 | 0.1125                | 0.1143 | 0.1049 | 0.0992 | 0.082            | 0.132 | 0.133 | 0.098                | 0.093 | 0.106 | 0.0909 | 0.114           | 0.195 | 0.073 | 0.11         | 0.106 | 0.109 | 11.0%   |
| 4    | S16         | 0.10417  | 0.1065 | 0.1125                | 0.1143 | 0.1049 | 0.0992 | 0.082            | 0.132 | 0.133 | 0.098                | 0.093 | 0.106 | 0.0909 | 0.057           | 0.097 | 0.073 | 0.11         | 0.106 | 0.109 | 10.2%   |
| 6    | S17         | 0.08333  | 0.071  | 0.075                 | 0.0857 | 0.0524 | 0.0826 | 0.041            | 0.066 | 0.066 | 0.081                | 0.079 | 0.085 | 0.0779 | 0.114           | 0.097 | 0.073 | 0.074        | 0.08  | 0.082 | 7.7%    |
| 9    | S18         | 0.04167  | 0.0355 | 0.0375                | 0.0286 | 0.0524 | 0.0496 | 0.041            | 0.033 | 0.033 | 0.049                | 0.053 | 0.043 | 0.0519 | 0.038           | 0.032 | 0.036 | 0.037        | 0.027 | 0.027 | 3.9%    |
| 13   | S19         | 0.02083  | 0.0355 | 0.0375                | 0.0095 | 0.0262 | 0.0331 | 0.027            | 0.026 | 0.027 | 0.033                | 0.04  | 0.021 | 0.039  | 0.0285          | 0.024 | 0.024 | 0.037        | 0.027 | 0.027 | 2.9%    |
| 12   | S20         | 0.02083  | 0.0355 | 0.0375                | 0.0286 | 0.0262 | 0.0331 | 0.027            | 0.026 | 0.022 | 0.033                | 0.04  | 0.021 | 0.039  | 0.0285          | 0.024 | 0.024 | 0.037        | 0.027 | 0.027 | 2.9%    |
|      |             | 1        | 1      | 1                     | 1      | 1      | 1      | 1                | 1     | 1     | 1                    | 1     | 1     | 1      | 1               | 1     | 1     | 1            | 1     | 1     | 1       |



# S21.8 Transportation Office of Wonosobo Regency

| RANK | STAKEHOLDER | National |        | Central Java Province |        |        |        | Wonosobo Regency |       |       | Banjarnegara Regency |       |       |        | Local Community |       |       | User/Tourist |       |       | Everage |
|------|-------------|----------|--------|-----------------------|--------|--------|--------|------------------|-------|-------|----------------------|-------|-------|--------|-----------------|-------|-------|--------------|-------|-------|---------|
|      |             | S1       | S2     | S3                    | S4     | S5     | S6     | S7               | S9    | S10   | S11                  | S12   | S13   | S14    | S15             | S16   | S17   | S18          | S19   | S20   |         |
| 5    | S1          | 0.08026  | 0.0558 | 0.0714                | 0.0588 | 0.1142 | 0.0833 | 0.098            | 0.143 | 0.068 | 0.052                | 0.078 | 0.085 | 0.0876 | 0.0854          | 0.081 | 0.083 | 0.082        | 0.08  | 0.079 | 8.2%    |
| 7    | S2          | 0.08026  | 0.0558 | 0.0476                | 0.0392 | 0.0571 | 0.0694 | 0.049            | 0.072 | 0.102 | 0.052                | 0.039 | 0.057 | 0.0584 | 0.0641          | 0.065 | 0.067 | 0.068        | 0.067 | 0.067 | 6.2%    |
| 1    | S3          | 0.16052  | 0.1673 | 0.1428                | 0.2352 | 0.1142 | 0.1111 | 0.098            | 0.143 | 0.136 | 0.157                | 0.156 | 0.142 | 0.146  | 0.1281          | 0.114 | 0.117 | 0.109        | 0.107 | 0.101 | 13.6%   |
| 2    | S4          | 0.16052  | 0.1673 | 0.0714                | 0.1176 | 0.1142 | 0.1111 | 0.098            | 0.143 | 0.136 | 0.157                | 0.156 | 0.142 | 0.146  | 0.1281          | 0.114 | 0.117 | 0.109        | 0.107 | 0.101 | 12.6%   |
| 3    | S5          | 0.08026  | 0.1115 | 0.1428                | 0.1176 | 0.1142 | 0.0972 | 0.195            | 0.072 | 0.102 | 0.105                | 0.117 | 0.113 | 0.1168 | 0.1068          | 0.098 | 0.1   | 0.095        | 0.093 | 0.09  | 10.9%   |
| 17   | S6          | 0.01338  | 0.0112 | 0.0178                | 0.0147 | 0.0163 | 0.0139 | 0.014            | 0.012 | 0.017 | 0.01                 | 0.01  | 0.009 | 0.0097 | 0.0107          | 0.016 | 0.017 | 0.014        | 0.013 | 0.011 | 1.3%    |
| 4    | S7          | 0.08026  | 0.1115 | 0.1428                | 0.1176 | 0.0571 | 0.0972 | 0.098            | 0.072 | 0.102 | 0.105                | 0.117 | 0.113 | 0.1168 | 0.1068          | 0.098 | 0.1   | 0.095        | 0.093 | 0.09  | 10.1%   |
| 6    | S9          | 0.04013  | 0.0558 | 0.0714                | 0.0588 | 0.1142 | 0.0833 | 0.098            | 0.072 | 0.068 | 0.052                | 0.078 | 0.085 | 0.0876 | 0.0854          | 0.081 | 0.083 | 0.082        | 0.08  | 0.079 | 7.7%    |
| 10   | S10         | 0.04013  | 0.0186 | 0.0357                | 0.0294 | 0.0381 | 0.0278 | 0.033            | 0.036 | 0.034 | 0.052                | 0.02  | 0.028 | 0.0292 | 0.0427          | 0.049 | 0.05  | 0.054        | 0.053 | 0.056 | 3.8%    |
| 8    | S11         | 0.08026  | 0.0558 | 0.0476                | 0.0392 | 0.0571 | 0.0694 | 0.049            | 0.072 | 0.034 | 0.052                | 0.039 | 0.057 | 0.0292 | 0.0641          | 0.065 | 0.067 | 0.068        | 0.067 | 0.067 | 5.7%    |
| 9    | S12         | 0.04013  | 0.0558 | 0.0357                | 0.0294 | 0.0381 | 0.0556 | 0.033            | 0.036 | 0.068 | 0.052                | 0.039 | 0.028 | 0.0292 | 0.0427          | 0.049 | 0.05  | 0.054        | 0.053 | 0.056 | 4.4%    |
| 12   | S13         | 0.02675  | 0.0279 | 0.0286                | 0.0235 | 0.0286 | 0.0417 | 0.024            | 0.024 | 0.034 | 0.026                | 0.039 | 0.028 | 0.0292 | 0.0214          | 0.033 | 0.033 | 0.041        | 0.04  | 0.045 | 3.1%    |
| 11   | S14         | 0.02675  | 0.0279 | 0.0286                | 0.0235 | 0.0286 | 0.0417 | 0.024            | 0.024 | 0.034 | 0.052                | 0.039 | 0.028 | 0.0292 | 0.0214          | 0.033 | 0.033 | 0.041        | 0.04  | 0.045 | 3.3%    |
| 13   | S15         | 0.02006  | 0.0186 | 0.0238                | 0.0196 | 0.0228 | 0.0278 | 0.02             | 0.018 | 0.017 | 0.017                | 0.02  | 0.028 | 0.0292 | 0.0214          | 0.016 | 0.017 | 0.027        | 0.027 | 0.034 | 2.2%    |
| 15   | S16         | 0.01605  | 0.0139 | 0.0204                | 0.0168 | 0.019  | 0.0139 | 0.016            | 0.014 | 0.011 | 0.013                | 0.013 | 0.014 | 0.0146 | 0.0214          | 0.016 | 0.008 | 0.014        | 0.013 | 0.022 | 1.5%    |
| 14   | S17         | 0.01605  | 0.0139 | 0.0204                | 0.0168 | 0.019  | 0.0139 | 0.016            | 0.014 | 0.011 | 0.013                | 0.013 | 0.014 | 0.0146 | 0.0214          | 0.033 | 0.017 | 0.014        | 0.013 | 0.022 | 1.7%    |
| 16   | S18         | 0.01338  | 0.0112 | 0.0178                | 0.0147 | 0.0163 | 0.0139 | 0.014            | 0.012 | 0.009 | 0.01                 | 0.01  | 0.009 | 0.0097 | 0.0107          | 0.016 | 0.017 | 0.014        | 0.027 | 0.011 | 1.3%    |
| 18   | S19         | 0.01338  | 0.0112 | 0.0178                | 0.0147 | 0.0163 | 0.0139 | 0.014            | 0.012 | 0.009 | 0.01                 | 0.01  | 0.009 | 0.0097 | 0.0107          | 0.016 | 0.017 | 0.007        | 0.013 | 0.011 | 1.2%    |
| 19   | S20         | 0.01147  | 0.0093 | 0.0159                | 0.0131 | 0.0143 | 0.0139 | 0.012            | 0.01  | 0.007 | 0.009                | 0.008 | 0.007 | 0.0073 | 0.0071          | 0.008 | 0.008 | 0.014        | 0.013 | 0.011 | 1.1%    |
|      |             | 1        | 1      | 1                     | 1      | 1      | 1      | 1                | 1     | 1     | 1                    | 1     | 1     | 1      | 1               | 1     | 1     | 1            | 1     | 1     | 1       |

### S21.9 Tourism and Culture Office of Wonosobo Regency

| RANK | STAKEHOLDER | National |        | Central Java Province |        |        |        | Wonosobo Regency |       |       | Banjarnegara Regency |       |       |        | Local Community |       |       | User/Tourist |       |       | Everage |
|------|-------------|----------|--------|-----------------------|--------|--------|--------|------------------|-------|-------|----------------------|-------|-------|--------|-----------------|-------|-------|--------------|-------|-------|---------|
|      |             | S1       | S2     | S3                    | S4     | S5     | S6     | S7               | S8    | S10   | S11                  | S12   | S13   | S14    | S15             | S16   | S17   | S18          | S19   | S20   |         |
| 16   | S1          | 0.01379  | 0.0171 | 0.0148                | 0.018  | 0.014  | 0.0135 | 0.01             | 0.016 | 0.009 | 0.011                | 0.012 | 0.009 | 0.01   | 0.027           | 0.011 | 0.011 | 0.011        | 0.01  | 0.017 | 1.36%   |
| 14   | S2          | 0.01379  | 0.0171 | 0.0169                | 0.0205 | 0.0164 | 0.0162 | 0.013            | 0.019 | 0.013 | 0.014                | 0.014 | 0.014 | 0.0133 | 0.0135          | 0.022 | 0.023 | 0.022        | 0.021 | 0.033 | 1.77%   |
| 2    | S3          | 0.11034  | 0.1197 | 0.1182                | 0.0719 | 0.0982 | 0.1619 | 0.155            | 0.115 | 0.151 | 0.168                | 0.144 | 0.142 | 0.1596 | 0.1081          | 0.101 | 0.103 | 0.13         | 0.126 | 0.117 | 12.63%  |
| 1    | S4          | 0.11034  | 0.1197 | 0.2365                | 0.1437 | 0.0982 | 0.1619 | 0.155            | 0.115 | 0.151 | 0.168                | 0.144 | 0.142 | 0.1596 | 0.1081          | 0.101 | 0.103 | 0.13         | 0.126 | 0.117 | 13.63%  |
| 4    | S5          | 0.09655  | 0.1026 | 0.1182                | 0.1437 | 0.0982 | 0.081  | 0.103            | 0.058 | 0.113 | 0.112                | 0.072 | 0.114 | 0.1197 | 0.0946          | 0.09  | 0.091 | 0.108        | 0.105 | 0.1   | 10.11%  |
| 5    | S6          | 0.08276  | 0.0855 | 0.0591                | 0.0719 | 0.0982 | 0.081  | 0.052            | 0.115 | 0.075 | 0.056                | 0.144 | 0.085 | 0.0798 | 0.0811          | 0.079 | 0.08  | 0.087        | 0.084 | 0.083 | 8.31%   |
| 8    | S7          | 0.06897  | 0.0684 | 0.0394                | 0.0479 | 0.0491 | 0.081  | 0.052            | 0.058 | 0.038 | 0.028                | 0.072 | 0.057 | 0.0399 | 0.0676          | 0.067 | 0.069 | 0.065        | 0.063 | 0.067 | 5.77%   |
| 3    | S8          | 0.09655  | 0.1026 | 0.1182                | 0.1437 | 0.1964 | 0.081  | 0.103            | 0.115 | 0.113 | 0.112                | 0.072 | 0.114 | 0.1197 | 0.0946          | 0.09  | 0.091 | 0.108        | 0.105 | 0.1   | 10.93%  |
| 10   | S10         | 0.05517  | 0.0513 | 0.0296                | 0.0359 | 0.0327 | 0.0405 | 0.052            | 0.038 | 0.038 | 0.056                | 0.036 | 0.028 | 0.0199 | 0.0541          | 0.056 | 0.057 | 0.043        | 0.042 | 0.05  | 4.29%   |
| 7    | S11         | 0.06897  | 0.0684 | 0.0394                | 0.0479 | 0.0491 | 0.081  | 0.103            | 0.058 | 0.038 | 0.056                | 0.072 | 0.057 | 0.0399 | 0.0676          | 0.067 | 0.069 | 0.065        | 0.063 | 0.067 | 6.19%   |
| 6    | S12         | 0.08276  | 0.0855 | 0.0591                | 0.0719 | 0.0982 | 0.0405 | 0.052            | 0.115 | 0.075 | 0.056                | 0.072 | 0.085 | 0.0798 | 0.0811          | 0.079 | 0.08  | 0.087        | 0.084 | 0.083 | 7.72%   |
| 11   | S13         | 0.04138  | 0.0342 | 0.0236                | 0.0287 | 0.0245 | 0.027  | 0.026            | 0.029 | 0.038 | 0.028                | 0.024 | 0.028 | 0.0399 | 0.0405          | 0.045 | 0.046 | 0.022        | 0.021 | 0.033 | 3.15%   |
| 9    | S14         | 0.05517  | 0.0513 | 0.0296                | 0.0359 | 0.0327 | 0.0405 | 0.052            | 0.038 | 0.075 | 0.056                | 0.036 | 0.028 | 0.0399 | 0.0541          | 0.056 | 0.057 | 0.043        | 0.042 | 0.05  | 4.60%   |
| 17   | S15         | 0.0069   | 0.0171 | 0.0148                | 0.018  | 0.014  | 0.0135 | 0.01             | 0.016 | 0.009 | 0.011                | 0.012 | 0.009 | 0.01   | 0.0135          | 0.011 | 0.011 | 0.011        | 0.01  | 0.017 | 1.25%   |
| 19   | S16         | 0.01379  | 0.0085 | 0.0131                | 0.016  | 0.0123 | 0.0116 | 0.009            | 0.014 | 0.008 | 0.009                | 0.01  | 0.007 | 0.008  | 0.0135          | 0.011 | 0.006 | 0.007        | 0.007 | 0.008 | 1.02%   |
| 18   | S17         | 0.01379  | 0.0085 | 0.0131                | 0.016  | 0.0123 | 0.0116 | 0.009            | 0.014 | 0.008 | 0.009                | 0.01  | 0.007 | 0.008  | 0.0135          | 0.022 | 0.011 | 0.007        | 0.007 | 0.008 | 1.11%   |
| 12   | S18         | 0.02759  | 0.0171 | 0.0197                | 0.024  | 0.0196 | 0.0202 | 0.017            | 0.023 | 0.019 | 0.019                | 0.018 | 0.028 | 0.0199 | 0.027           | 0.034 | 0.034 | 0.022        | 0.042 | 0.017 | 2.36%   |
| 13   | S19         | 0.02759  | 0.0171 | 0.0197                | 0.024  | 0.0196 | 0.0202 | 0.017            | 0.023 | 0.019 | 0.019                | 0.018 | 0.028 | 0.0199 | 0.027           | 0.034 | 0.034 | 0.011        | 0.021 | 0.017 | 2.19%   |
| 15   | S20         | 0.01379  | 0.0085 | 0.0169                | 0.0205 | 0.0164 | 0.0162 | 0.013            | 0.019 | 0.013 | 0.014                | 0.014 | 0.014 | 0.0133 | 0.0135          | 0.022 | 0.023 | 0.022        | 0.021 | 0.017 | 1.64%   |
|      |             | 1        | 1      | 1                     | 1      | 1      | 1      | 1                | 1     | 1     | 1                    | 1     | 1     | 1      | 1               | 1     | 1     | 1            | 1     | 1     | 1       |

# S21.10 The Wonosobo Land Transportation Organization

| RANK | STAKEHOLDER | National |        | Central Java Province |        |        |        | Wonosobo Regency |       |       | Banjaregara Regency |       |       |        | Local Community |       |       | User/Tourist |       |       | Everage |
|------|-------------|----------|--------|-----------------------|--------|--------|--------|------------------|-------|-------|---------------------|-------|-------|--------|-----------------|-------|-------|--------------|-------|-------|---------|
|      |             | S1       | S2     | S3                    | S4     | S5     | S6     | S7               | S8    | S9    | S11                 | S12   | S13   | S14    | S15             | S16   | S17   | S18          | S19   | S20   |         |
| 10   | S1          | 0.03077  | 0.0232 | 0.0361                | 0.0315 | 0.03   | 0.0416 | 0.047            | 0.026 | 0.026 | 0.047               | 0.027 | 0.025 | 0.0287 | 0.0391          | 0.085 | 0.034 | 0.043        | 0.022 | 0.042 | 3.6%    |
| 12   | S2          | 0.03077  | 0.0232 | 0.0181                | 0.0252 | 0.025  | 0.0208 | 0.035            | 0.021 | 0.018 | 0.036               | 0.021 | 0.02  | 0.0192 | 0.0196          | 0.028 | 0.017 | 0.029        | 0.045 | 0.028 | 2.5%    |
| 14   | S3          | 0.01538  | 0.0232 | 0.0181                | 0.021  | 0.0215 | 0.0139 | 0.023            | 0.018 | 0.013 | 0.024               | 0.016 | 0.018 | 0.0144 | 0.013           | 0.014 | 0.052 | 0.014        | 0.022 | 0.014 | 1.9%    |
| 3    | S4          | 0.12308  | 0.1158 | 0.1084                | 0.126  | 0.1502 | 0.1247 | 0.093            | 0.212 | 0.106 | 0.095               | 0.082 | 0.123 | 0.1149 | 0.1173          | 0.114 | 0.103 | 0.101        | 0.112 | 0.099 | 11.7%   |
| 1    | S5          | 0.15385  | 0.139  | 0.1265                | 0.126  | 0.1502 | 0.1662 | 0.105            | 0.106 | 0.159 | 0.107               | 0.164 | 0.245 | 0.1724 | 0.1565          | 0.142 | 0.121 | 0.115        | 0.134 | 0.113 | 14.2%   |
| 8    | S6          | 0.03077  | 0.0463 | 0.0542                | 0.042  | 0.0375 | 0.0416 | 0.058            | 0.035 | 0.053 | 0.059               | 0.041 | 0.031 | 0.0575 | 0.0782          | 0.028 | 0.052 | 0.058        | 0.045 | 0.056 | 4.8%    |
| 19   | S7          | 0.00769  | 0.0077 | 0.009                 | 0.0158 | 0.0167 | 0.0083 | 0.012            | 0.013 | 0.009 | 0.006               | 0.012 | 0.014 | 0.0096 | 0.0078          | 0.007 | 0.009 | 0.014        | 0.007 | 0.014 | 1.0%    |
| 4    | S8          | 0.12308  | 0.1158 | 0.1084                | 0.063  | 0.1502 | 0.1247 | 0.093            | 0.106 | 0.106 | 0.095               | 0.082 | 0.123 | 0.1149 | 0.1173          | 0.114 | 0.103 | 0.101        | 0.112 | 0.099 | 10.8%   |
| 7    | S9          | 0.06154  | 0.0695 | 0.0723                | 0.063  | 0.0501 | 0.0416 | 0.07             | 0.053 | 0.053 | 0.071               | 0.082 | 0.041 | 0.0287 | 0.0391          | 0.057 | 0.069 | 0.072        | 0.067 | 0.07  | 6.0%    |
| 18   | S11         | 0.00769  | 0.0077 | 0.009                 | 0.0158 | 0.0167 | 0.0083 | 0.023            | 0.013 | 0.009 | 0.012               | 0.012 | 0.014 | 0.0096 | 0.0078          | 0.007 | 0.009 | 0.014        | 0.007 | 0.014 | 1.1%    |
| 5    | S12         | 0.09231  | 0.0927 | 0.0904                | 0.126  | 0.0751 | 0.0831 | 0.081            | 0.106 | 0.053 | 0.083               | 0.082 | 0.061 | 0.0575 | 0.0782          | 0.085 | 0.086 | 0.086        | 0.09  | 0.085 | 8.4%    |
| 2    | S13         | 0.15385  | 0.139  | 0.1265                | 0.126  | 0.0751 | 0.1662 | 0.105            | 0.106 | 0.159 | 0.107               | 0.164 | 0.123 | 0.1724 | 0.1565          | 0.142 | 0.121 | 0.115        | 0.134 | 0.113 | 13.2%   |
| 6    | S14         | 0.06154  | 0.0695 | 0.0723                | 0.063  | 0.0501 | 0.0416 | 0.07             | 0.053 | 0.106 | 0.071               | 0.082 | 0.041 | 0.0575 | 0.0391          | 0.057 | 0.069 | 0.072        | 0.067 | 0.07  | 6.4%    |
| 9    | S15         | 0.03077  | 0.0463 | 0.0542                | 0.042  | 0.0375 | 0.0208 | 0.058            | 0.035 | 0.053 | 0.059               | 0.041 | 0.031 | 0.0575 | 0.0391          | 0.028 | 0.052 | 0.058        | 0.045 | 0.056 | 4.4%    |
| 11   | S16         | 0.01026  | 0.0232 | 0.0361                | 0.0315 | 0.03   | 0.0416 | 0.047            | 0.026 | 0.026 | 0.047               | 0.027 | 0.025 | 0.0287 | 0.0391          | 0.028 | 0.034 | 0.043        | 0.022 | 0.042 | 3.2%    |
| 15   | S17         | 0.01538  | 0.0232 | 0.006                 | 0.021  | 0.0215 | 0.0139 | 0.023            | 0.018 | 0.013 | 0.024               | 0.016 | 0.018 | 0.0144 | 0.013           | 0.014 | 0.017 | 0.014        | 0.022 | 0.014 | 1.7%    |
| 16   | S18         | 0.01026  | 0.0116 | 0.0181                | 0.018  | 0.0188 | 0.0104 | 0.012            | 0.015 | 0.011 | 0.012               | 0.014 | 0.015 | 0.0115 | 0.0098          | 0.009 | 0.017 | 0.014        | 0.011 | 0.028 | 1.4%    |
| 13   | S19         | 0.03077  | 0.0116 | 0.0181                | 0.0252 | 0.025  | 0.0208 | 0.035            | 0.021 | 0.018 | 0.036               | 0.021 | 0.02  | 0.0192 | 0.0196          | 0.028 | 0.017 | 0.029        | 0.022 | 0.028 | 2.3%    |
| 17   | S20         | 0.01026  | 0.0116 | 0.0181                | 0.018  | 0.0188 | 0.0104 | 0.012            | 0.015 | 0.011 | 0.012               | 0.014 | 0.015 | 0.0115 | 0.0098          | 0.009 | 0.017 | 0.007        | 0.011 | 0.014 | 1.3%    |
|      |             | 1        | 1      | 1                     | 1      | 1      | 1      | 1                | 1     | 1     | 1                   | 1     | 1     | 1      | 1               | 1     | 1     | 1            | 1     | 1     | 1       |

# S21.11 Research and Development Planning Agency of Banjarnegara Regency

| RANK | STAKEHOLDER | National |        | Central Java Province |        |        |        | Wonosobo Regency |       |       |       | Banjarnegara Regency |       |        |        | Local Community |       |       | User/Tourist |       |       | Everage |
|------|-------------|----------|--------|-----------------------|--------|--------|--------|------------------|-------|-------|-------|----------------------|-------|--------|--------|-----------------|-------|-------|--------------|-------|-------|---------|
|      |             | S1       | S2     | S3                    | S4     | S5     | S6     | S7               | S8    | S9    | S10   | S12                  | S13   | S14    | S15    | S16             | S17   | S18   | S19          | S20   |       |         |
| 4    | S1          | 0.09899  | 0.1154 | 0.0581                | 0.1448 | 0.1189 | 0.1106 | 0.117            | 0.073 | 0.106 | 0.107 | 0.082                | 0.115 | 0.1107 | 0.1043 | 0.102           | 0.098 | 0.096 | 0.092        | 0.091 | 10.2% |         |
| 10   | S2          | 0.02475  | 0.0288 | 0.0291                | 0.029  | 0.0238 | 0.0553 | 0.039            | 0.024 | 0.026 | 0.021 | 0.027                | 0.029 | 0.0221 | 0.0348 | 0.034           | 0.042 | 0.041 | 0.046        | 0.045 | 3.3%  |         |
| 3    | S3          | 0.19797  | 0.1154 | 0.1162                | 0.1448 | 0.1189 | 0.1106 | 0.117            | 0.073 | 0.106 | 0.107 | 0.082                | 0.115 | 0.1107 | 0.1043 | 0.102           | 0.098 | 0.096 | 0.092        | 0.091 | 11.0% |         |
| 1    | S4          | 0.09899  | 0.1442 | 0.1162                | 0.1448 | 0.2379 | 0.1382 | 0.156            | 0.146 | 0.159 | 0.129 | 0.164                | 0.172 | 0.1328 | 0.1217 | 0.119           | 0.112 | 0.11  | 0.104        | 0.102 | 13.7% |         |
| 2    | S5          | 0.09899  | 0.1442 | 0.1162                | 0.0724 | 0.1189 | 0.1382 | 0.156            | 0.146 | 0.159 | 0.129 | 0.164                | 0.172 | 0.1328 | 0.1217 | 0.119           | 0.112 | 0.11  | 0.104        | 0.102 | 12.7% |         |
| 11   | S6          | 0.02475  | 0.0144 | 0.0291                | 0.029  | 0.0238 | 0.0276 | 0.039            | 0.024 | 0.026 | 0.021 | 0.027                | 0.029 | 0.0221 | 0.0348 | 0.034           | 0.042 | 0.041 | 0.046        | 0.045 | 3.1%  |         |
| 9    | S7          | 0.033    | 0.0288 | 0.0387                | 0.0362 | 0.0297 | 0.0276 | 0.039            | 0.037 | 0.053 | 0.043 | 0.041                | 0.057 | 0.0443 | 0.0522 | 0.051           | 0.056 | 0.055 | 0.058        | 0.057 | 4.4%  |         |
| 6    | S8          | 0.09899  | 0.0865 | 0.1162                | 0.0724 | 0.0595 | 0.0829 | 0.078            | 0.073 | 0.053 | 0.086 | 0.041                | 0.057 | 0.0886 | 0.087  | 0.085           | 0.084 | 0.082 | 0.081        | 0.08  | 7.9%  |         |
| 8    | S9          | 0.04949  | 0.0577 | 0.0581                | 0.0483 | 0.0396 | 0.0553 | 0.039            | 0.073 | 0.053 | 0.064 | 0.082                | 0.029 | 0.0664 | 0.0696 | 0.068           | 0.07  | 0.068 | 0.069        | 0.068 | 5.9%  |         |
| 13   | S10         | 0.0198   | 0.0288 | 0.0232                | 0.0241 | 0.0198 | 0.0276 | 0.02             | 0.018 | 0.018 | 0.021 | 0.021                | 0.019 | 0.0111 | 0.0174 | 0.017           | 0.028 | 0.027 | 0.035        | 0.034 | 2.3%  |         |
| 5    | S12         | 0.09899  | 0.0865 | 0.1162                | 0.0724 | 0.0595 | 0.0829 | 0.078            | 0.146 | 0.053 | 0.086 | 0.082                | 0.057 | 0.0886 | 0.087  | 0.085           | 0.084 | 0.082 | 0.081        | 0.08  | 8.5%  |         |
| 7    | S13         | 0.04949  | 0.0577 | 0.0581                | 0.0483 | 0.0396 | 0.0553 | 0.039            | 0.073 | 0.106 | 0.064 | 0.082                | 0.057 | 0.0664 | 0.0696 | 0.068           | 0.07  | 0.068 | 0.069        | 0.068 | 6.4%  |         |
| 12   | S14         | 0.0198   | 0.0288 | 0.0232                | 0.0241 | 0.0198 | 0.0276 | 0.02             | 0.018 | 0.018 | 0.043 | 0.021                | 0.019 | 0.0221 | 0.0174 | 0.017           | 0.028 | 0.027 | 0.035        | 0.034 | 2.4%  |         |
| 14   | S15         | 0.0165   | 0.0144 | 0.0194                | 0.0207 | 0.017  | 0.0138 | 0.013            | 0.015 | 0.013 | 0.021 | 0.016                | 0.014 | 0.0221 | 0.0174 | 0.034           | 0.014 | 0.014 | 0.023        | 0.023 | 1.8%  |         |
| 15   | S16         | 0.0165   | 0.0144 | 0.0194                | 0.0207 | 0.017  | 0.0138 | 0.013            | 0.015 | 0.013 | 0.021 | 0.016                | 0.014 | 0.0221 | 0.0087 | 0.017           | 0.014 | 0.014 | 0.023        | 0.023 | 1.7%  |         |
| 16   | S17         | 0.01414  | 0.0096 | 0.0166                | 0.0181 | 0.0149 | 0.0092 | 0.01             | 0.012 | 0.011 | 0.011 | 0.014                | 0.011 | 0.0111 | 0.0174 | 0.017           | 0.014 | 0.027 | 0.012        | 0.011 | 1.4%  |         |
| 17   | S18         | 0.01414  | 0.0096 | 0.0166                | 0.0181 | 0.0149 | 0.0092 | 0.01             | 0.012 | 0.011 | 0.011 | 0.014                | 0.011 | 0.0111 | 0.0174 | 0.017           | 0.007 | 0.014 | 0.012        | 0.011 | 1.3%  |         |
| 18   | S19         | 0.01237  | 0.0072 | 0.0145                | 0.0161 | 0.0132 | 0.0069 | 0.008            | 0.01  | 0.009 | 0.007 | 0.012                | 0.01  | 0.0074 | 0.0087 | 0.008           | 0.014 | 0.014 | 0.012        | 0.023 | 1.1%  |         |
| 19   | S20         | 0.01237  | 0.0072 | 0.0145                | 0.0161 | 0.0132 | 0.0069 | 0.008            | 0.01  | 0.009 | 0.007 | 0.012                | 0.01  | 0.0074 | 0.0087 | 0.008           | 0.014 | 0.014 | 0.006        | 0.011 | 1.0%  |         |
|      |             | 1        | 1      | 1                     | 1      | 1      | 1      | 1                | 1     | 1     | 1     | 1                    | 1     | 1      | 1      | 1               | 1     | 1     | 1            | 1     | 1     |         |

S21.12 Transportation Office of Banjarnegara Regency

| RANK | STAKEHOLDER | National |        | Central Java Province |        |        |        | Wonosobo Regency |       |       |       | Banjarnegara Regency |       |        | Local Community |       |       | User/Tourist |       |       | Everage |
|------|-------------|----------|--------|-----------------------|--------|--------|--------|------------------|-------|-------|-------|----------------------|-------|--------|-----------------|-------|-------|--------------|-------|-------|---------|
|      |             | S1       | S2     | S3                    | S4     | S5     | S6     | S7               | S8    | S9    | S10   | S11                  | S13   | S14    | S15             | S16   | S17   | S18          | S19   | S20   |         |
| 6    | S1          | 0.07121  | 0.0731 | 0.071                 | 0.0585 | 0.097  | 0.1135 | 0.077            | 0.085 | 0.081 | 0.085 | 0.04                 | 0.055 | 0.0507 | 0.0828          | 0.083 | 0.081 | 0.081        | 0.079 | 0.078 | 7.6%    |
| 10   | S2          | 0.03561  | 0.0365 | 0.0355                | 0.0293 | 0.0323 | 0.0378 | 0.019            | 0.028 | 0.027 | 0.043 | 0.04                 | 0.055 | 0.0507 | 0.0414          | 0.05  | 0.048 | 0.054        | 0.053 | 0.056 | 4.1%    |
| 1    | S3          | 0.14242  | 0.1462 | 0.1419                | 0.234  | 0.097  | 0.1135 | 0.155            | 0.141 | 0.135 | 0.128 | 0.159                | 0.165 | 0.152  | 0.1241          | 0.116 | 0.113 | 0.107        | 0.105 | 0.101 | 13.6%   |
| 2    | S4          | 0.14242  | 0.1462 | 0.071                 | 0.117  | 0.097  | 0.1135 | 0.155            | 0.141 | 0.135 | 0.128 | 0.159                | 0.165 | 0.152  | 0.1241          | 0.116 | 0.113 | 0.107        | 0.105 | 0.101 | 12.6%   |
| 4    | S5          | 0.07121  | 0.1096 | 0.1419                | 0.117  | 0.097  | 0.0567 | 0.116            | 0.113 | 0.108 | 0.107 | 0.08                 | 0.11  | 0.1014 | 0.1034          | 0.099 | 0.097 | 0.094        | 0.092 | 0.089 | 10.0%   |
| 3    | S6          | 0.07121  | 0.1096 | 0.1419                | 0.117  | 0.194  | 0.1135 | 0.116            | 0.113 | 0.108 | 0.107 | 0.08                 | 0.11  | 0.1014 | 0.1034          | 0.099 | 0.097 | 0.094        | 0.092 | 0.089 | 10.8%   |
| 9    | S7          | 0.03561  | 0.0731 | 0.0355                | 0.0293 | 0.0323 | 0.0378 | 0.039            | 0.028 | 0.027 | 0.043 | 0.04                 | 0.055 | 0.0507 | 0.0414          | 0.05  | 0.048 | 0.054        | 0.053 | 0.056 | 4.4%    |
| 11   | S8          | 0.02374  | 0.0365 | 0.0284                | 0.0234 | 0.0242 | 0.0284 | 0.039            | 0.028 | 0.054 | 0.021 | 0.027                | 0.027 | 0.0253 | 0.0207          | 0.033 | 0.032 | 0.04         | 0.039 | 0.045 | 3.1%    |
| 12   | S9          | 0.02374  | 0.0365 | 0.0284                | 0.0234 | 0.0242 | 0.0284 | 0.039            | 0.014 | 0.027 | 0.021 | 0.027                | 0.027 | 0.0253 | 0.0207          | 0.033 | 0.032 | 0.04         | 0.039 | 0.045 | 2.9%    |
| 13   | S10         | 0.0178   | 0.0183 | 0.0237                | 0.0195 | 0.0194 | 0.0227 | 0.019            | 0.028 | 0.027 | 0.021 | 0.02                 | 0.018 | 0.0169 | 0.0414          | 0.017 | 0.016 | 0.027        | 0.026 | 0.034 | 2.3%    |
| 5    | S11         | 0.14242  | 0.0731 | 0.071                 | 0.0585 | 0.097  | 0.1135 | 0.077            | 0.085 | 0.081 | 0.085 | 0.08                 | 0.055 | 0.0507 | 0.0828          | 0.083 | 0.081 | 0.081        | 0.079 | 0.078 | 8.2%    |
| 7    | S13         | 0.07121  | 0.0365 | 0.0473                | 0.039  | 0.0485 | 0.0567 | 0.039            | 0.056 | 0.054 | 0.064 | 0.08                 | 0.055 | 0.1014 | 0.0621          | 0.066 | 0.065 | 0.067        | 0.066 | 0.067 | 6.0%    |
| 8    | S14         | 0.07121  | 0.0365 | 0.0473                | 0.039  | 0.0485 | 0.0567 | 0.039            | 0.056 | 0.054 | 0.064 | 0.08                 | 0.027 | 0.0507 | 0.0621          | 0.066 | 0.065 | 0.067        | 0.066 | 0.067 | 5.6%    |
| 14   | S15         | 0.0178   | 0.0183 | 0.0237                | 0.0195 | 0.0194 | 0.0227 | 0.019            | 0.028 | 0.027 | 0.011 | 0.02                 | 0.018 | 0.0169 | 0.0207          | 0.017 | 0.016 | 0.027        | 0.026 | 0.034 | 2.1%    |
| 15   | S16         | 0.01424  | 0.0122 | 0.0203                | 0.0167 | 0.0162 | 0.0189 | 0.013            | 0.014 | 0.014 | 0.021 | 0.016                | 0.014 | 0.0127 | 0.0207          | 0.017 | 0.016 | 0.013        | 0.013 | 0.022 | 1.6%    |
| 16   | S17         | 0.01424  | 0.0122 | 0.0203                | 0.0167 | 0.0162 | 0.0189 | 0.013            | 0.014 | 0.014 | 0.021 | 0.016                | 0.014 | 0.0127 | 0.0207          | 0.017 | 0.016 | 0.013        | 0.013 | 0.006 | 1.5%    |
| 17   | S18         | 0.01187  | 0.0091 | 0.0177                | 0.0146 | 0.0139 | 0.0162 | 0.01             | 0.009 | 0.009 | 0.011 | 0.013                | 0.011 | 0.0101 | 0.0103          | 0.017 | 0.016 | 0.013        | 0.026 | 0.011 | 1.3%    |
| 18   | S19         | 0.01187  | 0.0091 | 0.0177                | 0.0146 | 0.0139 | 0.0162 | 0.01             | 0.009 | 0.009 | 0.011 | 0.013                | 0.011 | 0.0101 | 0.0103          | 0.017 | 0.016 | 0.007        | 0.013 | 0.011 | 1.2%    |
| 19   | S20         | 0.01017  | 0.0073 | 0.0158                | 0.013  | 0.0121 | 0.0142 | 0.008            | 0.007 | 0.007 | 0.007 | 0.011                | 0.009 | 0.0084 | 0.0069          | 0.008 | 0.032 | 0.013        | 0.013 | 0.011 | 1.1%    |
|      |             | 1        | 1      | 1                     | 1      | 1      | 1      | 1                | 1     | 1     | 1     | 1                    | 1     | 1      | 1               | 1     | 1     | 1            | 1     | 1     | 1       |

S21.13 Tourism and Culture Office of Banjarnegara Regency

| RANK | STAKEHOLDER | National |        | Central Java Province |        |        |        | Wonosobo Regency |       |       |       | Banjarnegara Regency |       |        |        | Local Community |       |       | User/Tourist |       |       | Everage |
|------|-------------|----------|--------|-----------------------|--------|--------|--------|------------------|-------|-------|-------|----------------------|-------|--------|--------|-----------------|-------|-------|--------------|-------|-------|---------|
|      |             | S1       | S2     | S3                    | S4     | S5     | S6     | S7               | S8    | S9    | S10   | S11                  | S12   | S14    | S15    | S16             | S17   | S18   | S19          | S20   |       |         |
| 15   | S1          | 0.01667  | 0.0325 | 0.0167                | 0.0203 | 0.0162 | 0.0142 | 0.013            | 0.014 | 0.014 | 0.012 | 0.019                | 0.016 | 0.0127 | 0.0134 | 0.013           | 0.022 | 0.013 | 0.021        | 0.021 | 1.7%  |         |
| 16   | S2          | 0.00833  | 0.0163 | 0.0167                | 0.0203 | 0.0162 | 0.0142 | 0.013            | 0.014 | 0.014 | 0.012 | 0.019                | 0.016 | 0.0127 | 0.0134 | 0.013           | 0.022 | 0.013 | 0.021        | 0.021 | 1.6%  |         |
| 2    | S3          | 0.11667  | 0.1138 | 0.117                 | 0.071  | 0.097  | 0.1424 | 0.155            | 0.165 | 0.142 | 0.146 | 0.113                | 0.159 | 0.152  | 0.1074 | 0.105           | 0.099 | 0.132 | 0.128        | 0.124 | 12.6% |         |
| 1    | S4          | 0.11667  | 0.1138 | 0.234                 | 0.1419 | 0.097  | 0.1424 | 0.155            | 0.165 | 0.142 | 0.146 | 0.113                | 0.159 | 0.152  | 0.1074 | 0.105           | 0.099 | 0.132 | 0.128        | 0.124 | 13.5% |         |
| 4    | S5          | 0.1      | 0.0976 | 0.117                 | 0.1419 | 0.097  | 0.0712 | 0.116            | 0.11  | 0.113 | 0.11  | 0.057                | 0.08  | 0.1014 | 0.094  | 0.092           | 0.088 | 0.105 | 0.107        | 0.103 | 10.0% |         |
| 6    | S6          | 0.08333  | 0.0813 | 0.0585                | 0.071  | 0.097  | 0.0712 | 0.077            | 0.055 | 0.085 | 0.073 | 0.113                | 0.04  | 0.0507 | 0.0805 | 0.079           | 0.077 | 0.079 | 0.085        | 0.083 | 7.6%  |         |
| 9    | S7          | 0.05     | 0.0488 | 0.0293                | 0.0355 | 0.0323 | 0.0356 | 0.039            | 0.055 | 0.028 | 0.073 | 0.038                | 0.04  | 0.0507 | 0.0537 | 0.053           | 0.055 | 0.026 | 0.043        | 0.041 | 4.3%  |         |
| 7    | S8          | 0.06667  | 0.065  | 0.039                 | 0.0473 | 0.0485 | 0.0712 | 0.039            | 0.055 | 0.057 | 0.037 | 0.057                | 0.08  | 0.1014 | 0.0671 | 0.066           | 0.066 | 0.053 | 0.064        | 0.062 | 6.0%  |         |
| 11   | S9          | 0.03333  | 0.0325 | 0.0234                | 0.0284 | 0.0242 | 0.0237 | 0.039            | 0.027 | 0.028 | 0.037 | 0.028                | 0.027 | 0.0253 | 0.0403 | 0.039           | 0.044 | 0.079 | 0.021        | 0.021 | 3.3%  |         |
| 10   | S10         | 0.05     | 0.0488 | 0.0293                | 0.0355 | 0.0323 | 0.0356 | 0.019            | 0.055 | 0.028 | 0.037 | 0.038                | 0.04  | 0.0507 | 0.0537 | 0.053           | 0.055 | 0.026 | 0.043        | 0.041 | 4.1%  |         |
| 3    | S11         | 0.1      | 0.0976 | 0.117                 | 0.1419 | 0.194  | 0.0712 | 0.116            | 0.11  | 0.113 | 0.11  | 0.113                | 0.08  | 0.1014 | 0.094  | 0.092           | 0.088 | 0.105 | 0.107        | 0.103 | 10.8% |         |
| 5    | S12         | 0.08333  | 0.0813 | 0.0585                | 0.071  | 0.097  | 0.1424 | 0.077            | 0.055 | 0.085 | 0.073 | 0.113                | 0.08  | 0.0507 | 0.0805 | 0.079           | 0.077 | 0.079 | 0.085        | 0.083 | 8.2%  |         |
| 8    | S14         | 0.06667  | 0.065  | 0.039                 | 0.0473 | 0.0485 | 0.0712 | 0.039            | 0.027 | 0.057 | 0.037 | 0.057                | 0.08  | 0.0507 | 0.0671 | 0.066           | 0.066 | 0.053 | 0.064        | 0.062 | 5.6%  |         |
| 17   | S15         | 0.01667  | 0.0163 | 0.0146                | 0.0177 | 0.0139 | 0.0119 | 0.01             | 0.011 | 0.009 | 0.009 | 0.016                | 0.013 | 0.0101 | 0.0134 | 0.026           | 0.011 | 0.009 | 0.011        | 0.01  | 1.3%  |         |
| 18   | S16         | 0.01667  | 0.0163 | 0.0146                | 0.0177 | 0.0139 | 0.0119 | 0.01             | 0.011 | 0.009 | 0.009 | 0.016                | 0.013 | 0.0101 | 0.0067 | 0.013           | 0.011 | 0.009 | 0.011        | 0.01  | 1.2%  |         |
| 19   | S17         | 0.00833  | 0.0081 | 0.013                 | 0.0158 | 0.0121 | 0.0102 | 0.008            | 0.009 | 0.007 | 0.007 | 0.014                | 0.011 | 0.0084 | 0.0134 | 0.013           | 0.011 | 0.007 | 0.007        | 0.007 | 1.0%  |         |
| 12   | S18         | 0.03333  | 0.0325 | 0.0234                | 0.0284 | 0.0242 | 0.0237 | 0.039            | 0.027 | 0.009 | 0.037 | 0.028                | 0.027 | 0.0253 | 0.0403 | 0.039           | 0.044 | 0.026 | 0.021        | 0.021 | 2.9%  |         |
| 13   | S19         | 0.01667  | 0.0163 | 0.0195                | 0.0237 | 0.0194 | 0.0178 | 0.019            | 0.018 | 0.028 | 0.018 | 0.023                | 0.02  | 0.0169 | 0.0268 | 0.026           | 0.033 | 0.026 | 0.021        | 0.041 | 2.3%  |         |
| 14   | S20         | 0.01667  | 0.0163 | 0.0195                | 0.0237 | 0.0194 | 0.0178 | 0.019            | 0.018 | 0.028 | 0.018 | 0.023                | 0.02  | 0.0169 | 0.0268 | 0.026           | 0.033 | 0.026 | 0.011        | 0.021 | 2.1%  |         |
|      |             | 1        | 1      | 1                     | 1      | 1      | 1      | 1                | 1     | 1     | 1     | 1                    | 1     | 1      | 1      | 1               | 1     | 1     | 1            | 1     | 1     |         |

# S21.14 Land Transportation Organization Banjarnegara

| RANK | STAKEHOLDER | National |        | Central Java Province |        |        |        | Wonosobo Regency |       |       |       | Banjarnegara Regency |       |        |        | Local Community |       |       | User/Tourist |       |       | Everage |
|------|-------------|----------|--------|-----------------------|--------|--------|--------|------------------|-------|-------|-------|----------------------|-------|--------|--------|-----------------|-------|-------|--------------|-------|-------|---------|
|      |             | S1       | S2     | S3                    | S4     | S5     | S6     | S7               | S8    | S9    | S10   | S11                  | S12   | S13    | S15    | S16             | S17   | S18   | S19          | S20   |       |         |
| 7    | S1          | 0.0546   | 0.0545 | 0.0707                | 0.0564 | 0.079  | 0.0569 | 0.1              | 0.048 | 0.037 | 0.065 | 0.065                | 0.047 | 0.0656 | 0.0569 | 0.039           | 0.035 | 0.065 | 0.064        | 0.08  | 6.0%  |         |
| 13   | S2          | 0.0273   | 0.0273 | 0.0236                | 0.0282 | 0.0263 | 0.0142 | 0.025            | 0.024 | 0.037 | 0.039 | 0.032                | 0.028 | 0.0437 | 0.0284 | 0.023           | 0.035 | 0.043 | 0.038        | 0.027 | 3.0%  |         |
| 6    | S3          | 0.0546   | 0.0818 | 0.0707                | 0.1128 | 0.0395 | 0.0853 | 0.05             | 0.096 | 0.075 | 0.078 | 0.081                | 0.071 | 0.0765 | 0.0853 | 0.058           | 0.071 | 0.075 | 0.077        | 0.08  | 7.5%  |         |
| 3    | S4          | 0.10919  | 0.1091 | 0.0707                | 0.1128 | 0.079  | 0.1137 | 0.1              | 0.193 | 0.112 | 0.092 | 0.097                | 0.141 | 0.0874 | 0.1137 | 0.117           | 0.106 | 0.086 | 0.09         | 0.106 | 10.7% |         |
| 5    | S5          | 0.0546   | 0.0818 | 0.1413                | 0.1128 | 0.079  | 0.0853 | 0.05             | 0.096 | 0.075 | 0.078 | 0.081                | 0.071 | 0.0765 | 0.0853 | 0.058           | 0.071 | 0.075 | 0.077        | 0.08  | 8.0%  |         |
| 11   | S6          | 0.0273   | 0.0545 | 0.0236                | 0.0282 | 0.0263 | 0.0284 | 0.025            | 0.024 | 0.037 | 0.039 | 0.032                | 0.028 | 0.0437 | 0.0284 | 0.023           | 0.035 | 0.043 | 0.038        | 0.027 | 3.2%  |         |
| 8    | S7          | 0.0273   | 0.0545 | 0.0707                | 0.0564 | 0.079  | 0.0569 | 0.05             | 0.048 | 0.037 | 0.065 | 0.065                | 0.047 | 0.0656 | 0.0569 | 0.039           | 0.035 | 0.065 | 0.064        | 0.053 | 5.5%  |         |
| 4    | S8          | 0.10919  | 0.1091 | 0.0707                | 0.0564 | 0.079  | 0.1137 | 0.1              | 0.096 | 0.112 | 0.092 | 0.097                | 0.141 | 0.0874 | 0.1137 | 0.117           | 0.106 | 0.086 | 0.09         | 0.106 | 9.9%  |         |
| 9    | S9          | 0.0546   | 0.0273 | 0.0353                | 0.0376 | 0.0395 | 0.0284 | 0.05             | 0.032 | 0.037 | 0.052 | 0.048                | 0.035 | 0.0546 | 0.0284 | 0.029           | 0.071 | 0.054 | 0.051        | 0.027 | 4.2%  |         |
| 16   | S10         | 0.01092  | 0.0091 | 0.0118                | 0.0161 | 0.0132 | 0.0095 | 0.01             | 0.014 | 0.009 | 0.013 | 0.016                | 0.018 | 0.0109 | 0.0095 | 0.015           | 0.009 | 0.011 | 0.026        | 0.009 | 1.3%  |         |
| 15   | S11         | 0.01365  | 0.0136 | 0.0141                | 0.0188 | 0.0158 | 0.0142 | 0.013            | 0.016 | 0.012 | 0.013 | 0.016                | 0.02  | 0.0219 | 0.0142 | 0.017           | 0.012 | 0.022 | 0.013        | 0.013 | 1.5%  |         |
| 1    | S12         | 0.16379  | 0.1364 | 0.1413                | 0.1128 | 0.1581 | 0.1422 | 0.15             | 0.096 | 0.15  | 0.105 | 0.113                | 0.141 | 0.0984 | 0.1422 | 0.233           | 0.142 | 0.097 | 0.103        | 0.133 | 13.5% |         |
| 18   | S13         | 0.0091   | 0.0068 | 0.0101                | 0.0141 | 0.0113 | 0.0071 | 0.008            | 0.012 | 0.007 | 0.013 | 0.008                | 0.016 | 0.0109 | 0.0071 | 0.013           | 0.007 | 0.022 | 0.013        | 0.007 | 1.1%  |         |
| 12   | S15         | 0.0273   | 0.0273 | 0.0236                | 0.0282 | 0.0263 | 0.0284 | 0.025            | 0.024 | 0.037 | 0.039 | 0.032                | 0.028 | 0.0437 | 0.0284 | 0.023           | 0.035 | 0.043 | 0.038        | 0.053 | 3.2%  |         |
| 2    | S16         | 0.16379  | 0.1364 | 0.1413                | 0.1128 | 0.1581 | 0.1422 | 0.15             | 0.096 | 0.15  | 0.105 | 0.113                | 0.071 | 0.0984 | 0.1422 | 0.117           | 0.142 | 0.097 | 0.103        | 0.133 | 12.5% |         |
| 10   | S17         | 0.0546   | 0.0273 | 0.0353                | 0.0376 | 0.0395 | 0.0284 | 0.05             | 0.032 | 0.019 | 0.052 | 0.048                | 0.035 | 0.0546 | 0.0284 | 0.029           | 0.035 | 0.054 | 0.051        | 0.027 | 3.9%  |         |
| 19   | S18         | 0.0091   | 0.0068 | 0.0101                | 0.0141 | 0.0113 | 0.0071 | 0.008            | 0.012 | 0.007 | 0.013 | 0.008                | 0.016 | 0.0055 | 0.0071 | 0.013           | 0.007 | 0.011 | 0.013        | 0.007 | 1.0%  |         |
| 17   | S19         | 0.01092  | 0.0091 | 0.0118                | 0.0161 | 0.0132 | 0.0095 | 0.01             | 0.014 | 0.009 | 0.007 | 0.016                | 0.018 | 0.0109 | 0.0095 | 0.015           | 0.009 | 0.011 | 0.013        | 0.009 | 1.2%  |         |
| 14   | S20         | 0.0182   | 0.0273 | 0.0236                | 0.0282 | 0.0263 | 0.0284 | 0.025            | 0.024 | 0.037 | 0.039 | 0.032                | 0.028 | 0.0437 | 0.0142 | 0.023           | 0.035 | 0.043 | 0.038        | 0.027 | 3.0%  |         |
|      |             | 1        | 1      | 1                     | 1      | 1      | 1      | 1                | 1     | 1     | 1     | 1                    | 1     | 1      | 1      | 1               | 1     | 1     | 1            | 1     | 1     |         |

S21.15 Pokdarwis Dieng Pandhawa

| RANK | STAKEHOLDER | National |        | Central Java Province |        |        |        | Wonosobo Regency |       |       |       | Banjarnegara Regency |       |        |        | Local Community |       | User/Tourist |       |       | Everage |
|------|-------------|----------|--------|-----------------------|--------|--------|--------|------------------|-------|-------|-------|----------------------|-------|--------|--------|-----------------|-------|--------------|-------|-------|---------|
|      |             | S1       | S2     | S3                    | S4     | S5     | S6     | S7               | S8    | S9    | S10   | S11                  | S12   | S13    | S14    | S16             | S17   | S18          | S19   | S20   |         |
| 4    | S1          | 0.09699  | 0.0797 | 0.0567                | 0.1419 | 0.117  | 0.1084 | 0.1              | 0.107 | 0.113 | 0.103 | 0.11                 | 0.116 | 0.1014 | 0.0976 | 0.071           | 0.11  | 0.092        | 0.094 | 0.088 | 10.0%   |
| 5    | S2          | 0.09699  | 0.0797 | 0.1135                | 0.071  | 0.0585 | 0.0813 | 0.083            | 0.085 | 0.085 | 0.083 | 0.073                | 0.077 | 0.0507 | 0.0813 | 0.142           | 0.055 | 0.079        | 0.081 | 0.077 | 8.2%    |
| 3    | S3          | 0.19397  | 0.0797 | 0.1135                | 0.1419 | 0.117  | 0.1084 | 0.1              | 0.107 | 0.113 | 0.103 | 0.11                 | 0.116 | 0.1014 | 0.0976 | 0.071           | 0.11  | 0.092        | 0.094 | 0.088 | 10.8%   |
| 1    | S4          | 0.09699  | 0.1595 | 0.1135                | 0.1419 | 0.234  | 0.1354 | 0.117            | 0.128 | 0.141 | 0.124 | 0.146                | 0.155 | 0.152  | 0.1138 | 0.142           | 0.165 | 0.105        | 0.107 | 0.099 | 13.6%   |
| 2    | S5          | 0.09699  | 0.1595 | 0.1135                | 0.071  | 0.117  | 0.1354 | 0.117            | 0.128 | 0.141 | 0.124 | 0.146                | 0.155 | 0.152  | 0.1138 | 0.142           | 0.165 | 0.105        | 0.107 | 0.099 | 12.6%   |
| 12   | S6          | 0.02425  | 0.0266 | 0.0284                | 0.0284 | 0.0234 | 0.0271 | 0.033            | 0.021 | 0.014 | 0.021 | 0.037                | 0.039 | 0.0253 | 0.0325 | 0.024           | 0.027 | 0.039        | 0.04  | 0.044 | 2.9%    |
| 15   | S7          | 0.01616  | 0.0159 | 0.0189                | 0.0203 | 0.0167 | 0.0135 | 0.017            | 0.021 | 0.014 | 0.021 | 0.012                | 0.013 | 0.0127 | 0.0325 | 0.014           | 0.014 | 0.013        | 0.013 | 0.022 | 1.7%    |
| 13   | S8          | 0.0194   | 0.0199 | 0.0227                | 0.0237 | 0.0195 | 0.0271 | 0.017            | 0.021 | 0.028 | 0.041 | 0.018                | 0.019 | 0.0169 | 0.0163 | 0.018           | 0.018 | 0.026        | 0.027 | 0.033 | 2.3%    |
| 11   | S9          | 0.02425  | 0.0266 | 0.0284                | 0.0284 | 0.0234 | 0.0542 | 0.033            | 0.021 | 0.028 | 0.021 | 0.037                | 0.039 | 0.0253 | 0.0325 | 0.024           | 0.027 | 0.039        | 0.04  | 0.044 | 3.1%    |
| 14   | S10         | 0.0194   | 0.0199 | 0.0227                | 0.0237 | 0.0195 | 0.0271 | 0.017            | 0.011 | 0.028 | 0.021 | 0.018                | 0.019 | 0.0169 | 0.0163 | 0.018           | 0.018 | 0.026        | 0.027 | 0.033 | 2.1%    |
| 10   | S11         | 0.03233  | 0.0399 | 0.0378                | 0.0355 | 0.0293 | 0.0271 | 0.05             | 0.043 | 0.028 | 0.041 | 0.037                | 0.019 | 0.0507 | 0.0488 | 0.036           | 0.055 | 0.053        | 0.054 | 0.055 | 4.1%    |
| 9    | S12         | 0.03233  | 0.0399 | 0.0378                | 0.0355 | 0.0293 | 0.0271 | 0.05             | 0.043 | 0.028 | 0.041 | 0.073                | 0.039 | 0.0507 | 0.0488 | 0.036           | 0.055 | 0.053        | 0.054 | 0.055 | 4.4%    |
| 8    | S13         | 0.04849  | 0.0797 | 0.0567                | 0.0473 | 0.039  | 0.0542 | 0.067            | 0.064 | 0.056 | 0.062 | 0.037                | 0.039 | 0.0507 | 0.065  | 0.071           | 0.027 | 0.066        | 0.067 | 0.066 | 5.6%    |
| 16   | S14         | 0.01616  | 0.0159 | 0.0189                | 0.0203 | 0.0167 | 0.0135 | 0.008            | 0.021 | 0.014 | 0.021 | 0.012                | 0.013 | 0.0127 | 0.0163 | 0.014           | 0.014 | 0.013        | 0.013 | 0.022 | 1.6%    |
| 6    | S16         | 0.09699  | 0.0399 | 0.1135                | 0.071  | 0.0585 | 0.0813 | 0.083            | 0.085 | 0.085 | 0.083 | 0.073                | 0.077 | 0.0507 | 0.0813 | 0.071           | 0.055 | 0.079        | 0.081 | 0.077 | 7.6%    |
| 7    | S17         | 0.04849  | 0.0797 | 0.0567                | 0.0473 | 0.039  | 0.0542 | 0.067            | 0.064 | 0.056 | 0.062 | 0.037                | 0.039 | 0.1014 | 0.065  | 0.071           | 0.055 | 0.066        | 0.067 | 0.066 | 6.0%    |
| 18   | S18         | 0.01386  | 0.0133 | 0.0162                | 0.0177 | 0.0146 | 0.009  | 0.017            | 0.011 | 0.009 | 0.01  | 0.009                | 0.01  | 0.0101 | 0.0163 | 0.012           | 0.011 | 0.013        | 0.007 | 0.011 | 1.2%    |
| 17   | S19         | 0.01386  | 0.0133 | 0.0162                | 0.0177 | 0.0146 | 0.009  | 0.017            | 0.011 | 0.009 | 0.01  | 0.009                | 0.01  | 0.0101 | 0.0163 | 0.012           | 0.011 | 0.026        | 0.013 | 0.011 | 1.3%    |
| 19   | S20         | 0.01212  | 0.0114 | 0.0142                | 0.0158 | 0.013  | 0.0068 | 0.008            | 0.007 | 0.007 | 0.007 | 0.007                | 0.008 | 0.0084 | 0.0081 | 0.01            | 0.009 | 0.013        | 0.013 | 0.011 | 1.0%    |
|      |             | 1        | 1      | 1                     | 1      | 1      | 1      | 1                | 1     | 1     | 1     | 1                    | 1     | 1      | 1      | 1               | 1     | 1            | 1     | 1     | 1       |



S21.16 Pokdarwis Dieng Kulon

| RANK | STAKEHOLDER | National |        | Central Java Province |        |        |        | Wonosobo Regency |       |       |       | Banjarnegara Regency |       |        |        | Local Community |       | User/Tourist |       |       | Everage |
|------|-------------|----------|--------|-----------------------|--------|--------|--------|------------------|-------|-------|-------|----------------------|-------|--------|--------|-----------------|-------|--------------|-------|-------|---------|
|      |             | S1       | S2     | S3                    | S4     | S5     | S6     | S7               | S8    | S9    | S10   | S11                  | S12   | S13    | S14    | S15             | S17   | S18          | S19   | S20   |         |
| 2    | S1          | 0.117    | 0.097  | 0.071                 | 0.1135 | 0.1533 | 0.1462 | 0.155            | 0.128 | 0.141 | 0.124 | 0.153                | 0.152 | 0.1645 | 0.1354 | 0.117           | 0.114 | 0.107        | 0.108 | 0.099 | 12.6%   |
| 4    | S2          | 0.117    | 0.097  | 0.1419                | 0.0567 | 0.0767 | 0.1096 | 0.116            | 0.107 | 0.113 | 0.103 | 0.076                | 0.101 | 0.1097 | 0.1084 | 0.1             | 0.098 | 0.093        | 0.095 | 0.088 | 10.0%   |
| 1    | S3          | 0.23401  | 0.097  | 0.1419                | 0.1135 | 0.1533 | 0.1462 | 0.155            | 0.128 | 0.141 | 0.124 | 0.153                | 0.152 | 0.1645 | 0.1354 | 0.117           | 0.114 | 0.107        | 0.108 | 0.099 | 13.6%   |
| 3    | S4          | 0.117    | 0.194  | 0.1419                | 0.1135 | 0.0767 | 0.1096 | 0.116            | 0.107 | 0.113 | 0.103 | 0.076                | 0.101 | 0.1097 | 0.1084 | 0.1             | 0.098 | 0.093        | 0.095 | 0.088 | 10.8%   |
| 5    | S5          | 0.0585   | 0.097  | 0.071                 | 0.1135 | 0.0767 | 0.0731 | 0.077            | 0.085 | 0.085 | 0.083 | 0.076                | 0.051 | 0.0548 | 0.0813 | 0.083           | 0.081 | 0.08         | 0.081 | 0.077 | 7.8%    |
| 10   | S6          | 0.02925  | 0.0323 | 0.0355                | 0.0378 | 0.0383 | 0.0365 | 0.019            | 0.043 | 0.028 | 0.041 | 0.038                | 0.051 | 0.0548 | 0.0271 | 0.05            | 0.049 | 0.053        | 0.054 | 0.055 | 4.1%    |
| 9    | S7          | 0.02925  | 0.0323 | 0.0355                | 0.0378 | 0.0383 | 0.0731 | 0.039            | 0.043 | 0.028 | 0.041 | 0.038                | 0.051 | 0.0548 | 0.0271 | 0.05            | 0.049 | 0.053        | 0.054 | 0.055 | 4.4%    |
| 13   | S8          | 0.0195   | 0.0194 | 0.0237                | 0.0227 | 0.0192 | 0.0183 | 0.019            | 0.021 | 0.028 | 0.041 | 0.019                | 0.017 | 0.0183 | 0.0271 | 0.017           | 0.016 | 0.027        | 0.027 | 0.033 | 2.3%    |
| 11   | S9          | 0.0234   | 0.0242 | 0.0284                | 0.0284 | 0.0256 | 0.0365 | 0.039            | 0.021 | 0.028 | 0.021 | 0.025                | 0.025 | 0.0274 | 0.0542 | 0.033           | 0.033 | 0.04         | 0.041 | 0.044 | 3.1%    |
| 14   | S10         | 0.0195   | 0.0194 | 0.0237                | 0.0227 | 0.0192 | 0.0183 | 0.019            | 0.011 | 0.028 | 0.021 | 0.019                | 0.017 | 0.0183 | 0.0271 | 0.017           | 0.016 | 0.027        | 0.027 | 0.033 | 2.1%    |
| 6    | S11         | 0.0585   | 0.097  | 0.071                 | 0.1135 | 0.0767 | 0.0731 | 0.077            | 0.085 | 0.085 | 0.083 | 0.076                | 0.051 | 0.0548 | 0.0813 | 0.083           | 0.081 | 0.08         | 0.068 | 0.077 | 7.7%    |
| 8    | S12         | 0.039    | 0.0485 | 0.0473                | 0.0567 | 0.0767 | 0.0365 | 0.039            | 0.064 | 0.056 | 0.062 | 0.076                | 0.051 | 0.0274 | 0.0542 | 0.067           | 0.065 | 0.067        | 0.068 | 0.066 | 5.6%    |
| 7    | S13         | 0.039    | 0.0485 | 0.0473                | 0.0567 | 0.0767 | 0.0365 | 0.039            | 0.064 | 0.056 | 0.062 | 0.076                | 0.101 | 0.0548 | 0.0542 | 0.067           | 0.065 | 0.067        | 0.068 | 0.066 | 6.0%    |
| 12   | S14         | 0.0234   | 0.0242 | 0.0284                | 0.0284 | 0.0256 | 0.0365 | 0.039            | 0.021 | 0.014 | 0.021 | 0.025                | 0.025 | 0.0274 | 0.0271 | 0.033           | 0.033 | 0.04         | 0.041 | 0.044 | 2.9%    |
| 15   | S15         | 0.01671  | 0.0162 | 0.0203                | 0.0189 | 0.0153 | 0.0122 | 0.013            | 0.021 | 0.014 | 0.021 | 0.015                | 0.013 | 0.0137 | 0.0135 | 0.017           | 0.033 | 0.013        | 0.014 | 0.022 | 1.7%    |
| 16   | S17         | 0.01671  | 0.0162 | 0.0203                | 0.0189 | 0.0153 | 0.0122 | 0.013            | 0.021 | 0.014 | 0.021 | 0.015                | 0.013 | 0.0137 | 0.0135 | 0.008           | 0.016 | 0.013        | 0.014 | 0.022 | 1.6%    |
| 18   | S18         | 0.01463  | 0.0139 | 0.0177                | 0.0162 | 0.0128 | 0.0091 | 0.01             | 0.011 | 0.009 | 0.01  | 0.013                | 0.01  | 0.011  | 0.009  | 0.017           | 0.016 | 0.013        | 0.014 | 0.011 | 1.3%    |
| 17   | S19         | 0.01463  | 0.0139 | 0.0177                | 0.0162 | 0.0128 | 0.0091 | 0.01             | 0.011 | 0.009 | 0.01  | 0.015                | 0.01  | 0.011  | 0.009  | 0.017           | 0.016 | 0.013        | 0.014 | 0.011 | 1.3%    |
| 19   | S20         | 0.013    | 0.0121 | 0.0158                | 0.0142 | 0.011  | 0.0073 | 0.008            | 0.007 | 0.007 | 0.007 | 0.011                | 0.008 | 0.0091 | 0.0068 | 0.008           | 0.008 | 0.013        | 0.014 | 0.011 | 1.0%    |
|      |             | 1        | 1      | 1                     | 1      | 1      | 1      | 1                | 1     | 1     | 1     | 1                    | 1     | 1      | 1      | 1               | 1     | 1            | 1     | 1     | 1       |

S21.17 The homestay association

| RANK | STAKEHOLDER | National |        | Central Java Province |        |        |        | Wonosobo Regency |       |       |       | Banjarnegara Regency |       |        |        | Local Community |       | User/Tourist |       |       | Everage |
|------|-------------|----------|--------|-----------------------|--------|--------|--------|------------------|-------|-------|-------|----------------------|-------|--------|--------|-----------------|-------|--------------|-------|-------|---------|
|      |             | S1       | S2     | S3                    | S4     | S5     | S6     | S7               | S8    | S9    | S10   | S11                  | S12   | S13    | S14    | S15             | S16   | S18          | S19   | S20   |         |
| 1    | S1          | 0.1502   | 0.126  | 0.106                 | 0.1872 | 0.1948 | 0.1554 | 0.127            | 0.146 | 0.141 | 0.131 | 0.163                | 0.181 | 0.1697 | 0.1185 | 0.164           | 0.178 | 0.116        | 0.109 | 0.107 | 14.6%   |
| 2    | S2          | 0.1502   | 0.126  | 0.212                 | 0.0936 | 0.1299 | 0.1244 | 0.109            | 0.121 | 0.117 | 0.112 | 0.13                 | 0.136 | 0.1273 | 0.1037 | 0.082           | 0.118 | 0.101        | 0.097 | 0.095 | 12.0%   |
| 3    | S3          | 0.1502   | 0.063  | 0.106                 | 0.0936 | 0.1299 | 0.1244 | 0.109            | 0.121 | 0.117 | 0.112 | 0.13                 | 0.136 | 0.1273 | 0.1037 | 0.082           | 0.118 | 0.101        | 0.097 | 0.095 | 11.1%   |
| 4    | S4          | 0.0751   | 0.126  | 0.106                 | 0.0936 | 0.0649 | 0.0933 | 0.091            | 0.097 | 0.094 | 0.093 | 0.098                | 0.091 | 0.0849 | 0.0889 | 0.164           | 0.059 | 0.087        | 0.085 | 0.083 | 9.3%    |
| 6    | S5          | 0.05007  | 0.063  | 0.053                 | 0.0936 | 0.0649 | 0.0622 | 0.073            | 0.073 | 0.07  | 0.075 | 0.065                | 0.045 | 0.0424 | 0.0741 | 0.082           | 0.118 | 0.072        | 0.073 | 0.071 | 7.0%    |
| 11   | S6          | 0.03004  | 0.0315 | 0.0265                | 0.0312 | 0.0325 | 0.0311 | 0.036            | 0.024 | 0.023 | 0.037 | 0.016                | 0.045 | 0.0424 | 0.0444 | 0.027           | 0.03  | 0.043        | 0.048 | 0.048 | 3.4%    |
| 15   | S7          | 0.02146  | 0.021  | 0.0177                | 0.0187 | 0.0162 | 0.0155 | 0.018            | 0.024 | 0.023 | 0.009 | 0.016                | 0.015 | 0.0141 | 0.0148 | 0.016           | 0.015 | 0.014        | 0.024 | 0.024 | 1.8%    |
| 12   | S8          | 0.02503  | 0.0252 | 0.0212                | 0.0234 | 0.0216 | 0.0311 | 0.018            | 0.024 | 0.047 | 0.019 | 0.033                | 0.023 | 0.0212 | 0.0296 | 0.021           | 0.02  | 0.029        | 0.036 | 0.036 | 2.6%    |
| 13   | S9          | 0.02503  | 0.0252 | 0.0212                | 0.0234 | 0.0216 | 0.0311 | 0.018            | 0.012 | 0.023 | 0.019 | 0.033                | 0.023 | 0.0212 | 0.0296 | 0.021           | 0.02  | 0.029        | 0.036 | 0.036 | 2.5%    |
| 14   | S10         | 0.02146  | 0.021  | 0.0177                | 0.0187 | 0.0162 | 0.0155 | 0.036            | 0.024 | 0.023 | 0.019 | 0.016                | 0.015 | 0.0141 | 0.0148 | 0.016           | 0.015 | 0.014        | 0.024 | 0.024 | 1.9%    |
| 10   | S11         | 0.03004  | 0.0315 | 0.0265                | 0.0312 | 0.0325 | 0.0622 | 0.036            | 0.024 | 0.023 | 0.037 | 0.033                | 0.045 | 0.0424 | 0.0444 | 0.027           | 0.03  | 0.043        | 0.048 | 0.048 | 3.7%    |
| 8    | S12         | 0.03755  | 0.042  | 0.0353                | 0.0468 | 0.0649 | 0.0311 | 0.055            | 0.049 | 0.047 | 0.056 | 0.033                | 0.045 | 0.0849 | 0.0593 | 0.041           | 0.059 | 0.058        | 0.061 | 0.06  | 5.1%    |
| 9    | S13         | 0.03755  | 0.042  | 0.0353                | 0.0468 | 0.0649 | 0.0311 | 0.055            | 0.049 | 0.047 | 0.056 | 0.033                | 0.023 | 0.0424 | 0.0593 | 0.041           | 0.059 | 0.058        | 0.061 | 0.06  | 4.7%    |
| 16   | S14         | 0.01877  | 0.018  | 0.0151                | 0.0156 | 0.013  | 0.0104 | 0.018            | 0.012 | 0.012 | 0.019 | 0.011                | 0.011 | 0.0106 | 0.0148 | 0.014           | 0.012 | 0.029        | 0.012 | 0.012 | 1.5%    |
| 5    | S15         | 0.0751   | 0.126  | 0.106                 | 0.0468 | 0.0649 | 0.0933 | 0.091            | 0.097 | 0.094 | 0.093 | 0.098                | 0.091 | 0.0849 | 0.0889 | 0.082           | 0.059 | 0.087        | 0.085 | 0.083 | 8.7%    |
| 7    | S16         | 0.05007  | 0.063  | 0.053                 | 0.0936 | 0.0325 | 0.0622 | 0.073            | 0.073 | 0.07  | 0.075 | 0.065                | 0.045 | 0.0424 | 0.0741 | 0.082           | 0.059 | 0.072        | 0.073 | 0.071 | 6.5%    |
| 17   | S18         | 0.01877  | 0.018  | 0.0151                | 0.0156 | 0.013  | 0.0104 | 0.018            | 0.012 | 0.012 | 0.019 | 0.011                | 0.011 | 0.0106 | 0.0074 | 0.014           | 0.012 | 0.014        | 0.012 | 0.012 | 1.3%    |
| 18   | S19         | 0.01669  | 0.0158 | 0.0132                | 0.0134 | 0.0108 | 0.0078 | 0.009            | 0.008 | 0.008 | 0.009 | 0.008                | 0.009 | 0.0085 | 0.0148 | 0.012           | 0.01  | 0.014        | 0.012 | 0.024 | 1.2%    |
| 19   | S20         | 0.01669  | 0.0158 | 0.0132                | 0.0134 | 0.0108 | 0.0078 | 0.009            | 0.008 | 0.008 | 0.009 | 0.008                | 0.009 | 0.0085 | 0.0148 | 0.012           | 0.01  | 0.014        | 0.006 | 0.012 | 1.1%    |
|      |             | 1        | 1      | 1                     | 1      | 1      | 1      | 1                | 1     | 1     | 1     | 1                    | 1     | 1      | 1      | 1               | 1     | 1            | 1     | 1     | 1       |

S21.18 ASITA

| RANK | STAKEHOLDER | National |        | Central Java Province |        |       |        | Wonosobo Regency |       |       |       | Banjarnegara Regency |       |        |        | Local Community |       |       | User/Tourist |       | Everage |
|------|-------------|----------|--------|-----------------------|--------|-------|--------|------------------|-------|-------|-------|----------------------|-------|--------|--------|-----------------|-------|-------|--------------|-------|---------|
|      |             | S1       | S2     | S3                    | S4     | S5    | S6     | S7               | S8    | S9    | S10   | S11                  | S12   | S13    | S14    | S15             | S16   | S17   | S19          | S20   |         |
| 17   | S1          | 0.01439  | 0.0282 | 0.0153                | 0.0104 | 0.012 | 0.018  | 0.011            | 0.013 | 0.017 | 0.019 | 0.012                | 0.011 | 0.0135 | 0.0166 | 0.018           | 0.01  | 0.011 | 0.011        | 0.01  | 1.4%    |
| 18   | S2          | 0.00719  | 0.0141 | 0.0153                | 0.0104 | 0.012 | 0.018  | 0.011            | 0.013 | 0.017 | 0.019 | 0.012                | 0.011 | 0.0135 | 0.0166 | 0.018           | 0.01  | 0.011 | 0.011        | 0.01  | 1.3%    |
| 4    | S3          | 0.08633  | 0.0845 | 0.0919                | 0.094  | 0.096 | 0.0901 | 0.087            | 0.064 | 0.117 | 0.074 | 0.081                | 0.095 | 0.1616 | 0.1164 | 0.092           | 0.091 | 0.09  | 0.055        | 0.082 | 9.2%    |
| 11   | S4          | 0.04317  | 0.0423 | 0.0306                | 0.0313 | 0.024 | 0.036  | 0.044            | 0.032 | 0.029 | 0.03  | 0.047                | 0.032 | 0.0269 | 0.0291 | 0.037           | 0.03  | 0.023 | 0.027        | 0.041 | 3.3%    |
| 13   | S5          | 0.02878  | 0.0282 | 0.023                 | 0.0313 | 0.024 | 0.018  | 0.022            | 0.021 | 0.023 | 0.025 | 0.035                | 0.032 | 0.0202 | 0.0233 | 0.018           | 0.03  | 0.068 | 0.018        | 0.021 | 2.7%    |
| 16   | S6          | 0.01439  | 0.0141 | 0.0184                | 0.0157 | 0.024 | 0.018  | 0.015            | 0.016 | 0.019 | 0.021 | 0.023                | 0.016 | 0.0162 | 0.0194 | 0.018           | 0.015 | 0.023 | 0.014        | 0.014 | 1.8%    |
| 8    | S7          | 0.05755  | 0.0563 | 0.046                 | 0.0313 | 0.048 | 0.0541 | 0.044            | 0.064 | 0.039 | 0.037 | 0.058                | 0.032 | 0.0404 | 0.0388 | 0.055           | 0.03  | 0.045 | 0.055        | 0.082 | 4.8%    |
| 6    | S8          | 0.07194  | 0.0704 | 0.0919                | 0.0627 | 0.072 | 0.0721 | 0.044            | 0.064 | 0.058 | 0.049 | 0.07                 | 0.064 | 0.0808 | 0.0582 | 0.073           | 0.061 | 0.068 | 0.165        | 0.041 | 7.0%    |
| 2    | S9          | 0.10072  | 0.0986 | 0.0919                | 0.1253 | 0.12  | 0.1081 | 0.131            | 0.128 | 0.117 | 0.148 | 0.093                | 0.127 | 0.0808 | 0.1164 | 0.11            | 0.122 | 0.113 | 0.11         | 0.123 | 11.4%   |
| 1    | S10         | 0.11511  | 0.1127 | 0.1839                | 0.1567 | 0.144 | 0.1261 | 0.175            | 0.193 | 0.117 | 0.148 | 0.105                | 0.159 | 0.1616 | 0.1164 | 0.128           | 0.152 | 0.135 | 0.165        | 0.164 | 14.5%   |
| 19   | S11         | 0.01439  | 0.0141 | 0.0131                | 0.0078 | 0.008 | 0.009  | 0.009            | 0.011 | 0.015 | 0.016 | 0.012                | 0.008 | 0.0115 | 0.0145 | 0.009           | 0.008 | 0.008 | 0.009        | 0.008 | 1.1%    |
| 10   | S12         | 0.04317  | 0.0423 | 0.0306                | 0.0313 | 0.024 | 0.036  | 0.044            | 0.032 | 0.029 | 0.03  | 0.047                | 0.032 | 0.0269 | 0.0291 | 0.037           | 0.061 | 0.023 | 0.027        | 0.041 | 3.5%    |
| 5    | S13         | 0.08633  | 0.0845 | 0.046                 | 0.094  | 0.096 | 0.0901 | 0.087            | 0.064 | 0.117 | 0.074 | 0.081                | 0.095 | 0.0808 | 0.1164 | 0.092           | 0.091 | 0.09  | 0.055        | 0.082 | 8.5%    |
| 3    | S14         | 0.10072  | 0.0986 | 0.0919                | 0.1253 | 0.12  | 0.1081 | 0.131            | 0.128 | 0.117 | 0.148 | 0.093                | 0.127 | 0.0808 | 0.1164 | 0.092           | 0.122 | 0.113 | 0.11         | 0.123 | 11.3%   |
| 15   | S15         | 0.01439  | 0.0141 | 0.0184                | 0.0157 | 0.024 | 0.018  | 0.015            | 0.016 | 0.019 | 0.021 | 0.023                | 0.016 | 0.0162 | 0.0233 | 0.018           | 0.015 | 0.023 | 0.014        | 0.014 | 1.8%    |
| 12   | S16         | 0.04317  | 0.0423 | 0.0306                | 0.0313 | 0.024 | 0.036  | 0.044            | 0.032 | 0.029 | 0.03  | 0.047                | 0.016 | 0.0269 | 0.0291 | 0.037           | 0.03  | 0.023 | 0.027        | 0.041 | 3.3%    |
| 14   | S17         | 0.02878  | 0.0282 | 0.023                 | 0.0313 | 0.008 | 0.018  | 0.022            | 0.021 | 0.023 | 0.025 | 0.035                | 0.032 | 0.0202 | 0.0233 | 0.018           | 0.03  | 0.023 | 0.018        | 0.021 | 2.4%    |
| 7    | S19         | 0.07194  | 0.0704 | 0.0919                | 0.0627 | 0.072 | 0.0721 | 0.044            | 0.021 | 0.058 | 0.049 | 0.07                 | 0.064 | 0.0808 | 0.0582 | 0.073           | 0.061 | 0.068 | 0.055        | 0.041 | 6.2%    |
| 9    | S20         | 0.05755  | 0.0563 | 0.046                 | 0.0313 | 0.048 | 0.0541 | 0.022            | 0.064 | 0.039 | 0.037 | 0.058                | 0.032 | 0.0404 | 0.0388 | 0.055           | 0.03  | 0.045 | 0.055        | 0.041 | 4.5%    |
|      |             | 1        | 1      | 1                     | 1      | 1     | 1      | 1                | 1     | 1     | 1     | 1                    | 1     | 1      | 1      | 1               | 1     | 1     | 1            | 1     | 1       |

S21.19 IPI

| RANK | STAKEHOLDER | National |        | Central Java Province |        |        |        | Wonosobo Regency |       |       |       | Banjarnegara Regency |       |        |        | Local Community |       |       | User/Tourist |       | Everage |
|------|-------------|----------|--------|-----------------------|--------|--------|--------|------------------|-------|-------|-------|----------------------|-------|--------|--------|-----------------|-------|-------|--------------|-------|---------|
|      |             | S1       | S2     | S3                    | S4     | S5     | S6     | S7               | S8    | S9    | S10   | S11                  | S12   | S13    | S14    | S15             | S16   | S17   | S18          | S20   |         |
| 19   | S1          | 0.01099  | 0.0081 | 0.0132                | 0.0069 | 0.0083 | 0.0071 | 0.01             | 0.011 | 0.013 | 0.016 | 0.013                | 0.009 | 0.0121 | 0.0142 | 0.007           | 0.008 | 0.007 | 0.008        | 0.007 | 1.0%    |
| 16   | S2          | 0.02198  | 0.0163 | 0.0132                | 0.0207 | 0.0083 | 0.0141 | 0.014            | 0.016 | 0.017 | 0.02  | 0.013                | 0.014 | 0.0162 | 0.0189 | 0.014           | 0.013 | 0.012 | 0.013        | 0.021 | 1.6%    |
| 18   | S3          | 0.01099  | 0.0163 | 0.0132                | 0.0103 | 0.0167 | 0.0094 | 0.012            | 0.013 | 0.015 | 0.018 | 0.007                | 0.011 | 0.0139 | 0.0162 | 0.009           | 0.01  | 0.009 | 0.01         | 0.011 | 1.2%    |
| 14   | S4          | 0.03297  | 0.0163 | 0.0263                | 0.0207 | 0.0167 | 0.0282 | 0.018            | 0.02  | 0.02  | 0.024 | 0.027                | 0.018 | 0.0194 | 0.0227 | 0.027           | 0.017 | 0.018 | 0.019        | 0.011 | 2.1%    |
| 15   | S5          | 0.02198  | 0.0325 | 0.0132                | 0.0207 | 0.0167 | 0.0141 | 0.014            | 0.016 | 0.017 | 0.02  | 0.013                | 0.014 | 0.0162 | 0.0189 | 0.014           | 0.013 | 0.012 | 0.013        | 0.021 | 1.7%    |
| 11   | S6          | 0.04396  | 0.0325 | 0.0395                | 0.0207 | 0.0333 | 0.0282 | 0.024            | 0.027 | 0.023 | 0.028 | 0.04                 | 0.027 | 0.0242 | 0.0284 | 0.054           | 0.025 | 0.037 | 0.039        | 0.021 | 3.1%    |
| 6    | S7          | 0.07692  | 0.0813 | 0.0789                | 0.0828 | 0.0833 | 0.0847 | 0.071            | 0.04  | 0.059 | 0.071 | 0.081                | 0.055 | 0.097  | 0.1135 | 0.081           | 0.051 | 0.073 | 0.077        | 0.085 | 7.6%    |
| 5    | S8          | 0.07692  | 0.0813 | 0.0789                | 0.0828 | 0.0833 | 0.0847 | 0.142            | 0.08  | 0.059 | 0.071 | 0.081                | 0.055 | 0.097  | 0.1135 | 0.081           | 0.051 | 0.073 | 0.077        | 0.085 | 8.2%    |
| 2    | S9          | 0.0989   | 0.1138 | 0.1053                | 0.1241 | 0.1167 | 0.1412 | 0.142            | 0.159 | 0.117 | 0.071 | 0.107                | 0.165 | 0.097  | 0.1135 | 0.135           | 0.152 | 0.146 | 0.155        | 0.128 | 12.6%   |
| 1    | S10         | 0.0989   | 0.1138 | 0.1053                | 0.1241 | 0.1167 | 0.1412 | 0.142            | 0.159 | 0.234 | 0.142 | 0.107                | 0.165 | 0.097  | 0.1135 | 0.135           | 0.152 | 0.146 | 0.155        | 0.128 | 13.6%   |
| 17   | S11         | 0.01099  | 0.0163 | 0.0263                | 0.0103 | 0.0167 | 0.0094 | 0.012            | 0.013 | 0.015 | 0.018 | 0.013                | 0.011 | 0.0139 | 0.0162 | 0.009           | 0.01  | 0.009 | 0.01         | 0.011 | 1.3%    |
| 7    | S12         | 0.06593  | 0.065  | 0.0658                | 0.0621 | 0.0667 | 0.0565 | 0.071            | 0.08  | 0.039 | 0.047 | 0.067                | 0.055 | 0.0485 | 0.0567 | 0.054           | 0.101 | 0.037 | 0.039        | 0.064 | 6.0%    |
| 4    | S13         | 0.08791  | 0.0976 | 0.0921                | 0.1034 | 0.1    | 0.1129 | 0.071            | 0.08  | 0.117 | 0.142 | 0.094                | 0.11  | 0.097  | 0.0567 | 0.108           | 0.101 | 0.11  | 0.116        | 0.107 | 10.0%   |
| 3    | S14         | 0.08791  | 0.0976 | 0.0921                | 0.1034 | 0.1    | 0.1129 | 0.071            | 0.08  | 0.117 | 0.142 | 0.094                | 0.11  | 0.194  | 0.1135 | 0.108           | 0.101 | 0.11  | 0.116        | 0.107 | 10.8%   |
| 12   | S15         | 0.04396  | 0.0325 | 0.0395                | 0.0207 | 0.0333 | 0.0141 | 0.024            | 0.027 | 0.023 | 0.028 | 0.04                 | 0.027 | 0.0242 | 0.0284 | 0.027           | 0.025 | 0.037 | 0.039        | 0.021 | 2.9%    |
| 8    | S16         | 0.06593  | 0.065  | 0.0658                | 0.0621 | 0.0667 | 0.0565 | 0.071            | 0.08  | 0.039 | 0.047 | 0.067                | 0.027 | 0.0485 | 0.0567 | 0.054           | 0.051 | 0.037 | 0.039        | 0.064 | 5.6%    |
| 10   | S17         | 0.05495  | 0.0488 | 0.0526                | 0.0414 | 0.05   | 0.0282 | 0.036            | 0.04  | 0.029 | 0.035 | 0.054                | 0.055 | 0.0323 | 0.0378 | 0.027           | 0.051 | 0.037 | 0.019        | 0.043 | 4.1%    |
| 9    | S18         | 0.05495  | 0.0488 | 0.0526                | 0.0414 | 0.05   | 0.0282 | 0.036            | 0.04  | 0.029 | 0.035 | 0.054                | 0.055 | 0.0323 | 0.0378 | 0.027           | 0.051 | 0.073 | 0.039        | 0.043 | 4.4%    |
| 13   | S20         | 0.03297  | 0.0163 | 0.0263                | 0.0414 | 0.0167 | 0.0282 | 0.018            | 0.02  | 0.02  | 0.024 | 0.027                | 0.018 | 0.0194 | 0.0227 | 0.027           | 0.017 | 0.018 | 0.019        | 0.021 | 2.3%    |
|      |             | 1        | 1      | 1                     | 1      | 1      | 1      | 1                | 1     | 1     | 1     | 1                    | 1     | 1      | 1      | 1               | 1     | 1     | 1            | 1     | 1       |

S21.20 ASPPI

| RANK | STAKEHOLDER | National |        | Central Java Province |        |        |        | Wonosobo Regency |       |       |       | Banjarnegara Regency |       |        |        | Local Community |       |       | User/Tourist |       | Everage |
|------|-------------|----------|--------|-----------------------|--------|--------|--------|------------------|-------|-------|-------|----------------------|-------|--------|--------|-----------------|-------|-------|--------------|-------|---------|
|      |             | S1       | S2     | S3                    | S4     | S5     | S6     | S7               | S8    | S9    | S10   | S11                  | S12   | S13    | S14    | S15             | S16   | S17   | S18          | S19   |         |
| 15   | S1          | 0.01617  | 0.0203 | 0.0197                | 0.0134 | 0.0465 | 0.013  | 0.012            | 0.013 | 0.016 | 0.019 | 0.018                | 0.015 | 0.012  | 0.013  | 0.021           | 0.012 | 0.016 | 0.019        | 0.016 | 1.7%    |
| 13   | S2          | 0.01617  | 0.0203 | 0.0393                | 0.0267 | 0.0155 | 0.026  | 0.018            | 0.017 | 0.018 | 0.022 | 0.021                | 0.018 | 0.016  | 0.0173 | 0.032           | 0.025 | 0.016 | 0.022        | 0.019 | 2.1%    |
| 14   | S3          | 0.01617  | 0.0101 | 0.0197                | 0.0267 | 0.0155 | 0.026  | 0.018            | 0.017 | 0.018 | 0.022 | 0.021                | 0.018 | 0.016  | 0.0173 | 0.032           | 0.025 | 0.016 | 0.022        | 0.019 | 2.0%    |
| 11   | S4          | 0.03235  | 0.0203 | 0.0197                | 0.0267 | 0.031  | 0.039  | 0.036            | 0.025 | 0.022 | 0.026 | 0.026                | 0.025 | 0.0241 | 0.0259 | 0.043           | 0.075 | 0.032 | 0.028        | 0.024 | 3.1%    |
| 17   | S5          | 0.00539  | 0.0203 | 0.0197                | 0.0134 | 0.0155 | 0.013  | 0.012            | 0.013 | 0.016 | 0.019 | 0.018                | 0.015 | 0.012  | 0.013  | 0.021           | 0.012 | 0.016 | 0.019        | 0.016 | 1.5%    |
| 18   | S6          | 0.01617  | 0.0101 | 0.0098                | 0.0089 | 0.0155 | 0.013  | 0.009            | 0.01  | 0.014 | 0.016 | 0.015                | 0.012 | 0.0096 | 0.0104 | 0.011           | 0.008 | 0.016 | 0.016        | 0.014 | 1.2%    |
| 10   | S7          | 0.04852  | 0.0405 | 0.0393                | 0.0267 | 0.0465 | 0.0519 | 0.036            | 0.051 | 0.027 | 0.033 | 0.035                | 0.037 | 0.0481 | 0.0519 | 0.053           | 0.025 | 0.048 | 0.037        | 0.032 | 4.0%    |
| 8    | S8          | 0.06469  | 0.0608 | 0.059                 | 0.0535 | 0.062  | 0.0649 | 0.036            | 0.051 | 0.036 | 0.044 | 0.053                | 0.074 | 0.0481 | 0.0519 | 0.064           | 0.05  | 0.064 | 0.056        | 0.048 | 5.5%    |
| 2    | S9          | 0.11321  | 0.1216 | 0.118                 | 0.1336 | 0.1085 | 0.1039 | 0.146            | 0.152 | 0.109 | 0.065 | 0.105                | 0.147 | 0.1443 | 0.1556 | 0.096           | 0.125 | 0.112 | 0.111        | 0.095 | 11.9%   |
| 1    | S10         | 0.11321  | 0.1216 | 0.118                 | 0.1336 | 0.1085 | 0.1039 | 0.146            | 0.152 | 0.219 | 0.131 | 0.105                | 0.147 | 0.1443 | 0.1556 | 0.096           | 0.125 | 0.112 | 0.111        | 0.095 | 12.8%   |
| 4    | S11         | 0.09704  | 0.1014 | 0.0984                | 0.1069 | 0.093  | 0.0909 | 0.109            | 0.101 | 0.109 | 0.131 | 0.105                | 0.074 | 0.0962 | 0.1037 | 0.085           | 0.1   | 0.096 | 0.111        | 0.095 | 10.0%   |
| 6    | S12         | 0.08086  | 0.0811 | 0.0787                | 0.0802 | 0.0775 | 0.0779 | 0.073            | 0.051 | 0.055 | 0.065 | 0.105                | 0.074 | 0.0481 | 0.0519 | 0.074           | 0.075 | 0.08  | 0.111        | 0.095 | 7.5%    |
| 9    | S13         | 0.06469  | 0.0608 | 0.059                 | 0.0535 | 0.062  | 0.0649 | 0.036            | 0.051 | 0.036 | 0.044 | 0.053                | 0.074 | 0.0481 | 0.0259 | 0.064           | 0.05  | 0.064 | 0.056        | 0.048 | 5.3%    |
| 7    | S14         | 0.06469  | 0.0608 | 0.059                 | 0.0535 | 0.062  | 0.0649 | 0.036            | 0.051 | 0.036 | 0.044 | 0.053                | 0.074 | 0.0962 | 0.0519 | 0.064           | 0.05  | 0.064 | 0.056        | 0.048 | 5.7%    |
| 19   | S15         | 0.00809  | 0.0068 | 0.0066                | 0.0067 | 0.0078 | 0.013  | 0.007            | 0.008 | 0.012 | 0.015 | 0.013                | 0.011 | 0.008  | 0.0086 | 0.011           | 0.006 | 0.008 | 0.014        | 0.012 | 1.0%    |
| 12   | S16         | 0.03235  | 0.0203 | 0.0197                | 0.0089 | 0.031  | 0.039  | 0.036            | 0.025 | 0.022 | 0.026 | 0.026                | 0.025 | 0.0241 | 0.0259 | 0.043           | 0.025 | 0.032 | 0.028        | 0.024 | 2.7%    |
| 16   | S17         | 0.01617  | 0.0203 | 0.0197                | 0.0134 | 0.0155 | 0.013  | 0.012            | 0.013 | 0.016 | 0.019 | 0.018                | 0.015 | 0.012  | 0.013  | 0.021           | 0.012 | 0.016 | 0.019        | 0.016 | 1.6%    |
| 3    | S18         | 0.09704  | 0.1014 | 0.0984                | 0.1069 | 0.093  | 0.0909 | 0.109            | 0.101 | 0.109 | 0.131 | 0.105                | 0.074 | 0.0962 | 0.1037 | 0.085           | 0.1   | 0.096 | 0.111        | 0.19  | 10.5%   |
| 5    | S19         | 0.09704  | 0.1014 | 0.0984                | 0.1069 | 0.093  | 0.0909 | 0.109            | 0.101 | 0.109 | 0.131 | 0.105                | 0.074 | 0.0962 | 0.1037 | 0.085           | 0.1   | 0.096 | 0.056        | 0.095 | 9.7%    |
|      |             | 1        | 1      | 1                     | 1      | 1      | 1      | 1                | 1     | 1     | 1     | 1                    | 1     | 1      | 1      | 1               | 1     | 1     | 1            | 1     | 1       |

## S21.21 Total Stakeholder Weight

| RANK | ACTOR/ASSESSOR | National |       | Central Java Province |       |        |        | Wonosobo Regency |       |       |       | Banjarnegara Regency |       |       |       | Local Community |       |       | User/Tourist |       |       | Sum  | Everage      |
|------|----------------|----------|-------|-----------------------|-------|--------|--------|------------------|-------|-------|-------|----------------------|-------|-------|-------|-----------------|-------|-------|--------------|-------|-------|------|--------------|
|      |                | S1       | S2    | S3                    | S4    | S5     | S6     | S7               | S8    | S9    | S10   | S11                  | S12   | S13   | S14   | S15             | S16   | S17   | S18          | S19   | S20   |      |              |
| 11   | S1             |          | 1.2%  | 2.5%                  | 1.3%  | 2.3%   | 3.00%  | 2.1%             | 8.2%  | 1.4%  | 3.6%  | 10.2%                | 7.6%  | 1.7%  | 6.0%  | 10.0%           | 12.6% | 14.6% | 1.4%         | 1.0%  | 1.7%  | 92%  | <b>4.62%</b> |
| 15   | S2             | 2.3%     |       | 2.3%                  | 1.0%  | 2.9%   | 2.28%  | 3.8%             | 6.2%  | 1.8%  | 2.5%  | 3.3%                 | 4.1%  | 1.6%  | 3.0%  | 8.2%            | 10.0% | 12.0% | 1.3%         | 1.6%  | 2.1%  | 72%  | <b>3.61%</b> |
| 2    | S3             | 5.8%     | 7.9%  |                       | 1.2%  | 12.61% | 1.56%  | 4.1%             | 13.6% | 12.6% | 1.9%  | 11.0%                | 13.6% | 12.6% | 7.5%  | 10.8%           | 13.6% | 11.1% | 9.2%         | 1.2%  | 2.0%  | 154% | <b>7.70%</b> |
| 1    | S4             | 10.0%    | 14.2% | 13.2%                 |       | 12.60% | 13.95% | 3.2%             | 12.6% | 13.6% | 11.7% | 13.7%                | 12.6% | 13.5% | 10.7% | 13.6%           | 10.8% | 9.3%  | 3.3%         | 2.1%  | 3.1%  | 198% | <b>9.90%</b> |
| 3    | S5             | 8.3%     | 1.6%  | 3.3%                  | 7.5%  |        | 10.17% | 5.6%             | 10.9% | 10.1% | 14.2% | 12.7%                | 10.0% | 10.0% | 8.0%  | 12.6%           | 7.8%  | 7.0%  | 2.7%         | 1.7%  | 1.5%  | 146% | <b>7.28%</b> |
| 13   | S6             | 1.0%     | 10.1% | 8.1%                  | 1.5%  | 7.5%   |        | 1.6%             | 1.3%  | 8.3%  | 4.8%  | 3.1%                 | 10.8% | 7.6%  | 3.2%  | 2.9%            | 4.1%  | 3.4%  | 1.8%         | 3.1%  | 1.2%  | 86%  | <b>4.28%</b> |
| 10   | S7             | 3.3%     | 7.1%  | 7.2%                  | 4.4%  | 7.4%   | 3.97%  |                  | 10.1% | 5.8%  | 1.0%  | 4.4%                 | 4.4%  | 4.3%  | 5.5%  | 1.7%            | 4.4%  | 1.8%  | 4.8%         | 7.6%  | 4.0%  | 93%  | <b>4.66%</b> |
| 5    | S8             | 7.7%     | 5.0%  | 13.0%                 | 3.1%  | 11.0%  | 4.11%  | 8.3%             |       | 10.9% | 10.8% | 7.9%                 | 3.1%  | 6.0%  | 9.9%  | 2.3%            | 2.3%  | 2.6%  | 7.0%         | 8.2%  | 5.5%  | 129% | <b>6.44%</b> |
| 6    | S9             | 10.4%    | 2.7%  | 3.3%                  | 10.9% | 4.1%   | 9.77%  | 13.1%            | 7.7%  |       | 6.0%  | 5.9%                 | 2.9%  | 3.3%  | 4.2%  | 3.1%            | 3.1%  | 2.5%  | 11.4%        | 12.6% | 11.9% | 129% | <b>6.43%</b> |
| 8    | S10            | 4.5%     | 6.9%  | 10.6%                 | 1.6%  | 7.2%   | 5.69%  | 13.2%            | 3.8%  | 4.3%  |       | 2.3%                 | 2.3%  | 4.1%  | 1.3%  | 2.1%            | 2.1%  | 1.9%  | 14.5%        | 13.6% | 12.8% | 115% | <b>5.74%</b> |
| 12   | S11            | 1.7%     | 1.1%  | 4.4%                  | 5.9%  | 5.7%   | 7.36%  | 1.6%             | 5.7%  | 6.2%  | 1.1%  |                      | 8.2%  | 10.8% | 1.5%  | 4.1%            | 7.7%  | 3.7%  | 1.1%         | 1.3%  | 10.0% | 89%  | <b>4.47%</b> |
| 4    | S12            | 13.0%    | 9.2%  | 10.5%                 | 3.0%  | 10.6%  | 0.95%  | 1.3%             | 4.4%  | 7.7%  | 8.4%  | 8.5%                 |       | 8.2%  | 13.5% | 4.4%            | 5.6%  | 5.1%  | 3.5%         | 6.0%  | 7.5%  | 131% | <b>6.57%</b> |
| 7    | S13            | 13.5%    | 3.7%  | 4.5%                  | 10.3% | 3.2%   | 7.93%  | 2.1%             | 3.1%  | 3.2%  | 13.2% | 6.4%                 | 6.0%  |       | 1.1%  | 5.6%            | 6.0%  | 4.7%  | 8.5%         | 10.0% | 5.3%  | 118% | <b>5.92%</b> |
| 9    | S14            | 5.8%     | 12.3% | 8.7%                  | 2.2%  | 4.2%   | 12.45% | 1.2%             | 3.3%  | 4.6%  | 6.4%  | 2.4%                 | 5.6%  | 5.6%  |       | 1.6%            | 2.9%  | 1.5%  | 11.3%        | 10.8% | 5.7%  | 108% | <b>5.42%</b> |
| 16   | S15            | 4.2%     | 3.8%  | 1.1%                  | 12.6% | 1.3%   | 5.30%  | 11.0%            | 2.2%  | 1.2%  | 4.4%  | 1.8%                 | 2.1%  | 1.3%  | 3.2%  |                 | 1.7%  | 8.7%  | 1.8%         | 2.9%  | 1.0%  | 72%  | <b>3.58%</b> |
| 14   | S16            | 3.1%     | 2.1%  | 1.1%                  | 12.9% | 1.2%   | 3.89%  | 10.2%            | 1.5%  | 1.0%  | 3.2%  | 1.7%                 | 1.6%  | 1.2%  | 12.5% | 7.6%            |       | 6.5%  | 3.3%         | 5.6%  | 2.7%  | 83%  | <b>4.14%</b> |
| 17   | S17            | 1.1%     | 5.2%  | 1.3%                  | 8.1%  | 1.0%   | 2.91%  | 7.7%             | 1.7%  | 1.1%  | 1.7%  | 1.4%                 | 1.5%  | 1.0%  | 3.9%  | 6.0%            | 1.6%  |       | 2.4%         | 4.1%  | 1.6%  | 55%  | <b>2.76%</b> |
| 18   | S18            | 1.3%     | 2.7%  | 1.8%                  | 5.5%  | 2.1%   | 1.52%  | 3.9%             | 1.3%  | 2.4%  | 1.4%  | 1.3%                 | 1.3%  | 2.9%  | 1.0%  | 1.2%            | 1.3%  | 1.3%  |              | 4.4%  | 10.5% | 49%  | <b>2.46%</b> |
| 19   | S19            | 1.6%     | 1.9%  | 1.7%                  | 3.9%  | 1.7%   | 1.20%  | 2.9%             | 1.2%  | 2.2%  | 2.3%  | 1.1%                 | 1.2%  | 2.3%  | 1.2%  | 1.3%            | 1.3%  | 1.2%  | 6.2%         |       | 9.7%  | 46%  | <b>2.31%</b> |
| 20   | S20            | 1.2%     | 1.4%  | 1.3%                  | 2.9%  | 1.5%   | 2.00%  | 2.9%             | 1.1%  | 1.6%  | 1.3%  | 1.0%                 | 1.1%  | 2.1%  | 3.0%  | 1.0%            | 1.0%  | 1.1%  | 4.5%         | 2.3%  |       | 34%  | <b>1.72%</b> |
|      |                | 1.0      | 1.0   | 1.0                   | 1.0   | 1.0    | 1.0    | 1.0              | 1.0   | 1.0   | 1.0   | 1.0                  | 1.0   | 1.0   | 1.0   | 1.0             | 1.0   | 1.0   | 1.0          | 1.0   | 1.0   | 20.0 | 1.0          |

## S.22 Multiplication of the Mamca(A) policy scenario matrix and stakeholder weight matrix

|                                                                                                                                          | National |        | Central Java Province |        |        |        | Wonosobo Regency |        |        |        | BanjarNEGARA Regency |        |        |        | Local Community |        |        | User   |        |        |           |
|------------------------------------------------------------------------------------------------------------------------------------------|----------|--------|-----------------------|--------|--------|--------|------------------|--------|--------|--------|----------------------|--------|--------|--------|-----------------|--------|--------|--------|--------|--------|-----------|
| Scenario                                                                                                                                 | S1       | S2     | S3                    | S4     | S5     | S6     | S7               | S8     | S9     | S10    | S11                  | S12    | S13    | S14    | S15             | S16    | S17    | S18    | S19    | S20    | Mamca (A) |
| Sce 1 A                                                                                                                                  | 5.79%    | 4.87%  | 6.27%                 | 5.75%  | 5.79%  | 5.74%  | 6.61%            | 5.63%  | 4.45%  | 5.89%  | 5.89%                | 5.72%  | 5.82%  | 5.70%  | 27.35%          | 12.42% | 53.35% | 5.73%  | 6.57%  | 6.17%  | 9.58%     |
| Sce 2 A                                                                                                                                  | 12.50%   | 26.90% | 13.86%                | 14.24% | 12.43% | 13.58% | 13.87%           | 20.45% | 10.41% | 12.76% | 14.81%               | 13.62% | 19.88% | 12.23% | 21.71%          | 30.28% | 27.47% | 13.70% | 14.47% | 12.76% | 16.60%    |
| Sce 3 A                                                                                                                                  | 28.42%   | 14.24% | 35.64%                | 33.01% | 51.62% | 45.25% | 48.85%           | 43.07% | 28.17% | 28.47% | 44.27%               | 32.26% | 43.93% | 30.07% | 31.37%          | 36.44% | 12.01% | 37.47% | 40.31% | 50.83% | 35.78%    |
| Sce 4 A                                                                                                                                  | 53.28%   | 53.99% | 44.23%                | 46.99% | 30.16% | 35.43% | 30.68%           | 30.85% | 56.98% | 52.88% | 35.03%               | 48.39% | 30.36% | 52.00% | 19.57%          | 20.86% | 7.16%  | 43.10% | 38.65% | 30.25% | 38.04%    |
| <div>Stakeholder Weight matrix</div> <div></div>       |          |        |                       |        |        |        |                  |        |        |        |                      |        |        |        |                 |        |        |        |        |        |           |
| STAKEHOLDER                                                                                                                              | S1       | S2     | S3                    | S4     | S5     | S6     | S7               | S8     | S9     | S10    | S11                  | S12    | S13    | S14    | S15             | S16    | S17    | S18    | S19    | S20    | Everage   |
| S1                                                                                                                                       | 0.00%    | 1.22%  | 2.50%                 | 1.30%  | 2.27%  | 3.00%  | 2.10%            | 8.24%  | 1.36%  | 3.62%  | 10.22%               | 7.59%  | 1.69%  | 6.00%  | 10.02%          | 12.61% | 14.58% | 1.42%  | 1.01%  | 1.73%  | 4.62%     |
| S2                                                                                                                                       | 2.27%    | 0.00%  | 2.33%                 | 1.00%  | 2.92%  | 2.28%  | 3.83%            | 6.19%  | 1.77%  | 2.52%  | 3.28%                | 4.06%  | 1.56%  | 3.01%  | 8.17%           | 10.04% | 12.04% | 1.31%  | 1.56%  | 2.14%  | 3.61%     |
| S3                                                                                                                                       | 5.85%    | 7.87%  | 0.00%                 | 1.20%  | 12.61% | 1.56%  | 4.11%            | 13.60% | 12.63% | 1.94%  | 11.04%               | 13.56% | 12.56% | 7.47%  | 10.83%          | 13.60% | 11.15% | 9.21%  | 1.21%  | 1.98%  | 7.70%     |
| S4                                                                                                                                       | 10.04%   | 14.20% | 13.16%                | 0.00%  | 12.60% | 13.95% | 3.24%            | 12.61% | 13.63% | 11.68% | 13.73%               | 12.57% | 13.55% | 10.71% | 13.56%          | 10.85% | 9.34%  | 3.34%  | 2.11%  | 3.06%  | 9.90%     |
| S5                                                                                                                                       | 8.26%    | 1.60%  | 3.29%                 | 7.55%  | 0.00%  | 10.17% | 5.60%            | 10.88% | 10.11% | 14.21% | 12.72%               | 10.02% | 10.00% | 8.05%  | 12.57%          | 7.82%  | 6.96%  | 2.68%  | 1.69%  | 1.51%  | 7.28%     |
| S6                                                                                                                                       | 1.05%    | 10.10% | 8.11%                 | 1.51%  | 7.49%  | 0.00%  | 1.64%            | 1.32%  | 8.31%  | 4.76%  | 3.06%                | 10.83% | 7.58%  | 3.23%  | 2.92%           | 4.07%  | 3.42%  | 1.76%  | 3.14%  | 1.23%  | 4.28%     |
| S7                                                                                                                                       | 3.32%    | 7.08%  | 7.23%                 | 4.42%  | 7.38%  | 3.97%  | 0.00%            | 10.07% | 5.77%  | 1.05%  | 4.40%                | 4.35%  | 4.35%  | 5.45%  | 1.69%           | 4.36%  | 1.79%  | 4.81%  | 7.59%  | 4.04%  | 4.66%     |
| S8                                                                                                                                       | 7.67%    | 5.03%  | 13.03%                | 3.15%  | 10.96% | 4.11%  | 8.32%            | 0.00%  | 10.93% | 10.79% | 7.85%                | 3.14%  | 6.00%  | 9.91%  | 2.28%           | 2.28%  | 2.65%  | 7.03%  | 8.17%  | 5.47%  | 6.44%     |
| S9                                                                                                                                       | 10.42%   | 2.67%  | 3.25%                 | 10.87% | 4.09%  | 9.77%  | 13.09%           | 7.65%  | 0.00%  | 5.95%  | 5.94%                | 2.92%  | 3.27%  | 4.17%  | 3.14%           | 3.15%  | 2.46%  | 11.39% | 12.57% | 11.91% | 6.43%     |
| S10                                                                                                                                      | 4.50%    | 6.86%  | 10.65%                | 1.64%  | 7.16%  | 5.69%  | 13.23%           | 3.83%  | 4.29%  | 0.00%  | 2.26%                | 2.28%  | 4.06%  | 1.26%  | 2.11%           | 2.12%  | 1.93%  | 14.51% | 13.56% | 12.83% | 5.74%     |
| S11                                                                                                                                      | 1.73%    | 1.14%  | 4.41%                 | 5.93%  | 5.71%  | 7.36%  | 1.62%            | 5.68%  | 6.19%  | 1.14%  | 0.00%                | 8.17%  | 10.81% | 1.54%  | 4.06%           | 7.75%  | 3.67%  | 1.08%  | 1.32%  | 10.02% | 4.47%     |
| S12                                                                                                                                      | 13.03%   | 9.20%  | 10.48%                | 3.01%  | 10.63% | 0.95%  | 1.30%            | 4.45%  | 7.72%  | 8.39%  | 8.45%                | 0.00%  | 8.17%  | 13.46% | 4.35%           | 5.61%  | 5.07%  | 3.50%  | 6.01%  | 7.55%  | 6.57%     |
| S13                                                                                                                                      | 13.55%   | 3.67%  | 4.53%                 | 10.26% | 3.18%  | 7.93%  | 2.14%            | 3.13%  | 3.15%  | 13.17% | 6.37%                | 6.01%  | 0.00%  | 1.06%  | 5.60%           | 6.02%  | 4.73%  | 8.55%  | 10.02% | 5.33%  | 5.92%     |
| S14                                                                                                                                      | 5.79%    | 12.31% | 8.74%                 | 2.19%  | 4.17%  | 12.45% | 1.20%            | 3.27%  | 4.60%  | 6.38%  | 2.43%                | 5.60%  | 5.59%  | 0.00%  | 1.56%           | 2.93%  | 1.46%  | 11.29% | 10.83% | 5.72%  | 5.42%     |
| S15                                                                                                                                      | 4.20%    | 3.78%  | 1.10%                 | 12.60% | 1.26%  | 5.30%  | 10.97%           | 2.23%  | 1.25%  | 4.44%  | 1.80%                | 2.11%  | 1.32%  | 3.23%  | 0.00%           | 1.69%  | 8.66%  | 1.78%  | 2.92%  | 0.96%  | 3.58%     |
| S16                                                                                                                                      | 3.10%    | 2.06%  | 1.07%                 | 12.90% | 1.24%  | 3.89%  | 10.15%           | 1.54%  | 1.02%  | 3.21%  | 1.66%                | 1.61%  | 1.21%  | 12.47% | 7.59%           | 0.00%  | 6.47%  | 3.26%  | 5.60%  | 2.70%  | 4.14%     |
| S17                                                                                                                                      | 1.06%    | 5.17%  | 1.32%                 | 8.13%  | 1.00%  | 2.91%  | 7.72%            | 1.67%  | 1.11%  | 1.70%  | 1.37%                | 1.52%  | 1.01%  | 3.89%  | 6.01%           | 1.56%  | 0.00%  | 2.36%  | 4.06%  | 1.57%  | 2.76%     |
| S18                                                                                                                                      | 1.34%    | 2.70%  | 1.76%                 | 5.52%  | 2.10%  | 1.52%  | 3.93%            | 1.35%  | 2.36%  | 1.41%  | 1.26%                | 1.32%  | 2.90%  | 0.98%  | 1.21%           | 1.25%  | 1.35%  | 0.00%  | 4.35%  | 10.52% | 2.46%     |
| S19                                                                                                                                      | 1.60%    | 1.90%  | 1.72%                 | 3.92%  | 1.68%  | 1.20%  | 2.86%            | 1.24%  | 2.19%  | 2.34%  | 1.12%                | 1.21%  | 2.28%  | 1.16%  | 1.32%           | 1.27%  | 1.18%  | 6.23%  | 0.00%  | 9.73%  | 2.31%     |
| S20                                                                                                                                      | 1.24%    | 1.44%  | 1.31%                 | 2.93%  | 1.55%  | 2.00%  | 2.94%            | 1.05%  | 1.64%  | 1.29%  | 1.03%                | 1.13%  | 2.11%  | 2.96%  | 1.01%           | 1.01%  | 1.09%  | 4.48%  | 2.28%  | 0.00%  | 1.72%     |
| <div>Scenario Policy Weight Matrix</div> <div></div> |          |        |                       |        |        |        |                  |        |        |        |                      |        |        |        |                 |        |        |        |        |        |           |
| Scenario                                                                                                                                 | S1       | S2     | S3                    | S4     | S5     | S6     | S7               | S8     | S9     | S10    | S11                  | S12    | S13    | S14    | S15             | S16    | S17    | S18    | S19    | S20    | Mamca (B) |
| Sce 1 B                                                                                                                                  | 7.29%    | 9.25%  | 6.71%                 | 13.15% | 6.65%  | 8.47%  | 12.34%           | 7.17%  | 6.74%  | 7.68%  | 6.91%                | 7.10%  | 6.68%  | 9.15%  | 9.11%           | 6.87%  | 8.02%  | 7.49%  | 8.60%  | 6.86%  | 8.11%     |
| Sce 2 B                                                                                                                                  | 15.85%   | 15.35% | 15.32%                | 18.50% | 15.32% | 15.67% | 17.89%           | 14.97% | 15.19% | 16.26% | 15.22%               | 15.22% | 14.58% | 17.43% | 17.07%          | 15.65% | 17.25% | 15.21% | 16.08% | 14.99% | 15.95%    |
| Sce 3 B                                                                                                                                  | 36.61%   | 35.42% | 36.71%                | 36.08% | 36.45% | 35.96% | 32.98%           | 35.92% | 38.85% | 38.07% | 36.67%               | 37.67% | 38.18% | 36.26% | 34.57%          | 34.91% | 33.70% | 35.45% | 34.97% | 35.46% | 36.04%    |
| Sce 4 B                                                                                                                                  | 40.24%   | 39.98% | 41.25%                | 32.26% | 41.58% | 39.90% | 36.80%           | 41.95% | 39.21% | 37.99% | 41.20%               | 40.01% | 40.55% | 37.15% | 39.26%          | 42.57% | 41.04% | 41.85% | 40.35% | 42.69% | 39.89%    |
